# Supplementary material for: Modelling effects of seasonal variation in water table depth on net ecosystem CO 2 exchange of a tropical peatland
Source: Copernicus journal article supplement (doi:10.5194/bg-11-577-2014), 2014-02-03
Supplement: Supplementary file 1 [file bg-11-577-2014-supplement.pdf]

## SUPPLEMENTARY MATERIAL

1

2

### 3 **Model development**

#### 4 **General**

5 *Ecosys* is an hourly time-step model with multiple canopy and soil layers that  
6 provide a framework for different plant and microbial populations to acquire, transform  
7 and exchange resources (energy, water, C, N and P). The model is constructed from  
8 algorithms representing basic physical, chemical and biological processes that determine  
9 process rates in plant and microbial populations interacting within complex biomes. These  
10 algorithms interact to simulate complex ecosystem behaviour across a wide range of  
11 spatial and biological scales. The model is designed to represent terrestrial ecosystems  
12 under range of natural and anthropogenic disturbances and environmental changes at patch  
13 (spatially homogenous one-dimensional) and landscape (spatially variable two- or three-  
14 dimensional) scales. A comprehensive description of *ecosys* with a detailed listing of  
15 inputs, outputs, governing equations, parameters, results and references can be found in  
16 Grant (2001). A more detailed description of model algorithms and parameters most  
17 relevant to simulating temperature, water and nutrient effects on net ecosystem  
18 productivity (NEP) is given below, with reference to equations and variable definitions in  
19 appendices A-H below.

#### 20 **Appendix A: Soil C, N and P transformations**

##### 21 **Decomposition**

22 Organic transformations in *ecosys* occur in five organic matter-microbe  
23 complexes (coarse woody litter, fine non-woody litter, animal manure, particulate organic

24 matter (POM), and humus) in each soil layer. Each complex consists of five organic  
25 states: solid organic matter ( $S$ ), dissolved organic matter ( $Q$ ), sorbed organic matter ( $A$ ),  
26 microbial biomass ( $M$ ), and microbial residues ( $Z$ ), among which C, N, and P are  
27 transformed. Organic matter in litter and manure complexes are partitioned from  
28 proximate analysis results into carbohydrate, protein, cellulose, and lignin components of  
29 differing vulnerability to hydrolysis. Organic matter in POM, humus, microbial biomass  
30 and microbial residues in all complexes are also partitioned into components of differing  
31 vulnerability to hydrolysis.

32         The rate at which each component of each organic state in each complex is  
33 hydrolyzed during decomposition is a first-order function of the decomposer biomass ( $M$ )  
34 of all heterotrophic microbial populations [A1]. Decomposer biomasses are redistributed  
35 among complexes from active biomasses according to biomass-substrate concentration  
36 differences (priming) [A3]. The rate at which each component is hydrolyzed is also a  
37 Monod function of substrate concentration [A3, A5], calculated from the fraction of  
38 substrate mass colonized by  $M$  [A4]. Hydrolysis rates are controlled by soil temperature  
39 ( $T_s$ ) through an Arrhenius function [A6] and by soil water content ( $\theta$ ) through its effect  
40 on aqueous microbial concentrations ( $[M]$ ) [A3, A5] in surface litter and in a spatially  
41 resolved soil profile.  $T_s$  and  $\theta$  are calculated from surface energy balances and from heat  
42 and water transfer schemes through canopy–snow–residue–soil profiles. Release of N and  
43 P from hydrolysis of each component in each complex is determined by its N and P  
44 concentrations [A7] which are determined from those of the originating litterfall as  
45 described in *Autotrophic respiration and Growth and senescence* below. Most non-lignin  
46 hydrolysis products are released as dissolved organic C, N and P (DOC, DON, and DOP)

47 which are adsorbed or desorbed according to a power function of their soluble  
48 concentrations [A8-A10].

#### 49 **Microbial growth**

50 The DOC decomposition product is the substrate for heterotrophic respiration ( $R_h$ )  
51 by all  $M$  in each substrate-microbe complex [A13]. Total  $R_h$  for all soil layers [A11]  
52 drives CO<sub>2</sub> emission from the soil surface through volatilization and diffusion.  $R_h$  may be  
53 constrained by microbial N or P concentrations,  $T_s$ , DOC and O<sub>2</sub> [A12 - A14]. O<sub>2</sub> uptake  
54 by  $M$  is driven by  $R_h$  [A16] and constrained by O<sub>2</sub> diffusivity to microbial surfaces [A17],  
55 as described for roots in *Autotrophic respiration and Growth and senescence* below.  
56 Thus  $R_h$  is coupled to O<sub>2</sub> reduction by all aerobic  $M$  according to O<sub>2</sub> availability.  $R_h$  not  
57 coupled with O<sub>2</sub> reduction is coupled with the sequential reduction of NO<sub>3</sub><sup>-</sup>, NO<sub>2</sub><sup>-</sup>, and  
58 N<sub>2</sub>O by heterotrophic denitrifiers, and with the reduction of organic C by fermenters and  
59 acetotrophic methanogens. In addition, autotrophic nitrifiers conduct NH<sub>4</sub><sup>+</sup> and NO<sub>2</sub><sup>-</sup>  
60 oxidation, and NO<sub>2</sub><sup>-</sup> reduction, and autotrophic methanogens and methanotrophs conduct  
61 CH<sub>4</sub> production and oxidation.

62 All microbial populations undergo maintenance respiration ( $R_m$ ) [A18, A19],  
63 depending on microbial N and  $T_s$  as described earlier for plants.  $R_h$  in excess of  $R_m$  is  
64 used in growth respiration  $R_g$  [A20], the energy yield  $\Delta G$  of which drives growth in  
65 biomass  $M$  from DOC uptake according to the energy requirements of biosynthesis [A21-  
66 A22].  $R_m$  in excess of  $R_h$  causes microbial dieback.  $M$  also undergoes first-order  
67 decomposition ( $D_m$ ) [A23]. Internal retention and recycling of microbial N and P during  
68 decomposition [A24] is modelled whenever these nutrients constrain  $R_h$  [A12]. Changes

69 in  $M$  arise from differences between gains from DOC uptake and losses from  $R_m + R_g +$   
70  $D_m$  [A25].

### 71 **Microbial nutrient exchange**

72 During these changes, all microbial populations seek to maintain set minimum  
73 ratios of C:N or C:P in  $M$  by mineralizing or immobilizing  $\text{NH}_4^+$ ,  $\text{NO}_3^-$  and  $\text{H}_2\text{PO}_4^-$   
74 [A26], thereby controlling solution  $[\text{NH}_4^+]$ ,  $[\text{NO}_3^-]$  and  $[\text{H}_2\text{PO}_4^-]$  that determine root and  
75 mycorrhizal uptake. If immobilization is inadequate to maintain these minimum ratios,  
76 then biomass C:N or C:P may rise, but  $R_h$  is constrained by N or P present in the lowest  
77 concentration with respect to that at the minimum ratio [A12]. Non-symbiotic  
78 heterotrophic diazotrophs can also fix aqueous  $\text{N}_2$  [A27] to the extent that immobilization  
79 is inadequate to maintain their set minimum C:N, but at an additional respiration cost  
80 [A28]. Changes in microbial N and P arise from DON and DOP uptake plus  $\text{NH}_4^+$ ,  $\text{NO}_3^-$   
81 and  $\text{H}_2\text{PO}_4^-$  immobilization and  $\text{N}_2$  fixation, less  $\text{NH}_4^+$ ,  $\text{NO}_3^-$ , and  $\text{H}_2\text{PO}_4^-$  mineralization  
82 and microbial N and P decomposition [A29].

### 83 **Humification**

84 C, N and P decomposition products in each organic matter-microbe complex are  
85 gradually stabilized into more recalcitrant organic forms with lower C:N and C:P ratios.  
86 Products from lignin hydrolysis [A1, A7] combine with some of the products from  
87 protein and carbohydrate hydrolysis in the litterfall and manure complexes and are  
88 transferred to the POM complex [A31-A34]. Microbial decomposition products [A23-  
89 A24] from all complexes are partitioned between the humus complex and microbial  
90 residues in the originating complex according to soil clay content [A35-A36].

### 91 **Appendix B: Soil-plant water relations**

## 92 **Canopy transpiration**

93 Canopy energy exchange in *ecosys* is calculated from an hourly two-stage  
94 convergence solution for the transfer of water and heat through a multi-layered multi-  
95 population soil-root-canopy system. The first stage of this solution requires convergence  
96 to a value of canopy temperature ( $T_c$ ) for each plant population at which the first-order  
97 closure of the canopy energy balance (net radiation ( $R_n$ ), latent heat flux ( $LE$ ) [B1a,b,c],  
98 sensible heat flux ( $H$ ) [B1d], and change in heat storage ( $G$ )) is achieved. These fluxes  
99 are controlled by aerodynamic ( $r_a$ ) [B3] and canopy stomatal ( $r_c$ ) [B2] resistances. Two  
100 controlling mechanisms are postulated for  $r_c$  which are solved in two successive steps:

101 (1) At the leaf level, leaf resistance ( $r_l$ ) [C4] controls gaseous  $CO_2$  diffusion through each  
102 leaf surface when calculating  $CO_2$  fixation [C1] from concurrent solutions for  
103 diffusion ( $V_g$ ) [C2] and carboxylation ( $V_c$ ) [C3]. The value of  $r_l$  is calculated from a  
104 minimum leaf resistance ( $r_{lmin}$ ) [C5] for each leaf surface that allows a set ratio for  
105 intercellular to canopy  $CO_2$  concentration ( $C_i:C_b$ ) to be maintained at  $V_c$  under  
106 ambient irradiance, air temperature  $T_a$ ,  $C_a$  and zero canopy water potential ( $\psi_c$ ) ( $V_c'$ ).  
107 This ratio will be allowed to vary diurnally as described in *C<sub>3</sub> gross primary*  
108 *productivity* when  $\psi_c$  is solved in the second stage of the convergence solution.  
109 Values of  $r_{lmin}$  are aggregated by leaf surface area to a canopy value ( $r_{cmin}$ ) for use in  
110 the energy balance convergence scheme [B2a].

111 (2) At the canopy level,  $r_c$  rises from  $r_{cmin}$  at zero  $\psi_c$  from step (1) above through an  
112 exponential function of canopy turgor potential ( $\psi_t$ )[B2b] calculated from  $\psi_c$  and  
113 osmotic water potential ( $\psi_\pi$ ) [B4] during convergence for transpiration vs. water  
114 uptake.

## 115 **Root and mycorrhizal water uptake**

116           Root and mycorrhizal water uptake ( $U$ ) [B5] is calculated from the difference  
117 between  $\psi_c$  and soil water potential ( $\psi_s$ ) across soil and root hydraulic resistances ( $\Omega_s$   
118 [B9] and  $\Omega_r$  [B10 – B12]) in each rooted soil layer [B6]. Root resistances are calculated  
119 from root radial [B10] and from primary [B11] secondary [B12] axial resistivities using  
120 root lengths and surface areas from a root system submodel [B13] driven by exchange of  
121 nonstructural C, N and P along concentration gradients generated by uptake vs.  
122 consumption of C, N and P in shoots and roots (Grant, 1998a).

## 123 **Canopy water potential**

124           After convergence for  $T_c$  is achieved, the difference between canopy transpiration  
125 ( $E_c$ ) from the energy balance [B1] and total root water uptake ( $U_c$ ) [B5] from all rooted  
126 layers in the soil is tested against the difference between canopy water content from the  
127 previous hour and that from the current hour [B14]. This difference is minimized in each  
128 iteration by adjusting  $\psi_c$  which in turn determines each of the three terms in [B14].  
129 Because  $r_c$  and  $T_c$  both drive  $E_c$ , the canopy energy balance described in *Canopy*  
130 *transpiration* is recalculated for each adjusted value of  $\psi_c$  during convergence.

## 131 **Appendix C: Gross primary productivity and autotrophic respiration**

### 132 **C<sub>3</sub> gross primary productivity**

133           After successful convergence for  $T_c$  and  $\psi_c$  as described in *Canopy transpiration*,  
134  $V_c$  is recalculated from that under zero  $\psi_c$  ( $V_c'$ ) to that under ambient  $\psi_c$ . This  
135 recalculation is driven by stomatal effects on  $V_g$  [C2] from the increase in  $r_{\min}$  at zero  $\psi_c$   
136 [C5] to  $r_c$  at ambient  $\psi_c$  [C4], and by non-stomatal effects ( $f_\psi$ ) [C9] on CO<sub>2</sub>- and light-  
137 limited carboxylation ( $V_b$ ) [C6] and  $V_j$  [C7] (Grant and Flanagan, 2007). The

138 recalculation of  $V_c$  is accomplished through a convergence solution for  $C_i$  and its aqueous  
139 counterpart  $C_c$  at which  $V_g$  [C2] equals  $V_c$  [C3] (Grant and Flanagan, 2007). The  $\text{CO}_2$   
140 fixation rate of each leaf surface at convergence is added to arrive at a value for gross  
141 primary productivity (GPP) by each plant population in the model [C1]. The  $\text{CO}_2$  fixation  
142 product is stored in nonstructural C pools ( $\sigma_c$ ) in each branch.

143 GPP is strongly controlled by nutrient uptake ( $U_{\text{NH}_4}$ ,  $U_{\text{NO}_3}$  and  $U_{\text{PO}_4}$  [C23]),  
144 products of which are added to nonstructural N ( $\sigma_N$ ) and P ( $\sigma_P$ ) in root and mycorrhizal  
145 layers where they are coupled with  $\sigma_c$  to drive growth of branches, roots and  
146 mycorrhizae as described in *Growth and senescence*. Low  $\sigma_N:\sigma_c$  or  $\sigma_P:\sigma_c$  in branches  
147 indicate excess  $\text{CO}_2$  fixation with respect to N or P uptake for phytomass growth. Such  
148 ratios in the model have two effects on GPP:

149 (1) They reduce activities of rubisco [C6a] and chlorophyll [C7a] through product  
150 inhibition [C11], thereby simulating the suppression of  $\text{CO}_2$  fixation by leaf  $\sigma_c$   
151 accumulation widely reported in the literature.

152 (2) They reduce the structural N:C and P:C ratios at which leaves are formed because  $\sigma_c$ ,  
153  $\sigma_N$  and  $\sigma_P$  are the substrates for leaf growth. Lower structural ratios cause a  
154 proportional reduction in areal concentrations of rubisco [C6b] and chlorophyll [C7b],  
155 reducing leaf  $\text{CO}_2$  fixation.

## 156 **Autotrophic respiration**

157 The temperature dependent oxidation of these nonstructural pools ( $R_c$ ) [C14], plus  
158 the energy costs of nutrient uptake [C23], drive autotrophic respiration ( $R_a$ ) [C13] by all  
159 branches, roots and mycorrhizae.  $R_c$  by roots and mycorrhizae is constrained by  $\text{O}_2$   
160 uptake ( $U_{\text{O}_2}$ ) [C14b] calculated by solving for aqueous  $\text{O}_2$  concentrations at root and

161 mycorrhizal surfaces ( $[O_{2r}]$ ) at which convection + radial diffusion through the soil  
162 aqueous phase plus radial diffusion through the root aqueous phase [C14d] equals active  
163 uptake driven by  $O_2$  demand from  $R_c$  [C14c] (Grant, 2004). These diffusive fluxes are in  
164 turn coupled to volatilization -dissolution between aqueous and gaseous phases in soil  
165 and root [D14]. The diffusion processes are driven by aqueous  $O_2$  concentrations  
166 sustained by transport and dissolution of gaseous  $O_2$  through soil and roots (Grant, 2004),  
167 and are governed by lengths and surface areas of roots and mycorrhizae (Grant, 1998a).  
168 Thus  $R_c$  is coupled to  $O_2$  reduction by all root and mycorrhizal populations according to  
169  $O_2$  availability.  $R_c$  is first used to meet maintenance respiration requirements ( $R_m$ ),  
170 calculated independently of  $R_c$  from the N content in each organ, and a function of  $T_c$  or  
171  $T_s$  [C16]. Any excess of  $R_c$  over  $R_m$  is expended as growth respiration ( $R_g$ ), constrained  
172 by branch, root or mycorrhizal  $\psi_t$  [C17]. When  $R_m$  exceeds  $R_c$ , the shortfall is met by the  
173 respiration of remobilizable C ( $R_s$ ) in leaves and twigs or roots and mycorrhizae [C15].

#### 174 **Growth and senescence**

175  $R_g$  drives the conversion of branch  $\sigma_C$  into foliage, twigs, branches, boles and  
176 reproductive material according to organ growth yields ( $Y_g$ ) and phenology-dependent  
177 partitioning coefficients [C20], and the conversion of root and mycorrhizal  $\sigma_C$  into  
178 primary and secondary axes according to root and mycorrhizal growth yields. Growth  
179 also requires organ-specific ratios of nonstructural N ( $\sigma_N$ ) and P ( $\sigma_P$ ) from  $U_{NH_4}$ ,  $U_{NO_3}$   
180 and  $U_{PO_4}$  [C23] which are coupled with  $\sigma_C$  to drive growth of branches, roots and  
181 mycorrhizae.

182 The translocation of  $\sigma_C$ ,  $\sigma_N$  and  $\sigma_P$  among branches and root and mycorrhizal  
183 layers is driven by concentration gradients generated by production of  $\sigma_C$  from branch



184 GPP and of  $\sigma_N$  and  $\sigma_P$  from root and mycorrhizal uptake vs. consumption of  $\sigma_C$ ,  $\sigma_N$  and  
185  $\sigma_P$  from  $R_c$ ,  $R_g$  and phytomass growth (Grant, 1998a). Low  $\sigma_N:\sigma_C$  or  $\sigma_P:\sigma_C$  in  
186 mycorrhizae and roots indicates inadequate N or P uptake with respect to CO<sub>2</sub> fixation.  
187 These ratios affect translocation of  $\sigma_C$ ,  $\sigma_N$  and  $\sigma_P$  by lowering mycorrhizal-root-branch  
188 concentration gradients of  $\sigma_N$  and  $\sigma_P$  while raising branch-root-mycorrhizal concentration  
189 gradients of  $\sigma_C$ . These changes slow transfer of  $\sigma_N$  and  $\sigma_P$  from root to branch and hasten  
190 transfer of  $\sigma_C$  from branch to root, increasing root and mycorrhizal growth at the expense  
191 of branch growth, and thereby raising N and P uptake [C23] with respect to CO<sub>2</sub> fixation.  
192 Conversely, high  $\sigma_N:\sigma_C$  or  $\sigma_P:\sigma_C$  in roots and mycorrhizae indicate excess N or P uptake  
193 with respect to CO<sub>2</sub> fixation. Such ratios reduce specific activities of root and  
194 mycorrhizal surfaces for N or P uptake through a product inhibition function as has been  
195 observed experimentally. These changes hasten transfer of  $\sigma_N$  and  $\sigma_P$  from root to branch  
196 and slow transfer of  $\sigma_C$  from branch to root, increasing branch growth at the expense of  
197 root and mycorrhizal growth, and thereby slowing N and P uptake Thus the modelled  
198 plant translocates  $\sigma_C$ ,  $\sigma_N$  and  $\sigma_P$  among branches, roots and mycorrhizae to maintain a  
199 functional equilibrium between acquisition and use of C, N and P by different parts of the  
200 plant.

201  $R_g$  is limited by  $\psi_t$  [C17], and because branch  $\psi_t$  declines relatively more with soil  
202 drying than does root  $\psi_t$ , branch  $R_g$  also declines relatively more with soil drying than  
203 does root  $R_g$ , slowing oxidation of  $\sigma_C$  in branches and allowing more translocation of  $\sigma_C$   
204 from branches to roots. This change in allocation of  $\sigma_C$  enables more root growth to  
205 reduce  $\Omega_s$ ,  $\Omega_t$  and  $\Omega_a$ , and hence increase  $U$  [B6], thereby offsetting the effects of soil

206 drying on  $\psi_i$ . Thus the modelled plant translocates  $\sigma_C$ ,  $\sigma_N$  and  $\sigma_P$  among branches, roots  
207 and mycorrhizae to maintain a functional equilibrium between acquisition and use of  
208 water.

209  $R_s$  [C15] drives the withdrawal of remobilizable C, N and P (mostly nonstructural  
210 protein) from leaves and twigs or roots and mycorrhizae into  $\sigma_N$  and  $\sigma_P$ , and the loss of  
211 associated non-remobilizable C, N and P (mostly structural) as litterfall [C18]. Provision  
212 is also made to withdraw remobilizable N or P from leaves and twigs or roots and  
213 mycorrhizae when ratios of  $\sigma_N:\sigma_C$  or  $\sigma_P:\sigma_C$  become smaller than those required for  
214 growth of new phytomass. This withdrawal drives the withdrawal of associated  
215 remobilizable C, and the loss of associated non-remobilizable C, N and P as litterfall.  
216 Environmental constraints such as water, heat, nutrient or  $O_2$  stress that reduce  $\sigma_C$  and  
217 hence  $R_c$  with respect to  $R_m$  therefore hasten litterfall.

218  $R_a$  of each branch or root and mycorrhizal layer is the total of  $R_c$  and  $R_s$ , and net  
219 primary productivity (NPP) is the difference between canopy GPP [C1] and total  $R_a$  of all  
220 branches and root and mycorrhizal layers [C13]. Phytomass net growth is the difference  
221 between gains driven by  $R_g$  and  $Y_g$ , and losses driven by  $R_s$  and litterfall [C20]. These  
222 gains are allocated to leaves, twigs, wood and reproductive material at successive branch  
223 nodes, and to roots and mycorrhizae at successive primary and secondary axes, driving  
224 leaf expansion [C21a] and root extension [C21b]. Losses from remobilization and  
225 litterfall in shoots start at the lowest node of each branch at which leaves or twigs are  
226 present, and proceed upwards when leaves or twigs are lost. Losses in roots and  
227 mycorrhizae start with secondary axes and proceeds to primary axes when secondary  
228 axes are lost.

229 **Root and mycorrhizal nutrient uptake**

230 Root and mycorrhizal uptake of N and P ( $U_{\text{NH}_4}$ ,  $U_{\text{NO}_3}$  and  $U_{\text{PO}_4}$ ) is calculated by  
231 solving for solution  $[\text{NH}_4^+]$ ,  $[\text{NO}_3^-]$  and  $[\text{H}_2\text{PO}_4^-]$  at root and mycorrhizal surfaces at  
232 which radial transport by mass flow and diffusion from the soil solution to these surfaces  
233 [C23a,c,e] equals active uptake by the surfaces [C23b,d,f]. Path lengths and surface areas  
234 for  $U_{\text{NH}_4}$ ,  $U_{\text{NO}_3}$  and  $U_{\text{PO}_4}$  are calculated from a root and mycorrhizal growth submodel  
235 driven by exchange of nonstructural C, N and P along concentration gradients generated  
236 by uptake vs. consumption of C, N and P in shoots and roots (Grant, 1998a). A product  
237 inhibition function is included to avoid uptake in excess of nutrient requirements [C23g].

238 **C<sub>4</sub> gross primary productivity**

239 **C<sub>4</sub> mesophyll**

240 In C<sub>4</sub> plants, the mesophyll carboxylation rate is the lesser of CO<sub>2</sub>- and light-  
241 limited reaction rates [C26] (Berry and Farquhar, 1978). The CO<sub>2</sub>-limited rate is a  
242 Michaelis-Menten function of PEP carboxylase (PEPc) activity and aqueous CO<sub>2</sub>  
243 concentration in the mesophyll [C29] parameterized from Berry and Farquhar (1978) and  
244 from Edwards and Walker (1983). The light-limited rate [C30] is a hyperbolic function of  
245 absorbed irradiance and mesophyll chlorophyll activity [C31] with a quantum  
246 requirement based on 2 ATP from Berry and Farquhar (1978). PEPc [C32] and  
247 chlorophyll [C33] activities are calculated from specific activities multiplied by set  
248 fractions of leaf surface N density, and from functions of C<sub>4</sub> product inhibition (Jiao and  
249 Chollet, 1988; Lawlor, 1993) [C34],  $\psi_c$  ([C35] as described in Grant and Flanagan  
250 (2007)) and  $T_c$  [C36]. Leaf surface N density is controlled by leaf structural N:C and P:C

251 ratios calculated during leaf growth from leaf non-structural N:C and P:C ratios arising  
252 from root N and P uptake (Grant, 1998a) vs. CO<sub>2</sub> fixation.

### 253 **C<sub>4</sub> mesophyll-bundle sheath exchange**

254 Differences in the mesophyll and bundle sheath concentrations of the C<sub>4</sub>  
255 carboxylation product drive mesophyll-bundle sheath transfer (Leegood, 2000) [C37].  
256 The bundle sheath concentration of the C<sub>4</sub> product drives a product-inhibited  
257 decarboxylation reaction (Laisk and Edwards, 2000) [C38], the CO<sub>2</sub> product of which  
258 generates a concentration gradient that drives leakage of CO<sub>2</sub> from the bundle sheath to  
259 the mesophyll [C39]. CO<sub>2</sub> in the bundle sheath is maintained in 1:50 equilibrium with  
260 HCO<sub>3</sub><sup>-</sup> (Laisk and Edwards, 2000). At this stage of model development, the return of a C<sub>3</sub>  
261 decarboxylation product from the bundle sheath to the mesophyll is not simulated.  
262 Parameters used in Eqs. [C37-C39] allowed mesophyll and bundle sheath concentrations  
263 of C<sub>4</sub> carboxylation products from [C40-C41] to be maintained at values consistent with  
264 those in Leegood (2000), bundle sheath concentrations of CO<sub>2</sub> (from [C42]) to be  
265 maintained at values similar to those reported by Furbank and Hatch (1987), and bundle  
266 sheath CO<sub>2</sub> leakiness [C39]), expressed as a fraction of PEP carboxylation, to be  
267 maintained at values similar to those in Williams et al. (2001), in sorghum as described in  
268 Grant et al. (2004).

### 269 **C<sub>4</sub> bundle sheath**

270 A C<sub>3</sub> model in which carboxylation is the lesser of CO<sub>2</sub>- and light-limited reaction  
271 rates (Farquhar et al., 1980) has been parameterized for the bundle sheath of C<sub>4</sub> plants  
272 [C43] from Seeman et al. (1984). The CO<sub>2</sub>-limited rate [C44] is a Michaelis-Menten  
273 function of RuBP carboxylase (RuBPC) activity and bundle sheath CO<sub>2</sub> concentration

274 [C42]. The light-limited rate [C45] is a hyperbolic function of absorbed irradiance and  
275 activity of chlorophyll associated with the bundle sheath with a quantum yield based on 3  
276 ATP [C46]. The provision of reductant from the mesophyll to the bundle sheath in  
277 NADP-ME species is not explicitly simulated. RuBPc [C47] and chlorophyll [C48]  
278 activities are the products of specific activities and concentrations multiplied by set  
279 fractions of leaf surface N density, and from functions of C<sub>3</sub> product inhibition (Bowes,  
280 1991; Stitt, 1991) [C49],  $\psi_c$  ([A12] from Grant and Flanagan (2007)) and  $T_c$  [C36].

281 Rates of C<sub>3</sub> product removal are controlled by phytomass biosynthesis rates  
282 driven by concentrations of nonstructural products from leaf CO<sub>2</sub> fixation and from root  
283 N and P uptake. If biosynthesis rates are limited by nutrient uptake, consequent depletion  
284 of nonstructural N or P and accumulation of nonstructural C will constrain specific  
285 activities of RuBP and chlorophyll [C47-C49], and thereby slow C<sub>3</sub> carboxylation [C43],  
286 raise bundle sheath CO<sub>2</sub> concentration [C42], accelerate CO<sub>2</sub> leakage [C39], slow C<sub>4</sub>  
287 decarboxylation [C38], raise C<sub>4</sub> product concentration in the bundle sheath [C41], slow  
288 C<sub>4</sub> product transfer from the mesophyll [C37], raise C<sub>4</sub> product concentration in the  
289 mesophyll [C40], and slow mesophyll CO<sub>2</sub> fixation [C32-C35]. This reaction sequence  
290 simulates the progressive inhibition of C<sub>3</sub> and C<sub>4</sub> carboxylation hypothesized by Sawada  
291 et al. (2002) following partial removal of C sinks in C<sub>4</sub> plants.

## 292 **Appendix D: Soil water, heat, gas and solute fluxes**

### 293 **Surface water flux**

294 Surface runoff is modelled using Manning's equation [D1] with surface water  
295 velocity ( $v$ ) [D3] calculated from surface geometry [D5a] and slope [D5b], and with

296 surface water depth ( $d$ ) [D2] calculated from surface water balance [D4] using kinematic  
297 wave theory.

### 298 **Subsurface water flux**

299 Subsurface water flow [D7] is calculated from Richard's equation using bulk soil  
300 water potentials ( $\psi_s$ ) of both cells if both source and destination cells are unsaturated  
301 [D9a], or Green-Ampt equation using  $\psi_s$  beyond the wetting front of the unsaturated cell  
302 if either source or destination cell is saturated [D9b] (Grant et al., 2004). Subsurface  
303 water flow can also occur through macropores using Poiseuille-Hagen theory for laminar  
304 flow in tubes (Dimitrov et al., 2010), depending on inputs for macropore volume fraction.

### 305 **Exchange with water table**

306 If a water table is present in the model, subsurface boundary water fluxes between  
307 saturated boundary grid cells and a fixed external water table are calculated from lateral  
308 hydraulic conductivities of the grid cells, and from elevation differences and lateral  
309 distances between the grid cells and the external water table [D10]. These terms are  
310 determined from set values for the external water table depth ( $WTD_x$ ) of, and lateral  
311 distance ( $L_t$ ) to, an external water table.

### 312 **Surface heat flux**

313 Surface heat fluxes ( $G$ ) arising from closure of the energy balance at snowpack,  
314 surface litter and soil surfaces [D11] (Grant et al., 1999) drive conductive-convective  
315 fluxes among snowpack, surface litter and soil layers [D12]. These fluxes drive freezing-  
316 thawing ( $Q_f$ ) and changes temperatures ( $T$ ) in snowpack, surface litter and soil layers  
317 [D13].

### 318 **Gas flux**

319 All gases undergo volatilization-dissolution between the gaseous and aqueous  
320 phases in the soil [D14a] and root [D14b], and between the atmosphere and the aqueous  
321 phase at the soil surface [D15a], driven by gaseous-aqueous concentration differences  
322 calculated from solubility coefficients and coupled to diffusive uptake by roots [C14] and  
323 microbes [A17]. Gases also undergo convective-conductive transfer among soil layers  
324 driven by gaseous concentration gradients and diffusivities [D16a,b,c] calculated from  
325 air-filled porosities [D17a,b,c], and from each rooted soil layer directly to the atmosphere  
326 through roots driven by gaseous concentration gradients and diffusivities [D16d]  
327 calculated from root porosities [D17d]. Gases may also bubble upwards from soil zones  
328 in which the total partial pressure of all aqueous gases exceeds atmospheric pressure  
329 [D18].

### 330 **Solute flux**

331 All gaseous and non-gaseous solutes undergo convective-dispersive transfer  
332 among soil layers driven by aqueous concentration gradients and dispersivities [D19]  
333 calculated from water-filled porosity [D20] and water flow length [D21].

### 334 **Appendix E: Solute transformations**

#### 335 **Precipitation-dissolution equilibria**

336 Solution  $[\text{NH}_4^+]$ ,  $[\text{NO}_3^-]$  and  $[\text{H}_2\text{PO}_4^-]$  that drive  $U_{\text{NH}_4}$ ,  $U_{\text{NO}_3}$  and  $U_{\text{PO}_4}$  [C23] are  
337 controlled by precipitation, adsorption and ion pairing reactions (Grant and Heaney,  
338 1997; Grant et al., 2004), including precipitation-dissolution of  $\text{Al}(\text{OH})_3$ ,  $\text{Fe}(\text{OH})_3$ ,  
339  $\text{CaCO}_3$ ,  $\text{CaSO}_4$ ,  $\text{AlPO}_4$ ,  $\text{FePO}_4$ ,  $\text{Ca}(\text{H}_2\text{PO}_4)_2$ ,  $\text{CaHPO}_4$ , and  $\text{Ca}_5(\text{PO}_4)_3\text{OH}$  [E1 – E9],  
340 cation exchange between  $\text{Ca}^{2+}$ ,  $\text{NH}_4^+$  and other cations [E10 – E15], anion exchange

341 between adsorbed and soluble  $\text{H}_2\text{PO}_4^-$ ,  $\text{HPO}_4^{2-}$  and  $\text{OH}^-$  [E16 – E20], and ion pairing  
342 [E22 – E55].

343 Key governing equations for simulating net ecosystem productivity in *ecosys*.  
344 Variables input to the model appear in bold with values given in the *Definition of*  
345 *Variables* below.

## 346 **Appendix F: N<sub>2</sub> fixation**

### 347 **Rhizobial growth**

348 Modelling the activity of symbiotic N<sub>2</sub> fixing bacteria in roots follows a protocol  
349 similar to that of non-symbiotic N<sub>2</sub> fixing bacteria in soil. Respiration demand is driven  
350 by specific activity, microbial biomass ( $M_n$ ), and nonstructural C concentration ( $[\chi_n]$ ) in  
351 root nodules [F1], and is constrained by temperature [F2] and microbial N or P status  
352 [F3]. Nodule respiration ( $R$ ) is constrained by the extent to which O<sub>2</sub> uptake meets O<sub>2</sub>  
353 demand [F4] imposed by respiration demand [F5]. O<sub>2</sub> uptake is in turn constrained by  
354 rhizosphere [O<sub>2r</sub>] [F6a] which is controlled by radial diffusion of O<sub>2</sub> through soil water to  
355 roots and nodules [F6b]. Soil water [O<sub>2</sub>] is maintained by dissolution of O<sub>2</sub> from soil air  
356 which is in turn maintained by soil-atmosphere gas exchange and vertical diffusion  
357 (Grant, 2004).  $R_h$  is first allocated to maintenance respiration  $R_m$  [F7-F8] and the  
358 remainder if any is allocated to growth respiration  $R_g$  [F9]. If  $R_m$  exceeds  $R_h$ , the shortfall  
359 is made up from respiration of microbial protein C, forcing senescence and litterfall of  
360 associated non-protein C [F10-F11].

### 361 **N<sub>2</sub> fixation**

362 N<sub>2</sub> fixation  $V_{N_2}$  is driven by  $R_g$  [F12], but is constrained by accumulation of  
363 nonstructural N ( $V_n$ ) with respect to nonstructural C and P also required for microbial



364 growth in the nodule [F13].  $\nu_n$  is the product of  $V_{N_2}$ , so that [F12] simulates the inhibition  
365 of  $N_2$  fixation by its product (Postgate, 1998). The value of  $V_{N_2}$  is also limited by the  
366 additional N needed to maintain bacterial N content [ $N_n'$ ] of  $M_n$  [F12], so that  $N_2$  fixation  
367 is constrained by the need of nodule bacteria for N not met from other sources (Postgate,  
368 1998). Respiration required for  $N_2$  fixation  $R_{N_2}$  [F14] is subtracted from  $R_g$  [F15] when  
369 calculating microbial growth [F16-F18]. Microbial senescence drives N and P litterfall  
370 [F19-F20].

### 371 **Nodule-root exchange**

372 Exchange of nonstructural C, N and P between roots and nodules is driven by  
373 concentration gradients [F21-F23] created by generation, transfer and consumption of  
374 nonstructural C, N and P in shoots, roots, mycorrhizae and nodules. Nonstructural C is  
375 generated in shoots and transferred along concentration gradients to roots and thence to  
376 nodules [F21]. Nonstructural P is generated in roots and transferred along concentration  
377 gradients to shoots and nodules [F23]. Nonstructural N is generated in roots through  
378 mineral uptake and in nodules through gaseous fixation [F22]. Nonstructural C, N and P  
379 in nodules is determined by root-nodule exchange, by nodule respiration and fixation, and  
380 by remobilization from nodule litterfall [F24-F26].

381 Root nonstructural N ( $\nu_r$ ) may rise if high mineral N concentrations in soil sustain  
382 rapid N uptake by roots. Large  $\nu_r$  suppresses or even reverses the transfer of  $\nu_n$  from  
383 nodule to root [F22], raising  $\nu_n$  [F25] and hence suppressing  $V_{N_2}$  [F12-F13]. Large  $\nu_r$   
384 also accelerates the consumption of  $\chi_r$ , slowing its transfer to nodules [F21], reducing  
385  $\chi_n$  [F24] and hence slowing nodule growth [F1]. Conversely, slow root N uptake

386 caused by low soil mineral N concentrations would lower  $v_{rt}$  and raise  $\chi_{rt}$ , hastening the  
387 transfer of  $v_n$  from nodule to root and of  $\chi_{rt}$  from root to nodule, lowering  $v_n$ , raising  $\chi_n$ ,  
388 and accelerating  $V_{N_2}$ . However [F13] also allows  $V_{N_2}$  to be constrained by nonstructural C  
389 and P concentrations arising from CO<sub>2</sub> fixation and root P uptake.

## 390 **Appendix G: CH<sub>4</sub> production and consumption**

### 391 **Anaerobic fermenters and H<sub>2</sub> producing acetogens**

392 The states  $S_{i,j,k}$ ,  $B_{i,k}$  and  $Z_{i,j,k}$  in *ecosys* are substrates for hydrolysis by all active ( $j$   
393 =  $a$ ) heterotrophic biomass communities ( $M_{i,n,a}$ ) [G1-G7] (Grant et al., 1993a), which  
394 include fermenters plus acetogens. Hydrolysis products are transferred to soluble organic  
395 matter ( $DOC_{i,k}$ ) which is the substrate for respiration and uptake by microbial biomass  
396 ( $M_{i,n,j}$ ) as described for aerobic heterotrophs [G11] (Grant et al., 1993a). Respiration ( $R_{i,f}$ )  
397 of  $DOC_{i,c}$  by fermenters plus acetogens ( $n = f$ ) is a Michaelis-Menten function of  $[DOC_{i,c}]$   
398 inhibited by O<sub>2</sub> [G1]. Respiration products are partitioned among  $A_{i,c}$ , CO<sub>2</sub> and H<sub>2</sub> according  
399 to Brock and Madigan (1991) [G2].  $R_{i,f}$  beyond that used for maintenance respiration drives  
400 the uptake of additional  $DOC_{i,c}$  [G3] for microbial growth according to the growth yield ( $Y_f$ )  
401 from fermentation [G4]. The growth yield from fermentation is calculated by dividing the  
402 free energy change of fermentation, adjusted for H<sub>2</sub> product concentration [G5], by the  
403 energy required to transform soluble organic C into microbial C [G4]. Change in  $M_{i,f,j}$  is  
404 thus the difference between uptake and respiration of  $DOC_{i,c}$ , less decomposition [G6]. This  
405 change determines  $M_{i,f,a}$  used in the following calculation of  $R_{i,f}$  [G1]. Ratios of  $M_{i,f,j,c}$  to  
406  $M_{i,f,j,n}$  determine mineralization-immobilization of N [G23] (Grant et al., 1993a).  
407 Decomposition products ( $D_{i,f,j,k}$ ) are partitioned to microbial residues ( $Z_{i,j,k}$ ) and soil

408 organic matter ( $S_{i,j,k}$ ) (where  $i$  = passive soil organic matter) [G26-G28] (Grant et al., 1993a)  
409 which undergo further hydrolysis.

#### 410 **Acetotrophic methanogens**

411 The fermenter product ( $A_{i,c}$ ) [G2] is the substrate for respiration ( $R_{i,m}$ ) by  
412 acetotrophic methanogens ( $n = m$ ) [G7]. Respiration products are partitioned between  $\text{CH}_4$   
413 and  $\text{CO}_2$  according to Brock and Madigan (1991) [G8].  $R_{i,m}$  beyond that used for  
414 maintenance respiration drives the uptake of additional  $A_{i,c}$  [G9] for microbial growth  
415 according to the growth yield ( $Y_m$ ) of acetotrophic methanogenesis [G10]. This growth yield  
416 is calculated by dividing the free energy change of acetotrophic methanogenesis (Brock and  
417 Madigan, 1991) by the energy required to transform acetate into microbial C. Acetogenic  
418 methanogens in the model use acetate as their sole carbon and energy source (Smith and  
419 Mah, 1980). Change in  $M_{i,m,j}$  is thus the difference between uptake and respiration of  $A_{i,c}$ ,  
420 less decomposition [G11]. This change determines  $M_{i,m,a}$  used in the following calculation  
421 of  $R_{i,m}$  [G7]. Mineralization and decomposition processes are the same as those for other  
422 microbial populations.

#### 423 **Hydrogenotrophic methanogens**

424 The fermenter products  $\text{CO}_2$  and  $\text{H}_2$  [G2] are the substrates for  $\text{CO}_2$  reduction by  
425 hydrogenotrophic methanogens ( $n = h$ ) which are assumed to be autotrophic [G12].  
426 Respiration products are partitioned between  $\text{CH}_4$  and  $\text{H}_2\text{O}$  according to Brock and Madigan  
427 (1991) [G13].  $R_h$  beyond that used for maintenance respiration drives the uptake of  
428 additional  $\text{CO}_2$  [G14] for microbial growth according to the growth yield ( $Y_h$ ) of  
429 hydrogenotrophic methanogenesis (Brock and Madigan, 1991) [G15]. This growth yield is  
430 calculated by dividing the free energy change of hydrogenotrophic methanogenesis, adjusted

431 for  $H_2$  substrate concentration [G16], by the energy required to transform  $CO_2$  into microbial  
432 C. Change in  $M_{h,j}$  is thus the difference between uptake and respiration of  $CO_2$ , less  
433 decomposition [G17]. This change determines  $M_{h,a}$  used in the following calculation of  $R_h$   
434 [G12]. Mineralization and decomposition processes are the same as those for other microbial  
435 populations.

#### 436 **Autotrophic methanotrophs**

437 Methane generated by acetotrophic and hydrogenotrophic methanogens is the  
438 substrate for  $CH_4$  oxidation by autotrophic methanotrophs ( $n = t$ ) [G18]. The stoichiometry  
439 and energetics of the methanotrophic reactions [G22-G24] are based on those of  $CH_4$  to  $CO_2$   
440 in Brock and Madigan (1991). The oxidation of  $CH_4$  to  $CO_2$  is coupled through an energy  
441 yield with the oxidation of  $CH_4$  to organic C used in microbial respiration [G19]. The energy  
442 yield from  $CH_4$  oxidation is calculated by dividing the free energy change of  $CH_4$  oxidation  
443 by the energy required to transform  $CH_4$  into organic C [G20]. Oxygen requirements to  
444 sustain  $CH_4$  oxidation rates are then calculated from the stoichiometries of  $CH_4$  oxidation  
445 [G22-G23] and aerobic microbial respiration [G24]. The  $O_2$  concentrations at  
446 methanotrophic microsites are then found at which active  $O_2$  uptake driven by requirements  
447 for  $CH_4$  oxidation equals spherical  $O_2$  diffusion to the microsites from the soil solution.  
448 These microsites are considered to be uniformly distributed on soil surfaces and are separated  
449 from the soil atmosphere (if present) by a water film of uniform thickness that depends upon  
450 soil water potential. The  $O_2$  uptake by each aerobic microbial population in the model  
451 competes with that by all other aerobic microbial populations (e.g. Grant and Rochette, 1994;  
452 Grant, 1995), and is constrained by  $O_2$  transfer rates through the gaseous and aqueous phases  
453 of the soil profile. The ratio of  $O_2$  uptake to  $O_2$  requirement ( $f_{O_2t}$ ) is then used to constrain

454 CH<sub>4</sub> oxidation rates [G21] so that CH<sub>4</sub> oxidation is stoichiometrically coupled to O<sub>2</sub> uptake.  
455 Growth respiration by methanotrophs is calculated as the difference between total respiration  
456 (R<sub>t</sub>) from eq. [G21b] and maintenance respiration (R<sub>mt</sub>) from eqs. [G18-G19] (Grant et al.,  
457 1993a). Growth respiration drives the uptake and transformation of additional CH<sub>4</sub> into  
458 microbial biomass (M<sub>t,c</sub>) [G25]) according to the growth yield. This yield is calculated by  
459 dividing the free energy change of CH<sub>4</sub> oxidation (Brock and Madigan, 1991) [G18] by the  
460 energy required to construct new microbial biomass from CH<sub>4</sub> [G26]. Net growth of the  
461 methanotrophic population M<sub>t,j,c</sub> is calculated as the uptake of CH<sub>4</sub>-C minus respiration and  
462 decomposition of assimilated C [G27]. This change determines M<sub>t,a</sub> used in the following  
463 calculation of X'<sub>t</sub> [G18]). Mineralization and decomposition processes are the same as those  
464 for other microbial populations.

465 This submodel of autotrophic methanotrophy has been used to simulate  
466 methanotrophic growth yields, specific growth rates, CH<sub>4</sub> concentration profiles and the  
467 sensitivity of CH<sub>4</sub> uptake to temperature and water content in soil columns (Grant, 1999).  
468 The combined submodels of anaerobic fermentation, acetotrophic methanogenesis,  
469 hydrogenotrophic methanogenesis and autotrophic methanotrophy have been used to  
470 simulate methanogenic growth yields, specific growth rates, and the time course of CH<sub>4</sub>  
471 emissions from differently amended soil columns at different temperatures (Grant, 1998b).  
472 All input parameter values used in eqs. [G1-G27] were derived from the microbiological  
473 literature and remain unchanged from those used in Grant (1998b) and in Grant (1999).

#### 474 **Appendix H: Inorganic N transformations**

##### 475 **Mineralization and immobilization of NH<sub>4</sub><sup>+</sup> by all microbial populations**

476 Each functional component ( $j$ ) ( $j$  = labile or resistant) of each microbial  
477 population ( $m$ ) ( $m$  = obligately aerobic bacteria, obligately aerobic fungi, facultatively  
478 anaerobic denitrifiers, anaerobic fermenters plus H<sub>2</sub>-producing acetogens, acetotrophic  
479 methanogens, hydrogenotrophic methanogens and methanotrophs, NH<sub>4</sub><sup>+</sup> and NO<sub>2</sub><sup>-</sup>  
480 oxidizers, and non-symbiotic diazotrophs) in each substrate-microbe complex ( $i$ ) ( $i$  =  
481 animal manure, coarse woody plant residue, fine non-woody plant residue, particulate  
482 organic matter, or humus) seeks to maintain a set C:N ratio by mineralizing NH<sub>4</sub><sup>+</sup> [H1a]  
483 or by immobilizing NH<sub>4</sub><sup>+</sup> [H1b] or NO<sub>3</sub><sup>-</sup> [H1c]. Provision is made for C:N ratios to rise  
484 above set values during immobilization, but at a cost to microbial function. These  
485 transformations control the exchange of N between organic and inorganic states.

#### 486 **Oxidation of DOC and reduction of O<sub>2</sub> by heterotrophs**

487 Constraints on heterotrophic oxidation of DOC imposed by O<sub>2</sub> uptake are solved  
488 in four steps:

- 489 1) DOC oxidation under non-limiting O<sub>2</sub> is calculated from active biomass and DOC  
490 concentration [H2],
- 491 2) O<sub>2</sub> reduction under non-limiting O<sub>2</sub> is calculated from 1) using a set respiratory  
492 quotient [H3],
- 493 3) O<sub>2</sub> reduction under ambient O<sub>2</sub> is calculated from radial O<sub>2</sub> diffusion through water  
494 films of thickness determined by soil water potential [H4a] coupled with active uptake  
495 at heterotroph surfaces driven by 2) [H4b]. O<sub>2</sub> diffusion and active uptake is  
496 population-specific, allowing the development of more anaerobic conditions at  
497 microbial surfaces associated with more biologically active substrates. O<sub>2</sub> uptake by

498 heterotrophs also accounts for competition with O<sub>2</sub> uptake by nitrifiers, roots and  
499 mycorrhizae,

500 4) DOC oxidation under ambient O<sub>2</sub> is calculated from 2) and 3) [H5]. The energy yield  
501 of DOC oxidation drives the uptake of additional DOC for construction of microbial  
502 biomass ( $M_{i,h}$ ) according to construction energy costs of each heterotrophic population  
503 [H7-H13] in Grant and Pattey (2003). Energy costs of denitrifiers are slightly larger  
504 than those of obligate heterotrophs, placing denitrifiers at a competitive disadvantage  
505 for growth and hence DOC oxidation if electron acceptors other than O<sub>2</sub> are not used.

#### 506 **Oxidation of DOC and reduction of NO<sub>3</sub><sup>-</sup>, NO<sub>2</sub><sup>-</sup> and N<sub>2</sub>O by denitrifiers**

507 Constraints imposed by NO<sub>3</sub><sup>-</sup> availability on DOC oxidation by denitrifiers are  
508 solved in five steps:

509 1) NO<sub>3</sub><sup>-</sup> reduction under non-limiting NO<sub>3</sub><sup>-</sup> is calculated from a fraction of electrons  
510 demanded by DOC oxidation but not accepted by O<sub>2</sub> because of diffusion limitations  
511 [H6],

512 2) NO<sub>3</sub><sup>-</sup> reduction under ambient NO<sub>3</sub><sup>-</sup> is calculated from 1) [H7],

513 3) NO<sub>2</sub><sup>-</sup> reduction under ambient NO<sub>2</sub><sup>-</sup> is calculated from demand for electrons not met by  
514 NO<sub>3</sub><sup>-</sup> in 2) [H8],

515 4) NO<sub>2</sub><sup>-</sup> reduction under ambient NO<sub>2</sub><sup>-</sup> is calculated from demand for electrons not met by  
516 NO<sub>2</sub><sup>-</sup> in 3) [H9],

517 5) additional DOC oxidation enabled by NO<sub>x</sub> reduction in 2), 3) and 4) is added to that  
518 enabled by O<sub>2</sub> reduction from [H5], the energy yield of which drives additional DOC  
519 uptake for construction of  $M_{i,n}$ . This additional uptake offsets the disadvantage  
520 incurred by the larger construction energy costs of denitrifiers.

521 **Oxidation of NH<sub>3</sub> and reduction of O<sub>2</sub> by nitrifiers**

522 Constraints on nitrifier oxidation of NH<sub>3</sub> imposed by O<sub>2</sub> uptake are solved in four  
523 steps:

524 1) substrate (NH<sub>3</sub>) oxidation under non-limiting O<sub>2</sub> is calculated from active biomass and  
525 from NH<sub>3</sub> and CO<sub>2</sub> concentrations [H11],

526 2) O<sub>2</sub> reduction under non-limiting O<sub>2</sub> is calculated from 1) using set respiratory  
527 quotients [H12],

528 3) O<sub>2</sub> reduction under ambient O<sub>2</sub> is calculated from radial O<sub>2</sub> diffusion through water  
529 films of thickness determined by soil water potential [H13a] coupled with active  
530 uptake at nitrifier surfaces driven by 2) [H13b]. O<sub>2</sub> uptake by nitrifiers also accounts  
531 for competition with O<sub>2</sub> uptake by heterotrophic DOC oxidizers, roots and  
532 mycorrhizae,

533 4) NH<sub>3</sub> oxidation under ambient O<sub>2</sub> is calculated from 2) and 3) [H14]. The energy yield  
534 of NH<sub>3</sub> oxidation drives the fixation of CO<sub>2</sub> for construction of  $M_{i,n}$  according to  
535 construction energy costs of each nitrifier population [H32-H34] in Grant and Pattey  
536 (2003).

537 **Oxidation of NO<sub>2</sub><sup>-</sup> and reduction of O<sub>2</sub> by nitrifiers**

538 Constraints on nitrifier oxidation of NO<sub>2</sub><sup>-</sup> imposed by O<sub>2</sub> uptake [H15-H18] are  
539 solved in the same way as are those of NH<sub>3</sub> [H11-H14]. The energy yield of NO<sub>2</sub><sup>-</sup>  
540 oxidation drives the fixation of CO<sub>2</sub> for construction of  $M_{i,o}$  according to construction  
541 energy costs of each nitrifier population.

542 **Oxidation of NH<sub>3</sub> and reduction of NO<sub>2</sub><sup>-</sup> by nitrifiers**



543            Constraints on nitrifier oxidation imposed by  $\text{NO}_2^-$  availability are solved in three  
544 steps:

- 545 1)  $\text{NO}_2^-$  reduction under non-limiting  $\text{NO}_2^-$  is calculated from a fraction of electrons  
546 demanded by  $\text{NH}_3$  oxidation but not accepted by  $\text{O}_2$  because of diffusion limitations  
547 [H19],
- 548 2)  $\text{NO}_2^-$  reduction under ambient  $\text{NO}_2^-$  and  $\text{CO}_2$  is calculated from step (1) [H20],  
549 competing for  $\text{NO}_2^-$  with [H18],
- 550 3) additional  $\text{NH}_3$  oxidation enabled by  $\text{NO}_2^-$  reduction in 2) [H21] is added to that  
551 enabled by  $\text{O}_2$  reduction from [H14]. The energy yield from this oxidation drives the  
552 fixation of additional  $\text{CO}_2$  for construction of  $M_{i,n}$ .

## Equations and definitions of variables

### Appendix A: Soil C, N and P transformations

#### Decomposition

|                                                                                        |                                                            |       |
|----------------------------------------------------------------------------------------|------------------------------------------------------------|-------|
| $D_{S_{i,j},l,C} = D'_{S_{i,j},l,C} M_{i,d,l,C} f_{\text{igl}}(S_{i,l,C} / G_{i,l,C})$ | decomposition of litter, POC,<br>humus                     | [A1a] |
| $D_{Z_{i,j},l,C} = D'_{Z_{i,j},l,C} M_{i,d,l,C} f_{\text{igl}}(Z_{i,l,C} / G_{i,l,C})$ | decomposition of microbial<br>residues                     | [A1b] |
| $D_{A_{i,l},C} = D'_{A_{i,l},C} M_{i,d,l,C} f_{\text{igl}}(A_{i,l,C} / G_{i,l,C})$     | decomposition of adsorbed SOC                              | [A1c] |
| $S_{i,l,C} = \sum_j S_{i,j,l,C}$                                                       | total C in all kinetic components<br>of litter, POC, humus | [A2a] |
| $Z_{i,l,C} = \sum_j Z_{i,j,l,C}$                                                       | total C in all kinetic components<br>of microbial residues | [A2b] |
| $G_{i,l,C} = S_{i,l,C} + Z_{i,l,C} + A_{i,l,C}$                                        | total C in substrate-microbe<br>complexes                  | [A2c] |

$$M_{i,d,l,C} = M_{i,a,l,C} + \mathbf{q}_m (M_{i,a,l,C} G_{ix,l,C} - M_{ix,a,l,C} G_{i,l,C}) / (G_{ix,l,C} + G_{i,l,C})$$

redistribution of active microbial [A3a]

$$M_{i,a,l,C} = \sum_n M_{i,n,a,l,C}$$

biomass from each substrate-  
microbe complex  $i$  to other [A3b]

$$D'_{S_{i,j,l,C}} = \{D_{S_{j,C}}[S_{i,j,l,C}]\} / \{[S_{i,j,l,C}] + K_{mD}(1.0 + [\sum M_{i,d,l,C}] / K_{iD})\}$$

substrate-microbe complexes  $ix$   
according to concentration  
differences (priming) [A4a]

$$D'_{Z_{i,j,l,C}} = \{D_{Z_{j,C}}[Z_{i,j,l,C}]\} / \{[Z_{i,j,l,C}] + K_{mD}(1.0 + [M_{i,d,l,C}] / K_{iD})\}$$

substrate and water constraint on  
 $D$  from colonized litter, POC and  
humus, microbial residues and  
adsorbed SOC [A4b]

$$D'_{A_{i,l,C}} = \{D_{A,C}[A_{i,l,C}]\} / \{[A_{i,l,C}] + K_{mD}(1.0 + [M_{i,d,l,C}] / K_{iD})\}$$

[A4c]

$$\delta S_{i,j,k,l,C} / \delta t = \beta \sum_n (U_{i,n,l,C} - R_{hi,n,l}) (S'_{i,j,k,l,C} / S'_{i,j,l,C}) \{ (S'_{i,j,l,C} / S_{i,j,l,C}) / (S'_{i,j,l,C} / S_{i,j,l,C} + K_{iS}) \}$$

colonized litter determined by [A5]

microbial growth into uncolonized  
litter

$$f_{\text{gl}} = T_{sl} \{ e^{[B - H_a / (RT_{sl})]} \} / \{ 1 + e^{[(H_{dl} - ST_{sl}) / (RT_{sl})]} + e^{[(ST_{sl} - H_{dh}) / (RT_{sl})]} \}$$

Arrhenius function for  $D$  and  $R_h$  [A6]

$$D_{S_{i,j,l,N,P}} = D_{S_{i,j,l,C}}(S_{i,j,l,N,P}/S_{i,j,l,C})$$

N and P coupled with C during  $D$  [A7a]

$$D_{Z_{i,j,l,N,P}} = D_{Z_{i,j,l,C}}(Z_{i,j,l,N,P}/Z_{i,j,l,C})$$

[A7b]

$$D_{A_{i,l,N,P}} = D_{A_{i,l,C}}(A_{i,l,N,P}/A_{i,l,C})$$

[A7c]

$$Y_{i,l,C} = k_{ts}(G_{i,l,C} F_s [Q_{i,l,C}]^b - X_{i,l,C})$$

Freundlich sorption of DOC [A8]

$$Y_{i,l,N,P} = Y_{i,l,C}(Q_{i,l,N,P}/Q_{i,l,C})$$

( $Y_{i,l,C} > 0$ ) adsorption of [A9]

DON, DOP

$$Y_{i,l,N,P} = Y_{i,l,C}(X_{i,l,N,P}/X_{i,l,C})$$

( $Y_{i,l,C} < 0$ ) desorption of [A10]

DON, DOP

## Microbial growth

$$R_h = \sum_i \sum_n \sum_l R_{hi,n,l}$$

[A11]

$$R_{hi,n,l} = R'_{hn} \min\{C_{Ni,n,l,a}/C_{Nj}, C_{Pi,n,l,a}/C_{Pj}\}$$

$R_h$  constrained by microbial N, P [A12]

$$R'_{hi,n,l} = M_{i,n,a,l,C} \{R_{hi,n,l} [Q_{i,l,C}]\} / \{(K_{mQC} + [Q_{i,l,C}])\} f_{vgl} f_{\psi gl}$$

$R_h$  constrained by substrate DOC [A13]

$$R_{hi,n,l} = R'_{hi,n,l} (U_{O2i,n,l} / U'_{O2i,n,l})$$

$R_h$  constrained by  $O_2$  [A14]

$$f_{\psi gl} = 1.0 - 6.67(1.0 - e^{(M\psi_s/(RT_s))})$$

$\psi_s$  constraints on microbial growth [A15]

$$U'_{O_2i,n,l} = 2.67R'_h{}_{i,n,l}$$

$$U_{O_2i,n,l} = U'_{O_2i,n,l} [O_{2mi,n,l}] / ([O_{2mi,n,l}] + K_{O_2})$$

$$= 4\pi n M_{i,n,a,l,C} D_{sO_2} [r_m r_{wl} / (r_{wl} - r_m)] ([O_{2sl}] - [O_{2mi,n,l}])$$

$$R_{mi,n,j,l} = R_m M_{i,n,j,l,N} f_{tml}$$

$$f_{tml} = e^{[y(T_{sl} - 298.16)]}$$

$$R_{gi,n,l} = R_{hi,n,l} - \sum_j R_{mi,n,j,l}$$

$$U_{i,n,l,C} = \min(R_{hi,n,l}, \sum_j R_{mi,n,j,l}) + R_{gi,n,l} (1 + \Delta G_x / E_m)$$

$$U_{i,n,l,N,P} = U_{i,n,l} Q_{i,l,N,P} / Q_{i,l,C}$$

$$D_{Mi,n,j,l,C} = D_{Mi,j} M_{i,n,j,C} f_{fg}$$

$$D_{Mi,n,j,N,P} = D_{Mi,j} M_{i,n,j,l,N,P} f_{gl} f_{di,n,l,N,P}$$

$$\delta M_{i,n,j,l,C} / \delta t = F_j U_{i,n,l,C} - F_j R_{hi,n,l} - D_{Mi,n,j,l,C}$$

$$\delta M_{i,n,j,l,C} / \delta t = F_j U_{i,n,l,C} - R_{mi,n,j,l} - D_{Mi,n,j,l,C}$$

## Microbial nutrient exchange

O<sub>2</sub> demand driven by potential  $R_h$  [A16]

active uptake coupled with radial  
diffusion of O<sub>2</sub> [A17a]

[A17b]

[A18]

[A19]

[A20]

DOC uptake driven by  $R_g$  [A21]

DON,DOP uptake driven by  $U_{i,n,l,C}$  [A22]

first-order decay of microbial C, [A23]

partial release of microbial N, P [A24]

$[R_{hi,n,l} > R_{mi,n,j,l}]$  growth [A25a]

$[R_{hi,n,l} < R_{mi,n,j,l}]$  senescence [A25b]

$$U_{\text{NH}_4 i,n,j,l} = (M_{i,n,j,l,C} C_{\text{Nj}} - M_{i,n,j,l,N}) \quad U_{\text{NH}_4} < 0 \quad \text{mineralization} \quad [\text{A26a}]$$

$$U_{\text{NH}_4 i,n,j,l} = \min\{(M_{i,n,j,l,C} C_{\text{Nj}} - M_{i,n,j,l,N}),$$

$$U'_{\text{NH}_4} a_{i,n,j,l} ([\text{NH}_4^+_{i,n,j,l}] - [\text{NH}_4^+_{\text{mn}}]) / ([\text{NH}_4^+_{i,n,j,l}] - [\text{NH}_4^+_{\text{mn}}] + K_{\text{NH}_4})\} \quad U_{\text{NH}_4} > 0 \quad \text{immobilization} \quad [\text{A26b}]$$

$$U_{\text{NO}_3 i,n,j,l} = \min\{(M_{i,n,j,l,C} C_{\text{Nj}} - (M_{i,n,j,l,N} + U_{\text{NH}_4 i,n,j,l})) ,$$

$$U'_{\text{NO}_3} a_{i,n,j,l} ([\text{NO}_3^-_{i,n,j,l}] - [\text{NO}_3^-_{\text{mn}}]) / ([\text{NO}_3^-_{i,n,j,l}] - [\text{NO}_3^-_{\text{mn}}] + K_{\text{NO}_3})\} \quad U_{\text{NO}_3} > 0 \quad \text{immobilization} \quad [\text{A26c}]$$

$$U_{\text{PO}_4 i,n,j,l} = (M_{i,n,j,l,C} C_{\text{Pj}} - M_{i,n,j,l,P}) \quad U_{\text{PO}_4} < 0 \quad \text{mineralization} \quad [\text{A26d}]$$

$$U_{\text{PO}_4 i,n,j,l} = \min\{(M_{i,n,j,l,C} C_{\text{Pj}} - M_{i,n,j,l,P}),$$

$$U'_{\text{PO}_4} A_{i,n,j,l} ([\text{H}_2\text{PO}_4^-_{i,n,j,l}] - [\text{H}_2\text{PO}_4^-_{\text{mn}}]) / ([\text{H}_2\text{PO}_4^-_{i,n,j,l}] - [\text{H}_2\text{PO}_4^-_{\text{mn}}] + K_{\text{PO}_4})\} \quad U_{\text{PO}_4} > 0 \quad \text{immobilization} \quad [\text{A26e}]$$

$$\Phi_{i,n=f,j,l} = \max\{0, M_{i,n=f,j,l,C} C_{\text{Nj}} - M_{i,n=f,j,l,N} - \max\{0, U_{i,n=f,j,l,N}\}\} \quad \text{N}_2 \text{ fixation driven by N deficit of} \quad [\text{A27}]$$

diazotrophic population

$$R_{\Phi i,n=f,j,l} = E_{\Phi} \Phi_{i,n=f,j,l} \quad [\text{A28}]$$

$$\delta M_{i,n,j,l,N} / \delta t = F_j U_{i,n,l,N} + U_{NH_4,i,n,j,l} + U_{NO_3,i,n,j,l} + \Phi_{i,n=f,j,l} - D_{M_{i,n,j,l,N}}$$

growth vs. losses of microbial N, P [A29a]

$$\delta M_{i,n,j,l,P} / \delta t = F_j U_{i,n,l,P} + U_{PO_4,i,n,j,l} - D_{M_{i,n,j,l,P}}$$

[A29b]

$$M_{i,n,a,l,C} = M_{i,n,j=labile,l,C} + M_{i,n,j=resistant,l,C} F_r / F_1$$

[A30a]

## Humification

$$H_{S_{i,j}=\text{lignin},l,C} = D_{S_{i,j}=\text{lignin},l,C}$$

decomposition products of litter [A31]

$$H_{S_{i,j}=\text{lignin},l,N,P} = D_{S_{i,j}=\text{lignin},l,N,P}$$

added to POC depending on lignin [A32]

$$H_{S_{i,j} \neq \text{lignin},l,C} = H_{S_{i,j}=\text{lignin},l,C} L_{hj}$$

[A33]

$$H_{S_{i,j} \neq \text{lignin},l,N,P} = H_{S_{i,j} \neq \text{lignin},l,C} S_{i,l,N,P} / S_{i,l,C}$$

[A34]

$$H_{M_{i,n,j,l,C}} = D_{M_{i,n,j,l,C}} F_h$$

decomposition products of [A35]

$$H_{M_{i,n,j,l,N,P}} = H_{M_{i,n,j,l,C}} M_{i,n,j,l,N,P} / M_{i,n,j,l,C}$$

microbes added to humus [A36]

depending on clay

## Definition of variables in appendix A

| Variable          | Definition | Unit | Equation | Value | Reference |
|-------------------|------------|------|----------|-------|-----------|
| <i>Subscripts</i> |            |      |          |       |           |

|          |                                                                                                                                                                                                            |
|----------|------------------------------------------------------------------------------------------------------------------------------------------------------------------------------------------------------------|
| <i>i</i> | substrate-microbe complex: coarse woody litter, fine non-woody litter, POC, humus                                                                                                                          |
| <i>j</i> | kinetic component: labile <i>l</i> , resistant <i>r</i> , active <i>a</i>                                                                                                                                  |
| <i>l</i> | soil or litter layer                                                                                                                                                                                       |
| <i>n</i> | microbial functional type: heterotrophic (bacteria, fungi), autotrophic (nitrifiers, methanotrophs), diazotrophic, obligate aerobe, facultative anaerobes (denitrifiers), obligate anaerobes (methanogens) |

*Variables*

|                           |                                                                       |                             |           |                                    |
|---------------------------|-----------------------------------------------------------------------|-----------------------------|-----------|------------------------------------|
| $A_{i,l,C}$               | mass of adsorbed SOC                                                  | $\text{g C m}^{-2}$         | [A1c,A2c] |                                    |
| $[A_{i,l,C}]$             | concentration of adsorbed SOC in soil                                 | $\text{g C Mg}^{-1}$        | [A4c]     |                                    |
| <i>a</i>                  | microbial surface area                                                | $\text{m}^2 \text{ m}^{-2}$ | [A26]     |                                    |
| <b><i>B</i></b>           | parameter such that $f_{\text{ig}} = 1.0$ at $T_l = 298.15 \text{ K}$ |                             | [A6]      | 26.230                             |
| <b><i>b</i></b>           | Freundlich exponent for sorption isotherm                             |                             | [A8]      | 0.85<br>Grant et al.<br>(1993a, b) |
| <b><math>\beta</math></b> | specific colonization rate of uncolonized substrate                   | -                           | [A5]      | 2.5<br>Grant et al.<br>[2010]      |
| $C_{\text{N,Pi,n,a,l}}$   | ratio of $M_{i,n,a,\text{N,P}}$ to $M_{i,n,a,\text{C}}$               | $\text{g N or P g C}^{-1}$  | [A12]     |                                    |



|                    |                                                                                                   |                                          |                |                                                                                                    |                            |
|--------------------|---------------------------------------------------------------------------------------------------|------------------------------------------|----------------|----------------------------------------------------------------------------------------------------|----------------------------|
| $C_{N,Pj}$         | maximum ratio of $M_{i,n,j,N,P}$ to $M_{i,n,j,C}$ maintained by $M_{i,n,j,C}$                     | g N or P g C <sup>-1</sup>               | [A12,A26,A27]  | 0.22 and 0.13<br>(N), 0.022 and<br>0.013 (P) for $j =$<br>labile and<br>resistant,<br>respectively | Grant et al.<br>(1993a, b) |
| $D_{Mi,j}$         | specific decomposition rate of $M_{i,n,j}$ at 30°C                                                | g C g C <sup>-1</sup> h <sup>-1</sup>    | [A23,A24]      | 0.0125 and<br>0.00035 for $j =$<br>labile and<br>resistant,<br>respectively                        | Grant et al.<br>(1993a, b) |
| $D_{Mi,n,j,l,C}$   | decomposition rate of $M_{i,n,j,l,C}$                                                             | g C m <sup>-2</sup> h <sup>-1</sup>      | [A23,A25,A35]  |                                                                                                    |                            |
| $D_{Mi,n,j,l,N,P}$ | decomposition rate of $M_{i,n,j,l,N,P}$                                                           | g N or P m <sup>-2</sup> h <sup>-1</sup> | [A24,A29]      |                                                                                                    |                            |
| $D_{sO_2l}$        | aqueous dispersivity–diffusivity of O <sub>2</sub> during microbial uptake in soil                | m <sup>2</sup> h <sup>-1</sup>           | [A17]          |                                                                                                    |                            |
| $D_{Ai,l,C}$       | decomposition rate of $A_{i,l,C}$ by $M_{i,d,l,C}$ producing $Q$ in [A13]                         | g C m <sup>-2</sup> h <sup>-1</sup>      | [A1c,A7c,A31c] |                                                                                                    |                            |
| $D_{Aj,C}$         | specific decomposition rate of $A_{i,l,C}$ by $M_{i,d,l,C}$ at 25°C and saturating[ $A_{i,l,C}$ ] | g C g C <sup>-1</sup> h <sup>-1</sup>    | [A4c]          | 0.025                                                                                              | Grant et al.<br>(1993a, b) |

|                     |                                                                                                              |                                         |                |                                                                                                          |
|---------------------|--------------------------------------------------------------------------------------------------------------|-----------------------------------------|----------------|----------------------------------------------------------------------------------------------------------|
| $D_{A_{i,j,l,N,P}}$ | decomposition rate of $A_{i,l,N,P}$ by $M_{i,d,l,C}$                                                         | $\text{g N or P m}^{-2} \text{ h}^{-1}$ | [A7c]          |                                                                                                          |
| $D'_{A_{i,j,l,C}}$  | specific decomposition rate of $S_{i,j,l,C}$ by $\Sigma_n M_{i,n,a,l}$ at 25°C                               | $\text{g C g C}^{-1} \text{ h}^{-1}$    | [A1a,A4c]      |                                                                                                          |
| $D_{S_{i,j,l,C}}$   | decomposition rate of $S_{i,j,l,C}$ by $\Sigma_n M_{i,n,a,l}$ producing $Q$ in [A13]                         | $\text{g C m}^{-2} \text{ h}^{-1}$      | [A1a,A7a,A31a] |                                                                                                          |
| $D_{S_{j,C}}$       | specific decomposition rate of $S_{i,j,l,C}$ by $\Sigma_n M_{i,n,a,l}$ at 25°C and saturating[ $S_{i,l,C}$ ] | $\text{g C g C}^{-1} \text{ h}^{-1}$    | [A4a]          | 1.0, 1.0, 0.15, and 0.025 for $j =$ protein, carbohydrate, cellulose, and lignin Grant et al. (1993a, b) |
| $D_{S_{i,j,l,N,P}}$ | decomposition rate of $S_{i,j,l,N,P}$ by $\Sigma_n M_{i,n,a,l}$                                              | $\text{g N or P m}^{-2} \text{ h}^{-1}$ | [A7a, A32]     |                                                                                                          |
| $D'_{S_{i,j,l,C}}$  | specific decomposition rate of $S_{i,j,l,C}$ by $\Sigma_n M_{i,n,a,l}$ at 25°C                               | $\text{g C g C}^{-1} \text{ h}^{-1}$    | [A1a,A4a]      |                                                                                                          |
| $D_{Z_{i,j,l,C}}$   | decomposition rate of $Z_{i,j,l,C}$ by $\Sigma_n M_{i,n,a,l}$ producing $Q$ in [A13]                         | $\text{g C m}^{-2} \text{ h}^{-1}$      | [A1b,A7b]      |                                                                                                          |
| $D_{Z_{i,j,N,P}}$   | decomposition rate of $Z_{i,j,l,N,P}$ by $\Sigma_n M_{i,n,a,l}$                                              | $\text{g N or P m}^{-2} \text{ h}^{-1}$ | [A7b]          |                                                                                                          |
| $D_{Z_{j,C}}$       | specific decomposition rate of $Z_{i,j,l,C}$ by $\Sigma_n M_{i,n,a,l}$ at 25°C and saturating[ $Z_{i,l,C}$ ] | $\text{g C g C}^{-1} \text{ h}^{-1}$    | [A4b]          | 0.25 and 0.05 for $j =$ labile and resistant biomass Grant et al. (1993a, b)                             |
| $D'_{Z_{i,j,l,C}}$  | specific decomposition rate of $Z_{i,j,l,C}$ by $\Sigma_n M_{i,n,a,l}$ at 25°C                               | $\text{g C g C}^{-1} \text{ h}^{-1}$    | [A1b,A4b]      |                                                                                                          |

|                |                                                                                                     |                       |               |                                                                                                                      |                           |
|----------------|-----------------------------------------------------------------------------------------------------|-----------------------|---------------|----------------------------------------------------------------------------------------------------------------------|---------------------------|
| $\Delta G_x$   | energy yield of C oxidation with different reductants $x$                                           | $\text{kJ g C}^{-1}$  | [A21]         | 37.5 ( $x = \text{O}_2$ );<br>4.43 ( $x = \text{DOC}$ )                                                              |                           |
| $E_m$          | energy requirement for growth of $M_{i,n,a,l}$                                                      | $\text{kJ g C}^{-1}$  | [A21]         | 25                                                                                                                   |                           |
| $E_\phi$       | energy requirement for non-symbiotic $\text{N}_2$ fixation by heterotrophic diazotrophs ( $n = f$ ) | $\text{g C g N}^{-1}$ | [A28]         | 5                                                                                                                    | Waring and Running (1998) |
| $F_h$          | fraction of products from microbial decomposition that are humified (function of clay content)      |                       | [A35]         | 0.167 +<br>0.167*clay                                                                                                |                           |
| $F_l$          | fraction of microbial growth allocated to labile component $M_{i,n,l}$                              |                       | [A25,A29,A30] | 0.55                                                                                                                 | Grant et al. (1993a, b)   |
| $F_r$          | fraction of microbial growth allocated to resistant component $M_{i,n,r}$                           |                       | [A25,A29,A30] | 0.45                                                                                                                 | Grant et al. (1993a, b)   |
| $F_s$          | equilibrium ratio between $Q_{i,l,C}$ and $H_{i,l,C}$                                               |                       | [A8]          |                                                                                                                      |                           |
| $f_{di,n,N,P}$ | fraction of N or P released with $D_{M_{i,n,j,l,C}}$ during decomposition                           | dimensionless         | [A24]         | 0.33 $U_{\text{NH}_4} > 0$<br>1.00 $U_{\text{NH}_4} < 0$<br>0.33 $U_{\text{PO}_4} > 0$<br>1.00 $U_{\text{PO}_4} < 0$ |                           |

|                                                |                                                                                     |                                          |                         |                       |                     |
|------------------------------------------------|-------------------------------------------------------------------------------------|------------------------------------------|-------------------------|-----------------------|---------------------|
| $f_{igt}$                                      | temperature function for microbial growth respiration                               | dimensionless                            | [A1,A6,A13,<br>A23,A24] |                       |                     |
| $f_{tml}$                                      | temperature function for maintenance respiration                                    | dimensionless                            | [A18,A19]               |                       |                     |
| $f_{\psi gl}$                                  | soil water potential function for microbial, root or mycorrhizal growth respiration | dimensionless                            | [A13,A15]               |                       | Pirt (1975)         |
| $\Phi_{i,n=f,j,l}$                             | non-symbiotic N <sub>2</sub> fixation by heterotrophic diazotrophs ( $n = f$ )      | g N m <sup>-2</sup> h <sup>-1</sup>      | [A27,A28,A29]           |                       |                     |
| $G_{i,l,C}$                                    | total C in substrate-microbe complex                                                | g C Mg <sup>-1</sup>                     | [A1,A2c,A3a,A8]         |                       |                     |
| [H <sub>2</sub> PO <sub>4</sub> <sup>-</sup> ] | concentration of H <sub>2</sub> PO <sub>4</sub> <sup>-</sup> in soil solution       | g P m <sup>-3</sup>                      | [A26]                   |                       |                     |
| $H_a$                                          | energy of activation                                                                | J mol <sup>-1</sup>                      | [A6,C10]                | 65 x 10 <sup>3</sup>  | Addiscott (1983)    |
| $H_{dh}$                                       | energy of high temperature deactivation                                             | J mol <sup>-1</sup>                      | [A6,C10]                | 225 x 10 <sup>3</sup> |                     |
| $H_{dl}$                                       | energy of low temperature deactivation                                              | J mol <sup>-1</sup>                      | [A6,C10]                | 198 x 10 <sup>3</sup> |                     |
| $H_{Mi,n,j,l,C}$                               | transfer of microbial C decomposition products to humus                             | g C m m <sup>-2</sup> h <sup>-1</sup>    | [A35,A36]               |                       |                     |
| $H_{Mi,n,j,l,N,P}$                             | transfer of microbial N or P decomposition products to humus                        | g N or P m <sup>-2</sup> h <sup>-1</sup> | [A36]                   |                       |                     |
| $H_{Si,j,l,C}$                                 | transfer of C hydrolysis products to particulate OM                                 | g C m <sup>-2</sup> h <sup>-1</sup>      | [A31,A32,A33,<br>A34]   |                       |                     |
| $H_{Si,j,l,N,P}$                               | transfer of N or P hydrolysis products to particulate OM                            | g N or P m <sup>-2</sup> h <sup>-1</sup> | [A32,A34]               |                       |                     |
| $K_{IS}$                                       | inhibition constant for microbial colonization of substrate                         | -                                        | [A5]                    | 0.5                   | Grant et al. (2010) |

|                   |                                                                                               |                               |       |                                                                                                  |                                 |
|-------------------|-----------------------------------------------------------------------------------------------|-------------------------------|-------|--------------------------------------------------------------------------------------------------|---------------------------------|
| $K_{\text{NH}_4}$ | M-M constant for $\text{NH}_4^+$ uptake at microbial surfaces                                 | $\text{g N m}^{-3}$           | [A26] | 0.40                                                                                             |                                 |
| $K_{\text{NO}_3}$ | M-M constant for $\text{NO}_3^-$ uptake at microbial surfaces                                 | $\text{g N m}^{-3}$           | [A26] | 0.35                                                                                             |                                 |
| $K_{\text{PO}_4}$ | M-M constant for $\text{H}_2\text{PO}_4^-$ uptake at microbial surfaces                       | $\text{g P m}^{-3}$           | [A26] | 0.125                                                                                            |                                 |
| $K_{iD}$          | inhibition constant for $[M_{i,n,a}]$ on $S_{i,C}$ , $Z_{i,C}$                                | $\text{g C m}^{-3}$           | [A4]  | 25                                                                                               | Lizama and                      |
| $K_{mD}$          | Michaelis–Menten constant for $D_{Si,j,C}$                                                    | $\text{g C Mg}^{-1}$          | [A4]  | 75                                                                                               | Suzuki (1990),                  |
| $K_{mQC}$         | Michaelis–Menten constant for $R'_{hi,n}$ on $[Q_{i,C}]$                                      | $\text{g C m}^{-3}$           | [A13] | 36                                                                                               | Grant et al.<br>(1993a, b)      |
| $K_{\text{O}_2}$  | Michaelis–Menten constant for reduction of $\text{O}_{2s}$ by microbes, roots and mycorrhizae | $\text{g O}_2 \text{ m}^{-3}$ | [A17] | 0.064                                                                                            | Griffin (1972)                  |
| $k_{ts}$          | equilibrium rate constant for sorption                                                        | $\text{h}^{-1}$               | [A8]  | 0.01                                                                                             | Grant et al.<br>(1993a, b)      |
| $L_{hj}$          | ratio of nonlignin to lignin components in humified hydrolysis products                       |                               | [A33] | 0.10, 0.05, and<br>0.05 for $j =$<br>protein,<br>carbohydrate, and<br>cellulose,<br>respectively | Shulten and<br>Schnitzer (1997) |

|                                       |                                                                                          |                     |                               |        |
|---------------------------------------|------------------------------------------------------------------------------------------|---------------------|-------------------------------|--------|
| $M$                                   | molecular mass of water                                                                  | $\text{g mol}^{-1}$ | [A15]                         | 18     |
| $M_{i,d,l,C}$                         | heterotrophic microbial C used for decomposition                                         | $\text{g C m}^{-2}$ | [A1,A3a,A4]                   |        |
| $M_{i,n,j,l,C}$                       | microbial C                                                                              | $\text{g C m}^{-2}$ | [A13,A17A23,A25,A26, A30,A36] |        |
| $M_{i,n,j,l,N}$                       | microbial N                                                                              | $\text{g N m}^{-2}$ | [A18,A27,A29]                 |        |
| $M_{i,n,j,l,P}$                       | microbial P                                                                              | $\text{g P m}^{-2}$ | [A24,A29,A26, A36]            |        |
| $M_{i,n,a,l,C}$                       | active microbial C from heterotrophic population $n$ associated with $G_{i,l,C}$         | $\text{g C m}^{-2}$ | [A3,A13,A17, A30]             |        |
| $[M_{i,n,a,l,C}]$                     | concentration of $M_{i,n,a}$ in soil water = $M_{i,n,a,l,C} / \theta_l$                  | $\text{g C m}^{-3}$ | [A3, A5]                      |        |
| $[\text{NH}_4^+_{i,n,j,l}]$           | concentration of $\text{NH}_4^+$ at microbial surfaces                                   | $\text{g N m}^{-3}$ | [A26]                         |        |
| $[\text{NH}_4^+_{\text{mm}}]$         | concentration of $\text{NH}_4^+$ at microbial surfaces below which $U_{\text{NH}_4} = 0$ | $\text{g N m}^{-3}$ | [A26]                         | 0.0125 |
| $[\text{NO}_3^-_{i,n,j,l}]$           | concentration of $\text{NO}_3^-$ at microbial surfaces                                   | $\text{g N m}^{-3}$ | [A26]                         |        |
| $[\text{NO}_3^-_{\text{mm}}]$         | concentration of $\text{NO}_3^-$ at microbial surfaces below which $U_{\text{NO}_3} = 0$ | $\text{g N m}^{-3}$ | [A26]                         | 0.03   |
| $[\text{H}_2\text{PO}_4^-_{i,n,j,l}]$ | concentration of $\text{H}_2\text{PO}_4^-$ at microbial surfaces                         | $\text{g N m}^{-3}$ | [A26]                         |        |

|                                             |                                                                                                                            |                                      |                           |        |
|---------------------------------------------|----------------------------------------------------------------------------------------------------------------------------|--------------------------------------|---------------------------|--------|
| $[\mathbf{H}_2\mathbf{PO}_4^-]_{\text{mm}}$ | concentration of $\text{H}_2\text{PO}_4^-$ at microbial surfaces below which $U_{\text{PO}_4} = 0$                         | $\text{g N m}^{-3}$                  | [A26]                     | 0.002  |
| $[\text{O}_{2\text{mi},n,l}]$               | $\text{O}_2$ concentration at heterotrophic microsities                                                                    | $\text{g O}_2 \text{ m}^{-3}$        | [A17]                     |        |
| $[\text{O}_{2\text{sl}}]$                   | $\text{O}_2$ concentration in soil solution                                                                                | $\text{g O}_2 \text{ m}^{-3}$        | [A17]                     |        |
| $Q_{i,l,C}$                                 | DOC from products of $D_{S_{i,j,l,C}}$ [A3] and $D_{Z_{i,j,l,C}}$ [A5]                                                     | $\text{g C m}^{-2}$                  | [A8,A13,A22]              |        |
| $[Q_{i,l,C}]$                               | solution concentration of $Q_{i,l,C}$                                                                                      | $\text{g C Mg}^{-1}$                 | [A8,A13]                  |        |
| $Q_{i,l,N,P}$                               | DON and DOP from products of $(D_{S_{i,j,l,N,P}} + D_{Z_{i,j,l,N,P}})$                                                     | $\text{g N or P m}^{-2}$             | [A9,A22]                  |        |
| $q_m$                                       | constant for reallocating $M_{i,a,l,C}$ to $M_{i,d,l,C}$                                                                   | -                                    | [A3a]                     | 0.5    |
| $R$                                         | gas constant                                                                                                               | $\text{J mol}^{-1} \text{ K}^{-1}$   | [A6,A15,C10]              | 8.3143 |
| $R_{\Phi_{i,n=fj,l}}$                       | respiration for non-symbiotic $\text{N}_2$ fixation by heterotrophic diazotrophs ( $n = f$ )                               | $\text{g C m}^{-2} \text{ h}^{-1}$   | [A28]                     |        |
| $R_{g_{i,n,l}}$                             | growth respiration of $M_{i,n,a,l}$ on $Q_{i,l,C}$ under nonlimiting $\text{O}_2$ and nutrients                            | $\text{g C g C}^{-1} \text{ h}^{-1}$ | [A20]                     |        |
| $R_h$                                       | total heterotrophic respiration of all $M_{i,n,a,l}$ under ambient DOC, $\text{O}_2$ , nutrients, $\theta$ and temperature | $\text{g C m}^{-2} \text{ h}^{-1}$   | [A11]                     |        |
| $R_{h_{i,n,l}}$                             | heterotrophic respiration of $M_{i,n,a,l}$ under ambient DOC, $\text{O}_2$ , nutrients, $\theta$ and temperature           | $\text{g C m}^{-2} \text{ h}^{-1}$   | [A5,A11,A14,A20, A21,A25] |        |

|                   |                                                                                                                         |                           |                   |                      |                              |
|-------------------|-------------------------------------------------------------------------------------------------------------------------|---------------------------|-------------------|----------------------|------------------------------|
| $R_{hi,n,l}$      | specific heterotrophic respiration of $M_{i,n,a,l}$ under nonlimiting $O_2$ , DOC, $\theta$ and $25^\circ C$            | $g\ C\ g\ C^{-1}\ h^{-1}$ | [A12,A13]         |                      |                              |
| $R'_{h'n}$        | specific heterotrophic respiration of $M_{i,n,a,l}$ under nonlimiting DOC, $O_2$ , nutrients, $\theta$ and $25^\circ C$ | $g\ C\ g\ C^{-1}\ h^{-1}$ | [A12]             | 0.125                | Shields et al. (1973)        |
| $R'_{h'_{i,n,l}}$ | heterotrophic respiration of $M_{i,n,a,l}$ under nonlimiting $O_2$ and ambient DOC, nutrients, $\theta$ and temperature | $g\ C\ m^{-2}\ h^{-1}$    | [A13,A14,A16]     |                      |                              |
| $R_m$             | specific maintenance respiration at $25^\circ C$                                                                        | $g\ C\ g\ N^{-1}\ h^{-1}$ | [A18]             | 0.0115               | Barnes et al. (1998)         |
| $R_{mi,n,j,l}$    | maintenance respiration by $M_{i,n,j,l}$                                                                                | $g\ C\ m^{-2}\ h^{-1}$    | [A18,A20,A21,A25] |                      |                              |
| $r_{wl}$          | radius of $r_m$ + water film at current water content                                                                   | m                         | [A17]             |                      |                              |
| $r_m$             | radius of heterotrophic microsite                                                                                       | m                         | [A17]             | $2.5 \times 10^{-6}$ |                              |
| $r_{wl}$          | thickness of water films                                                                                                | m                         | [A17]             |                      |                              |
| $S$               | change in entropy                                                                                                       | $J\ mol^{-1}\ K^{-1}$     | [A6,C10]          | 710                  | Sharpe and DeMichelle (1977) |
| $[S_{i,j,l,C}]$   | concentration of $S_{i,j,l,C}$ in soil                                                                                  | $g\ C\ Mg^{-1}$           | [A4a]             |                      |                              |



|                             |                                                                                      |                                         |                  |                      |
|-----------------------------|--------------------------------------------------------------------------------------|-----------------------------------------|------------------|----------------------|
| $S_{i,j,l,C}$               | mass of colonized litter, POC or humus C                                             | $\text{g C m}^{-2}$                     | [A2a,A5,A7a,A33] |                      |
| $S'_{i,j,l,C}$              | mass of uncolonized litter, POC or humus C                                           | $\text{g C m}^{-2}$                     | [A5]             |                      |
| $S_{i,j,l,N,P}$             | mass of litter, POC or humus N or P                                                  | $\text{g N or P m}^{-2}$                | [A7a,A33]        |                      |
| $T_{sl}$                    | soil temperature                                                                     | K                                       | [A6,A15.A19]     |                      |
| $U_{i,n,C}$                 | uptake of $Q_{i,l,C}$ by $\sum_n M_{i,n,a,l}$ under limiting nutrient availability   | $\text{g C m}^{-2} \text{ h}^{-1}$      | [A5,A21,A22,A25] |                      |
| $U_{i,n,N,P}$               | uptake of $Q_{i,l,N,P}$ by $\sum_n M_{i,n,a,l}$ under limiting nutrient availability | $\text{g N or P m}^{-2} \text{ h}^{-1}$ | [A22,A29]        |                      |
| $U_{\text{NH}_4^+,i,n,j,l}$ | $\text{NH}_4^+$ uptake by microbes                                                   | $\text{g N m}^{-2} \text{ h}^{-1}$      | [A26, A27,A29]   |                      |
| $U'_{\text{NH}_4}$          | maximum $U_{\text{NH}_4}$ at 25 °C and non-limiting $\text{NH}_4^+$                  | $\text{g N m}^{-2} \text{ h}^{-1}$      | [A26]            | $5.0 \times 10^{-3}$ |
| $U_{\text{NO}_3^-,i,n,j,l}$ | $\text{NO}_3^-$ uptake by microbes                                                   | $\text{g N m}^{-2} \text{ h}^{-1}$      | [A26,A27,A29]    |                      |
| $U'_{\text{NO}_3}$          | maximum $U_{\text{NO}_3}$ at 25 °C and non-limiting $\text{NO}_3^-$                  | $\text{g N m}^{-2} \text{ h}^{-1}$      | [A26]            | $5.0 \times 10^{-3}$ |
| $U_{\text{O}_2,i,n}$        | $\text{O}_2$ uptake by $M_{i,n,a,l}$ under ambient $\text{O}_2$                      | $\text{g m}^{-2} \text{ h}^{-1}$        | [A14,A17]        |                      |
| $U'_{\text{O}_2,i,n}$       | $\text{O}_2$ uptake by $M_{i,n,a,l}$ under nonlimiting $\text{O}_2$                  | $\text{g m}^{-2} \text{ h}^{-1}$        | [A14,A16,A17]    |                      |
| $U_{\text{PO}_4^-,i,n,j,l}$ | $\text{H}_2\text{PO}_4^-$ uptake by microbes                                         | $\text{g N m}^{-2} \text{ h}^{-1}$      | [A26,A27,A29]    |                      |
| $U'_{\text{PO}_4}$          | maximum $U_{\text{PO}_4}$ at 25 °C and non-limiting $\text{H}_2\text{PO}_4^-$        | $\text{g N m}^{-2} \text{ h}^{-1}$      | [A26]            | $5.0 \times 10^{-3}$ |

|                 |                                                  |                                     |             |       |
|-----------------|--------------------------------------------------|-------------------------------------|-------------|-------|
| $X_{i,l,C}$     | adsorbed C hydrolysis products                   | g C Mg <sup>-1</sup>                | [A8,A10]    |       |
| $X_{i,l,N,P}$   | adsorbed N or P hydrolysis products              | g P Mg <sup>-1</sup>                | [A10]       |       |
| $y$             | selected to give a $Q_{10}$ for $f_{tm}$ of 2.25 |                                     | [A19]       | 0.081 |
| $\psi_s$        | soil or residue water potential                  | MPa                                 | [A15]       |       |
| $Y_{i,l,C}$     | sorption of C hydrolysis products                | g C m <sup>-2</sup> h <sup>-1</sup> | [A8,A9,A10] |       |
| $Y_{i,l,N,P}$   | sorption of N or P hydrolysis products           | g P m <sup>-2</sup> h <sup>-1</sup> | [A9,A10]    |       |
| $[Z_{i,j,l,C}]$ | concentration of $Z_{i,j,l,C}$ in soil           | g C Mg <sup>-1</sup>                | [A4b]       |       |
| $Z_{i,j,l,C}$   | mass of microbial residue C in soil              | g C m <sup>-2</sup>                 | [A2b,A7b]   |       |
| $Z_{i,j,l,N,P}$ | mass of microbial residue N or P in soil         | g P m <sup>-2</sup>                 | [A7b]       |       |

## Appendix B: Soil-plant water relations

### Canopy transpiration

|                                                                                        |                                |       |
|----------------------------------------------------------------------------------------|--------------------------------|-------|
| $Rn_{ci} + LE_{ci} + H_{ci} + G_{ci} = 0$                                              | canopy energy balance          | [B1a] |
| $LE_{ci} = L (e_a - e_{ci(T_{ci}, \psi_{ci})})/r_{ai}$                                 | $LE$ from canopy evaporation   | [B1b] |
| $LE_{ci} = L (e_a - e_{ci(T_{ci}, \psi_{ci})})/(r_{ai} + r_{ci}) - LE_{ci}$ from [B1b] | $LE$ from canopy transpiration | [B1c] |
| $H_{ci} = \rho C_p (T_a - T_{ci})/r_{ai}$                                              | $H$ from canopy energy balance | [B1d] |

$$r_{c\text{mini}} = 0.64 (C_b - C_i') / V_c' i$$

$$r_{ci} = r_{c\text{mini}} + (r_{c\text{maxi}} - r_{c\text{mini}}) e^{(-\beta \psi_{ci})}$$

$$r_{ai} = \{ (\ln((z_u - z_{di})/z_{ri})^2 / (K^2 u_a)) / (1 - 10 Ri) \}$$

$$Ri = \{ g (z_u - z_{ri}) / (u_a^2 T_a) \} (T_a - T_c)$$

$$\psi_{ci} = \psi_{ci} - \psi_{\pi i}$$

### Root and mycorrhizal water uptake

$$U_{wi} = \sum_l \sum_r U_{wi,r,l}$$

$$U_{wi,r,l} = (\psi_{ci}' - \psi_{si}') / (\Omega_{si,r,l} + \Omega_{\pi i,r,l} + \sum_x \Omega_{ai,r,l,x})$$

$$\psi_{ci}' = \psi_{ci} + 0.01 z_{bi}$$

$$\psi_{si}' = \psi_{si} - 0.01 z_l$$

$$\Omega_{si,r,l} = \ln\{ (d_{i,r,l} / r_{i,r,l}) / (2\pi L_{i,r,l} \kappa_{i,r,l}) \} \theta_{wl} / \theta_{pl}$$

$$\Omega_{\pi i,r,l} = \Omega_{\pi i,r} / L_{i,r,l}$$

$$\Omega_{ai,r,l,x=1} = \Omega_{ai,r} z_l / \{ n_{i,r,l,1} (r_{i,r,l,1} / r'_{i,r})^4 \} + \gamma \Omega_{ai,r} z_{bi} / \{ n_{i,r,l,1} (r_{bi} / r_{bi}')^4 \} \sum_{i,r,l} (M_{i,r,l}) / M_{i,r,l}$$

$$\Omega_{ai,r,l,x=2} = \Omega_{ai,r} (L_{i,r,l,2} / n_{i,r,l,2}) / \{ n_{i,r,l,2} (r_{i,r,l,2} / r'_{i,r})^4 \}$$

$$\delta L_{i,r,l,1} / \delta \alpha = \delta M_{i,r,l,1} / \delta \alpha v_r / \{ \rho_r (1 - \theta_{p,i,r}) (\pi r_{i,r,l,1}^2) \}$$

$$r_c \text{ driven by rates of carboxylation} \quad [\text{B2a}]$$

$$\text{vs. diffusion} \quad [\text{B2b}]$$

$r_c$  constrained by water status

$$r_a \text{ driven by windspeed, surface} \quad [\text{B3a}]$$

$$r_a \text{ adjusted for stability vs.} \quad [\text{B3b}]$$

buoyancy

$$[\text{B4}]$$

$$U_w \text{ along hydraulic gradient} \quad [\text{B6}]$$

$$[\text{B7}]$$

$$[\text{B8}]$$

$$[\text{B9}]$$

$$[\text{B10}]$$

$$[\text{B11}]$$

$$[\text{B12}]$$

$$[\text{B13}]$$

## Canopy water potential

$$(e_a - e_{i(T_{ci})}) / (r_{ai} + r_{ci}) \text{ [B1]} = \sum_l \sum_i (\psi_{ci}' - \psi_s') / (\Omega_{si,r,l} + \Omega_{ri,r,l} + \sum_x \Omega_{ai,r,l,x}) + X_{ci} \delta \psi_{ci} / \delta t$$

$\psi_c$  solved when transpiration from [B14]

[B1-B4] (LHS) equals uptake from

[B5-B13] + change in storage

(RHS)

## Definition of variables in appendix B

| Variable          | Definition                                                                                                                           | Unit | Equation | Value | Reference |
|-------------------|--------------------------------------------------------------------------------------------------------------------------------------|------|----------|-------|-----------|
| <i>Subscripts</i> |                                                                                                                                      |      |          |       |           |
| <i>I</i>          | plant species or functional type: coniferous, deciduous,<br>annual, perennial, C <sub>3</sub> , C <sub>4</sub> , monocot, dicot etc. |      |          |       |           |
| <i>J</i>          | branch or tiller                                                                                                                     |      |          |       |           |
| <i>K</i>          | Node                                                                                                                                 |      |          |       |           |
| <i>L</i>          | soil or canopy layer                                                                                                                 |      |          |       |           |
| <i>M</i>          | leaf azimuth                                                                                                                         |      |          |       |           |
| <i>n</i>          | leaf inclination                                                                                                                     |      |          |       |           |
| <i>o</i>          | leaf exposure (sunlit vs. shaded)                                                                                                    |      |          |       |           |
| <i>r</i>          | root or mycorrhizae                                                                                                                  |      |          |       |           |

*Variables*

|                            |                                                                             |                                                  |             |                       |                           |
|----------------------------|-----------------------------------------------------------------------------|--------------------------------------------------|-------------|-----------------------|---------------------------|
| $\beta$                    | stomatal resistance shape parameter                                         | MPa <sup>-1</sup>                                | [B2b,C4,C9] | -5.0                  | Grant and Flanagan (2007) |
| $C_b$                      | [CO <sub>2</sub> ] in canopy air                                            | μmol mol <sup>-1</sup>                           | [B2,C2,C5]  |                       |                           |
| $C'_{i}$                   | [CO <sub>2</sub> ] in canopy leaves at $\psi_{c_i} = 0$ MPa                 | μmol mol <sup>-1</sup>                           | [B2]        | 0.70 $C_b$            | Larcher (2001)            |
| $d_{i,r,l}$                | half distance between adjacent roots                                        | m                                                | [B9]        |                       |                           |
| $E_{ci}$                   | canopy transpiration                                                        | m <sup>3</sup> m <sup>-2</sup> h <sup>-1</sup>   | [B1,B14]    |                       |                           |
| $e_a$                      | atmospheric vapor density at $T_a$ and ambient humidity                     | g m <sup>-3</sup>                                | [B1]        |                       |                           |
| $e_{ci(T_{ci},\psi_{ci})}$ | canopy vapor density at $T_{c_i}$ and $\psi_{c_i}$                          | g m <sup>-3</sup>                                | [B1]        |                       |                           |
| $G_{ci}$                   | canopy storage heat flux                                                    | W m <sup>-2</sup>                                | [B1]        |                       |                           |
| $H_{ci}$                   | canopy sensible heat flux                                                   | W m <sup>-2</sup>                                | [B1]        |                       |                           |
| $K$                        | von Karman's constant                                                       |                                                  | [B3a]       | 0.41                  |                           |
| $\kappa_{ii,r,l}$          | hydraulic conductivity between soil and root surface                        | m <sup>2</sup> MPa <sup>-1</sup> h <sup>-1</sup> | [B9]        |                       |                           |
| $\gamma$                   | scaling factor for bole axial resistance from primary root axial resistance | -                                                | [B11]       | 1.6 x 10 <sup>4</sup> | Grant et al. (2007)       |
| $L$                        | latent heat of evaporation                                                  | J g <sup>-1</sup>                                | [B1]        | 2460                  |                           |
| $LE_{ci}$                  | latent heat flux between canopy and atmosphere                              | W m <sup>-2</sup>                                | [B1]        |                       |                           |

|                     |                                                                                                                     |                            |                      |                                                                      |                       |
|---------------------|---------------------------------------------------------------------------------------------------------------------|----------------------------|----------------------|----------------------------------------------------------------------|-----------------------|
| $L_{i,r,l}$         | length of roots or mycorrhizae                                                                                      | $\text{m m}^{-2}$          | [B9,B10,B12,B13<br>] |                                                                      |                       |
| $M_{i,r,l}$         | mass of roots or mycorrhizae                                                                                        | $\text{g m}^{-2}$          | [B11,B13]            |                                                                      |                       |
| $n_{i,r,l,x}$       | number of primary ( $x = 1$ ) or secondary ( $x = 2$ ) axes                                                         | $\text{m}^{-2}$            | [B11,B12]            |                                                                      |                       |
| $\Omega_{ai,r}$     | axial resistivity to water transport along root or mycorrhizal axes                                                 | $\text{MPa h m}^{-4}$      | [B11,B12]            | $4.0 \times 10^9$<br>deciduous<br>$1.0 \times 10^{10}$<br>coniferous | Larcher (2001)        |
| $\Omega_{ai,r,l,x}$ | axial resistance to water transport along axes of primary ( $x = 1$ ) or secondary ( $x = 2$ ) roots or mycorrhizae | $\text{MPa h m}^{-1}$      | [B6,B11,B12]         |                                                                      |                       |
| $\Omega_{ri,r}$     | radial resistivity to water transport from surface to axis of roots or mycorrhizae                                  | $\text{MPa h m}^{-2}$      | [B10]                | $1.0 \times 10^4$                                                    | Doussan et al. (1998) |
| $\Omega_{ri,r,l}$   | radial resistance to water transport from surface to axis of roots or mycorrhizae                                   | $\text{MPa h m}^{-1}$      | [B6,B10]             |                                                                      |                       |
| $\Omega_{si,r,l}$   | radial resistance to water transport from soil to surface of roots or mycorrhizae                                   | $\text{MPa h m}^{-1}$      | [B6,B9]              |                                                                      |                       |
| $\theta_{wl}$       | soil water content                                                                                                  | $\text{m}^3 \text{m}^{-3}$ | [B9]                 |                                                                      |                       |
| $\theta_{pl}$       | soil porosity                                                                                                       | $\text{m}^3 \text{m}^{-3}$ | [B9]                 |                                                                      |                       |

|                    |                                                                                                     |                            |                  |                                                                                             |                             |
|--------------------|-----------------------------------------------------------------------------------------------------|----------------------------|------------------|---------------------------------------------------------------------------------------------|-----------------------------|
| $\theta_{P_{i,r}}$ | root porosity                                                                                       | $\text{m}^3 \text{m}^{-3}$ | [B13]            |                                                                                             |                             |
| $Ri$               | Richardson number                                                                                   |                            | [B3a,B3b]        |                                                                                             | van Bavel and Hillel (1976) |
| $Rn_{ci}$          | canopy net radiation                                                                                | $\text{W m}^{-2}$          | [B1]             |                                                                                             |                             |
| $r_{ai}$           | aerodynamic resistance to vapor flux from canopy                                                    | $\text{s m}^{-1}$          | [B1,B3a]         |                                                                                             |                             |
| $r_{bi}$           | radius of bole at ambient $\psi_{c_i}$                                                              | m                          | [B11]            |                                                                                             |                             |
| $r_{b'_i}$         | radius of bole at $\psi_{c_i} = 0$ MPa                                                              | m                          | [B11]            |                                                                                             |                             |
| $r_{ci}$           | canopy stomatal resistance to vapor flux                                                            | $\text{s m}^{-1}$          | [B1,B2b]         |                                                                                             |                             |
| $r_{cmax_i}$       | canopy cuticular resistance to vapor flux                                                           | $\text{s m}^{-1}$          | [B2b]            | $5.0 \times 10^3$                                                                           | Larcher (2001)              |
| $r_{cmini}$        | minimum $r_{c_i}$ at $\psi_{c_i} = 0$ MPa                                                           | $\text{s m}^{-1}$          | [B2,B2b]         |                                                                                             |                             |
| $r_{i,r,l,x}$      | radius of primary ( $x=1$ ) or secondary ( $x=2$ ) roots or mycorrhizae at ambient $\psi_{r_i l,z}$ | m                          | [B9,B11,B12,B13] |                                                                                             |                             |
| $r'_{i,r}$         | radius of secondary roots or mycorrhizae at $\psi_{r_i l,z} = 0$ MPa                                | m                          | [B11,B12]        | $2.0 \times 10^{-4}$ tree<br>$1.0 \times 10^{-4}$ bush<br>$0.05 \times 10^{-4}$ mycorrhizae |                             |
| $\rho_r$           | root specific density                                                                               | $\text{g C g FW}^{-1}$     | [B13]            | 0.05                                                                                        | Grant (1998a)               |

|                |                                                                       |                         |             |                      |                |
|----------------|-----------------------------------------------------------------------|-------------------------|-------------|----------------------|----------------|
| $T_a$          | air temperature                                                       | K                       | [B3b]       |                      |                |
| $T_c$          | canopy temperature                                                    | K                       | [B3b]       |                      |                |
| $U_{wi}$       | total water uptake from all rooted soil layers                        | $m^3 m^{-2} h^{-1}$     | [B5,B14]    |                      |                |
| $U_{wi,r,l}$   | water uptake by root and mycorrhizal surfaces in each soil layer      | $m^3 m^{-2} h^{-1}$     | [B5,B6]     |                      |                |
| $u_a$          | wind speed measured at $z_u$                                          | $m s^{-1}$              | [B3a,B3b]   |                      |                |
| $V_c' i$       | potential canopy CO <sub>2</sub> fixation rate at $\psi_{ci} = 0$ MPa | $\mu mol m^{-2} s^{-1}$ | [B2]        |                      |                |
| $v_r$          | root specific volume                                                  | $m^3 g FW^{-1}$         | [B13]       | $10^{-6}$            | Grant (1998a)  |
| $X_{ci}$       | canopy capacitance                                                    | $m^3 m^{-2} MPa^{-1}$   | [B14]       |                      |                |
| $\psi_{ci}$    | canopy water potential                                                | MPa                     | [B4,B7,B14] |                      |                |
| $\psi_{c'i}$   | $\psi_{ci} +$ canopy gravitational potential                          | MPa                     | [B6,B7]     |                      |                |
| $\psi_{\pi i}$ | canopy osmotic potential                                              | MPa                     | [B4]        |                      |                |
| $\psi_{sl}$    | soil water potential                                                  | MPa                     | [B8]        |                      |                |
| $\psi_{s'l}$   | $\psi_{sl} +$ soil gravitational potential                            | MPa                     | [B6,B8]     |                      |                |
| $\psi_i$       | canopy turgor potential                                               | MPa                     | [B2b,B4]    | 1.25 at $\psi_c = 0$ |                |
| $z_{bi}$       | length of bole from soil surface to top of canopy                     | m                       | [B7,B11]    |                      |                |
| $z_{di}$       | canopy zero-plane displacement height                                 | m                       | [B3a]       |                      | Perrier (1982) |
| $z_l$          | depth of soil layer below surface                                     | m                       | [B8,B11]    |                      |                |



|       |                                  |   |           |                |
|-------|----------------------------------|---|-----------|----------------|
| $z_r$ | canopy surface roughness         | m | [B3a,B3b] | Perrier (1982) |
| $z_u$ | height of wind speed measurement | m | [B3a,B3b] |                |

## Appendix C: Gross primary productivity and autotrophic respiration

### C<sub>3</sub> gross primary productivity

$$GPP = \sum_{i,j,k,l,m,n,o} (V_{ci,j,k,l,m,n,o} - V_{gi,j,k,l,m,n,o}) A_{i,j,k,l,m,n,o} \quad \text{solve for } C_{ii,j,k,l,m,n,o} \text{ at which} \quad [C1]$$

$$V_{gi,j,k,l,m,n,o} = (C_b - C_{ii,j,k,l,m,n,o}) / r_{i,j,k,l,m,n,o} \quad \text{diffusion} \quad [C2]$$

$$V_{ci,j,k,l,m,n,o} = \min\{V_{bi,j,k,l,m,n,o}, V_{ji,j,k,l,m,n,o}\} \quad \text{carboxylation} \quad [C3]$$

$$r_{i,j,k,l,m,n,o} = r_{1\text{mini},j,k,l,m,n,o} + (r_{1\text{maxi}} - r_{1\text{mini},j,k,l,m,n,o}) e^{(-\beta\psi_i)} \quad r_1 \text{ is leaf-level equivalent of } r_c \quad [C4]$$

$$r_{1\text{mini},j,k,l,m,n,o} = (C_b - C_i') / V_{c' i,j,k,l,m,n,o} \quad \text{minimum } r_1 \text{ is driven by} \quad [C5]$$

carboxylation

$$V_{bi,j,k,l,m,n,o} = V_{bmaxi,j,k} (C_{ci,j,k,l,m,n,o} - \Gamma_{i,j,k}) / (C_{ci,j,k,l,m,n,o} + K_{ci}) f_{\psi i,j,k,l,m,n,o} f_{iCi} \quad [C6a]$$

CO<sub>2</sub>, water, temperature and  
nutrient constraints on V<sub>b</sub>

$$V_{bmaxi,j,k} = V_b' F_{rubisco_i} M_{i,j,k,prot} / A_{i,j,k} f_{bi} \quad [C6b]$$

$$\Gamma_{i,j,k} = 0.5 O_c V_{omaxi,j,k} K_{ci} / (V_{bmaxi,j,k} K_{oi}) \quad [C6c]$$

$$V_{omaxi,j,k} = V_o' F_{rubisco_i} M_{i,j,k,prot} / A_{i,j,k} f_{voi} \quad [C6d]$$

$$K_{ci} = K_{ci} f_{tkci} (1 + O_c / (K_{oi} f_{tkoi})) \quad [C6e]$$

$$V_{ji,j,k,l,m,n,o} = J_{ij,k,l,m,n,o} Y_{ij,k,l,m,n,o} f_{\psi i,j,k,l,m,n,o} f_{iCi} \quad [C7]$$

$$J_{ij,k,l,m,n,o} = (\epsilon I_{i,l,m,n,o} + J_{maxi,j,k} - ((\epsilon I_{i,l,m,n,o} + J_{maxi,j,k})^2 - 4\alpha\epsilon I_{i,l,m,n,o} J_{maxi,j,k})^{0.5}) / (2\alpha) \quad [C8a]$$

water, temperature and nutrient  
constraints on V<sub>j</sub>

$$J_{maxi,j,k} = V_j' F_{chlorophyll_i} M_{i,j,k,prot} / A_{i,j,k} f_{ji} \quad [C8b]$$

$$f_{\psi i,j,k,l,m,n,o} = (r_{iminij,k,l,m,n,o} / r_{ij,k,l,m,n,o})^{0.5} \quad [C9]$$

non-stomatal effect related to  
stomatal effect

$$f_{\text{bi}} = \exp[\mathbf{B}_v - \mathbf{H}_{\text{av}}/(RT_{ci})] / \{1 + \exp[(\mathbf{H}_{\text{dl}} - ST_{ci})/(RT_{ci})] + \exp[(ST_{ci} - \mathbf{H}_{\text{dh}})/(RT_{ci})]\}$$

Arrhenius functions for [C10a]

$$f_{\text{oi}} = \exp[\mathbf{B}_o - \mathbf{H}_{\text{ao}}/(RT_{ci})] / \{1 + \exp[(\mathbf{H}_{\text{dl}} - ST_{ci})/(RT_{ci})] + \exp[(ST_{ci} - \mathbf{H}_{\text{dh}})/(RT_{ci})]\}$$

carboxylation, oxygenation and

electron transport [C10b]

$$f_{\text{ji}} = \exp[\mathbf{B}_j - \mathbf{H}_{\text{aj}}/(RT_{ci})] / \{1 + \exp[(\mathbf{H}_{\text{dl}} - ST_{ci})/(RT_{ci})] + \exp[(ST_{ci} - \mathbf{H}_{\text{dh}})/(RT_{ci})]\}$$

temperature sensitivity of  $\mathbf{K}_{c_i}$ ,  $\mathbf{K}_{o_i}$

[C10c]

$$f_{\text{tkci}} = \exp[\mathbf{B}_{\text{kc}} - \mathbf{H}_{\text{akc}}/(RT_{ci})]$$

[C10d]

$$f_{\text{tkoi}} = \exp[\mathbf{B}_{\text{ko}} - \mathbf{H}_{\text{ako}}/(RT_{ci})]$$

[C10e]

$$f_{\text{Ci}} = \min\{\sigma_{\text{Ni}_j}/(\sigma_{\text{Ni}_j} + \sigma_{\text{Ci}_j}/\mathbf{K}_{\text{icN}}), \sigma_{\text{Pi}_j}/(\sigma_{\text{Pi}_j} + \sigma_{\text{Ci}_j}/\mathbf{K}_{\text{icP}})\}$$

product inhibition of  $V_b$ ,  $V_j$  from [C11]

$\sigma_{\text{N}}$  and  $\sigma_{\text{P}}$  vs.  $\sigma_{\text{C}}$  in shoots

$$\delta M_{\text{L}_{\text{Ri},j,k}} / \delta t = \delta M_{\text{L}_{\text{i},j,k}} / \delta t \min\{[N'_{\text{leaf}} + (N_{\text{leaf}} - N'_{\text{leaf}})f_{\text{Ci}}]/N_{\text{prot}}, [P'_{\text{leaf}} + (P_{\text{leaf}} - P'_{\text{leaf}})f_{\text{Ci}}]/P_{\text{prot}}\}$$

leaf structural protein growth [C12]

## Autotrophic respiration

$$R_a = \sum_i \sum_j (R_{\text{Ci}_j} + R_{\text{Si}_j}) + \sum_i \sum_j \sum_z (R_{\text{Ci},r,l} + R_{\text{Si},r,l}) + E_{\text{N,P}} (U_{\text{NH4i},r,l} + U_{\text{NO3i},r,l} + U_{\text{PO4i},r,l})$$

total autotrophic respiration [C13]

$$R_{ci,j} = R_c' \sigma_{Cij} f_{tai}$$

O<sub>2</sub> constraint on root respiration [C14a]

$$R_{ci,r,l} = R_c' \sigma_{C i,r,l} f_{tai,l} (U_{O2i,r,l} / U'_{O2i,r,l})$$

from active uptake coupled with  
diffusion of O<sub>2</sub> from soil as for [C14b]

$$U_{O2i,r,l} = U'_{O2 i,r,l} [O_{2ri,r,l}] / ([O_{2ri,r,l}] + K_{O2})$$

heterotrophic respiration in [A17],  
and from active uptake coupled [C14c]

$$\begin{aligned} &= U_{w_{i,r,l}} [O_{2sl}] + 2\pi L_{i,r,l} D_{sO2} ([O_{2sl}] - [O_{2ri,r,l}]) \ln\{(r_{sl} + r_{ri,r,l}) / r_{ri,r,l}\} \\ &\quad + 2\pi L_{i,r,l} D_{rO2} ([O_{2qi,r,l}] - [O_{2ri,r,l}]) \ln(r_{qi,r,l} / r_{ri,r,l}) \end{aligned}$$

with diffusion of O<sub>2</sub> from roots [C14d]

$$U'_{O2 i,r,l} = 2.67 R_a'_{i,r,l}$$

[C14e]

$$R_{si,j} = - \min\{0.0, R_{ci,j} - R_{mi,j}\}$$

remobilization when  $R_m > R_c$  [C15]

$$R_{mi,j} = \sum_z (N_{i,j,z} R_m' f_{umi})$$

maintenance respiration [C16]

$$R_{gi,j} = \max\{0.0, \min\{(R_{ci,j} - R_{mi,j}) \min\{1.0, \max\{0.0, \psi_i - \psi_i'\}\}\}$$

growth when  $R_m < R_c$  [C17]

### Growth and senescence

$$l_{i,j,z,C} = R_{si,j} M_{L_N i,j} / M_{L_R i,j}$$

senescence drives litterfall of non-  
remobilizable material [C18]

$$l_{i,j,z,N} = l_{i,j,z,C} \mathbf{N}_{\text{prot}} (1.0 - \mathbf{X}_{\text{mx}} f_{xN_{i,j}})$$

litterfall of N and P is driven by [C19a]

$$l_{i,j,z,P} = l_{i,j,z,C} \mathbf{P}_{\text{prot}} (1.0 - \mathbf{X}_{\text{mx}} f_{xP_{i,j}})$$

that of C but reduced by

translocation to  $\sigma_N$  and  $\sigma_P$  [C19b]

$$f_{xN_{i,j}} = \sigma_{C_{i,j}} / (\sigma_{C_{i,j}} + \sigma_{N_{i,j}} / \mathbf{K}_{xN})$$

according to ratios of  $\sigma_N$  and  $\sigma_P$

with  $\sigma_C$  [C19c]

$$f_{xP_{i,j}} = \sigma_{C_{i,j}} / (\sigma_{C_{i,j}} + \sigma_{P_{i,j}} / \mathbf{K}_{xP})$$

[C19d]

$$\delta M_{B_{i,j}} / \delta t = \sum_z [R_{g_{i,j}} (1 - \mathbf{Y}_{g_{i,z}}) / \mathbf{Y}_{g_{i,z}}] - R_{s_{i,j}} - l_{i,j,C}$$

branch growth driven by  $R_g$  [C20a]

$$\delta M_{R_{i,r,l}} / \delta t = [R_{g_{i,r,l}} (1 - \mathbf{Y}_{g_{i,r}}) / \mathbf{Y}_{g_{i,r}}] - R_{s_{i,r,l}} - l_{i,r,l,C}$$

root growth driven by  $R_g$  [C20b]

$$\delta A_{L_{i,j,k,l}} / \delta t = \chi (M_{L_{i,j,k,l}} / y_i)^{-0.33} \delta M_{L_{i,j,k,l}} / \delta t \min\{1, \max\{0, \psi_i - \psi_i'\}\}$$

leaf expansion driven by leaf mass [C21a]

growth

$$\delta L_{i,r,l,1} / \delta t = (\delta M_{R_{i,r,l,1}} / \delta t) / y_i \nu_r / \{\rho_r (1 - \theta_{P_{i,r}}) (\pi r_{i,r,l,1}^2)\}$$

root extension of primary and [C21b]

secondary axes driven by root

$$\delta L_{i,r,l,2} / \delta t = (\delta M_{R_{i,r,l,2}} / \delta t) \nu_r / \{\rho_r (1 - \theta_{P_{i,r}}) (\pi r_{i,r,l,2}^2)\}$$

mass growth [C21c]

$$f_{tai} = T_{ci} \{ \exp[B_v - H_{av}/(RT_{ci})] \} / \{ 1 + \exp[(H_{di} - ST_{ci})/(RT_{ci})] + \exp[(ST_{ci} - H_{dh})/(RT_{ci})] \}$$

Arrhenius function for  $R_a$  [C22a]

$$f_{tmi} = e^{(0.0811*(T_{ci} - 298.15))}$$

temperature function for  $R_m$  [C22b]

## Root and mycorrhizal nutrient uptake

$$U_{NH4i,r,l} = \{ U_{wi,r,l} [NH_4^+] + 2\pi L_{i,r,l} D_{eNH4l} ([NH_4^+] - [NH_4^+]_{i,r,l}) / \ln(d_{i,r,l}/r_{ri,r,l}) \}$$

root N and P uptake from mass [C23a]

$$= U'_{NH4} (U_{O2i,r,l} / U'_{O2i,r,l}) A_{i,r,l} ([NH_4^+]_{i,r,l} - [NH_4^+]_{mn}) / ([NH_4^+]_{i,r,l} - [NH_4^+]_{mn} + K_{NH4}) f_{i,l} f_{iNi,r,l}$$

flow + diffusion coupled with [C23b]

$$U_{NO3i,r,l} = \{ U_{wi,r,l} [NO_3^-] + 2\pi L_{i,r,l} D_{eNO3l} ([NO_3^-] - [NO_3^-]_{i,r,l}) / \ln(d_{i,r,l}/r_{ri,r,l}) \}$$

active uptake of  $NH_4^+$ ,  $NO_3^-$  and

$$= U'_{NO3} (U_{O2i,r,l} / U'_{O2i,r,l}) A_{i,r,l} ([NO_3^-]_{i,r,l} - [NO_3^-]_{mn}) / ([NO_3^-]_{i,r,l} - [NO_3^-]_{mn} + K_{NO3}) f_{i,l} f_{iNi,r,l}$$

$H_2PO_4^-$  constrained by  $O_2$  uptake, [C23c]

$$U_{PO4i,r,l} = \{ U_{wi,r,l} [H_2PO_4^-] + 2\pi L_{i,r,l} D_{ePO4l} ([H_2PO_4^-] - [H_2PO_4^-]_{i,r,l}) / \ln(d_{i,r,l}/r_{ri,r,l}) \}$$

as for microbial N and P uptake in [C23d]

$$= U'_{PO4} (U_{O2i,r,l} / U'_{O2i,r,l}) A_{i,r,l} ([H_2PO_4^-]_{i,r,l} - [H_2PO_4^-]_{mn}) / ([H_2PO_4^-]_{i,r,l} - [H_2PO_4^-]_{mn} + K_{PO4}) f_{i,l} f_{iPi,r,l}$$

[A26]

[C23e]

$$f_{iNi,r,l} = \sigma_{Ci,r,l} / (\sigma_{Ci,r,l} + \sigma_{Ni,r,l} / K_{iNC})$$

product inhibition of  $U_{NH4}$ ,  $U_{NO3}$  [C23f]

$$f_{iPi,r,l} = \sigma_{Ci,r,l} / (\sigma_{Ci,r,l} + \sigma_{Pi,r,l} / K_{iPC})$$

and  $U_{PO4}$  determined by  $\sigma_N$  and  $\sigma_P$  [C23g]

vs.  $\sigma_C$  in roots [C23h]

## C<sub>4</sub> gross primary productivity

### C<sub>4</sub> mesophyll

$$GPP = \sum_{i,j,k,l,m,n,o} (V_{g(m4)i,j,k,l,m,n,o} = V_{c(m4)i,j,k,l,m,n,o}) \quad [C24]$$

$$V_{g(m4)i,j,k,l,m,n,o} = (C_b - C_{i(m4)i,j,k,l,m,n,o}) / r_{fi,j,k,l,m,n,o} \quad \text{gaseous diffusion} \quad [C25]$$

$$V_{c(m4)i,j,k,l,m,n,o} = \min\{V_{b(m4)i,j,k,l,m,n,o}, V_{j(m4)i,j,k,l,m,n,o}\} \quad \text{mesophyll carboxylation} \quad [C26]$$

$$r_{fi,j,k,l,m,n,o} = r_{lfmini,j,k,l,m,n,o} + (r_{lfmaxi} - r_{lfmini,j,k,l,m,n,o}) e^{(-\beta \psi_i)} \quad [C27]$$

$$r_{lfmini,j,k,l,m,n,o} = (C_b - C_{i(m4)i}) / V_{c0(m4)i,j,k,l,m,n,o} \quad [C28]$$

$$V_{b(m4)i,j,k,l,m,n,o} = V_{bmax(m4)i,j,k} (C_{c(m4)i,j,k,l,m,n,o} - \Gamma_{(m4)i,j,k}) / (C_{c(m4)i,j,k,l,m,n,o} + K_{c(m4)i}) \quad \text{CO}_2\text{-limited carboxylation} \quad [C29]$$

$$V_{j(m4)i,j,k,l,m,n,o} = J_{(m4)i,j,k,l,m,n,o} Y_{(m4)i,j,k,l,m,n,o} \quad \text{light-limited carboxylation} \quad [C30]$$

$$J_{(m4)i,j,k,l,m,n,o} = (\mathcal{E} I_{i,l,m,n,o} + J_{max(m4)i,j,k} - ((\mathcal{E} I_{i,l,m,n,o} + J_{max(m4)i,j,k})^2 - 4\alpha\mathcal{E} I_{i,l,m,n,o} J_{max(m4)i,j,k})^{0.5}) / (2\alpha) \quad \text{irradiance response function} \quad [C31]$$

$$V_{bmax(m4)i,j,k} = V_{bmax(m4)i} [N_{pep(m4)i,j,k}]' N_{fi,j,k} A_{fi,j,k} f_{C(m4)i,j,k} f_{\psi_i} f_{tvi} \quad \text{PEPc activity} \quad [C32]$$

$$J_{max(m4)i,j,k} = J_{max} [N_{chl(m4)i,j,k}]' N_{fi,j,k} A_{fi,j,k} f_{C(m4)i,j,k} f_{\psi_i} f_{tvi} \quad \text{chlorophyll activity} \quad [C33]$$

$$f_{C(m4)i,j,k} = 1.0 / (1.0 + [\chi_{C4(m4)i,j,k}] / K_{\chi_{C4(m4)}}) \quad \text{C}_4 \text{ product inhibition} \quad [C34]$$

$$f_{\psi_i,j,k,l,m,n,o} = (r_{lfmini,j,k,l,m,n,o} / r_{fi,j,k,l,m,n,o})^{0.5} \quad \text{non-stomatal water limitation} \quad [C35]$$

$$f_{tvi} = T_{ci} \{ \exp[B - H_a / (RT_{ci})] \} / \{ 1 + \exp[(H_{d1} - ST_{ci}) / (RT_{ci})] + \exp[(ST_{ci} - H_{dh}) / (RT_{ci})] \} \quad \text{temperature limitation} \quad [C36]$$

### C<sub>4</sub> mesophyll-bundle sheath exchange

$$V_{\chi_{C4(m4)i,j,k}} = \kappa_{\chi_{C4(m4)}} (\chi_{C4(m4)i,j,k} W_{lf(b4)i,j,k} - \chi_{C4(b4)i,j,k} W_{lf(m4)i,j,k}) / (W_{lf(b4)i,j,k} + W_{lf(m4)i,j,k}) \quad \text{mesophyll-bundle sheath transfer} \quad [C37]$$

$$V_{\chi_{C4(b4)i,j,k}} = \kappa_{\chi_{C4(b4)}} \chi_{C4(b4)i,j,k} / (1.0 + C_{c(b4)i,j,k} / K_{\chi_{C4(b4)}}) \quad \text{bundle sheath decarboxylation} \quad [C38]$$

$$V_{\phi(b4)i,j,k} = \kappa_{C_c(b4)} (C_{c(b4)i,j,k} - C_{c(m4)i,j,k}) (12 \times 10^{-9}) W_{lf(b4)i,j,k} \quad \text{bundle sheath-mesophyll leakage} \quad [C39]$$

$$\delta\chi_{C4(m4)ij,k} / \delta t = \sum_{l,m,n,o} V_{c(m4)ij,k,l,m,n,o} - V_{\chi C4(m4)ij,k} \quad \text{mesophyll carboxylation products} \quad [C40]$$

$$\delta\chi_{C4(b4)ij,k} / \delta t = V_{\chi C4(m4)ij,k} - V_{\chi C4(b4)ij,k} \quad \text{bundle sheath carboxylation products} \quad [C41]$$

$$\delta C_{c(b4)ij,k} / \delta t = V_{\chi C4(b4)ij,k} - V_{\phi(b4)ij,k} - \sum_{l,m,n,o} V_{c(b4)ij,k,l,m,n,o} \quad \text{bundle sheath CO}_2 \text{ concentration} \quad [C42]$$

### C<sub>4</sub> bundle sheath

$$V_{c(b4)ij,k,l,m,n,o} = \min\{V_{b(b4)ij,k}, V_{j(b4)ij,k,l,m,n,o}\} \quad \text{bundle sheath carboxylation} \quad [C43]$$

$$V_{b(b4)ij,k} = V_{b\max(b4)ij,k} (C_{c(b4)ij,k} - \Gamma_{(b4)ij,k}) / (C_{c(b4)ij,k} + K_{c(b4)ij,k}) \quad \text{CO}_2\text{-limited carboxylation} \quad [C44]$$

$$V_{j(b4)ij,k,l,m,n,o} = J_{(b4)ij,k,l,m,n,o} Y_{(b4)ij,k} \quad \text{light- limited carboxylation} \quad [C45]$$

$$J_{(b4)ij,k,l,m,n,o} = (\epsilon I_{i,l,m,n,o} + J_{\max(b4)ij,k} - ((\epsilon I_{i,l,m,n,o} + J_{\max(b4)ij,k})^2 - 4\alpha\epsilon I_{i,l,m,n,o} J_{\max(b4)ij,k})^{0.5}) / (2\alpha) \quad \text{irradiance response function} \quad [C46]$$

$$V_{b\max(b4)ij,k} = V_{b\max(b4)}' [N_{rub(b4)ij,k}]' N_{lfi,j,k} A_{lfi,j,k} f_{C(c3)ij,k} f_{\psi i} f_{\tau vi} \quad \text{RuBPC activity} \quad [C47]$$

$$J_{\max(b4)ij,k} = J_{\max}' [N_{chl(b4)ij,k}]' N_{lfi,j,k} A_{lfi,j,k} f_{C(c3)ij,k} f_{\psi i} f_{\tau vi} \quad \text{chlorophyll activity} \quad [C48]$$

$$f_{C(c3)ij,k} = \min\{[V_{lfi,j}]/([V_{lfi,j}] + [\chi_{c3(b4)ij}]/K_{\tau_{lfi}}), [\pi_{lfi,j}]/([\pi_{lfi,j}] + [\chi_{c3(b4)ij}]/K_{\tau_{\pi}})\} \quad \text{C}_3 \text{ product inhibition} \quad [C49]$$

### Definition of variables in appendix C

| Variable | Definition | Unit | Equation | Value | Reference |
|----------|------------|------|----------|-------|-----------|
|----------|------------|------|----------|-------|-----------|

*Subscripts*



*i* species or functional type: evergreen,  
 coniferous, deciduous, annual, perennial,  
 C<sub>3</sub>, C<sub>4</sub>, monocot, dicot, legume etc.  
*j* branch or tiller  
*k* Node  
*l* soil or canopy layer  
*m* leaf azimuth  
*n* leaf inclination  
*o* leaf exposure (sunlit vs. shaded)  
*z* organ including leaf, stem, root,  
 mycorrhizae

*Variables*

|                 |                                                                                                                |                            |                                              |      |                              |
|-----------------|----------------------------------------------------------------------------------------------------------------|----------------------------|----------------------------------------------|------|------------------------------|
| <i>A</i>        | leaf, root or mycorrhizal surface area                                                                         | $\text{m}^2 \text{m}^{-2}$ | [C1,C6b,C6d,C8b,<br>C21,C23,C32,C33<br>,C47] |      |                              |
| <b><i>β</i></b> | shape parameter for stomatal effects on CO <sub>2</sub> diffusion and<br>non-stomatal effects on carboxylation | $\text{MPa}^{-1}$          | [C4 C27,C35,]                                | -5.0 | Grant and<br>Flanagan (2007) |

|               |                                                                                        |                          |                   |              |                |
|---------------|----------------------------------------------------------------------------------------|--------------------------|-------------------|--------------|----------------|
| $B$           | parameter such that $f_i = 1.0$ at $T_c = 298.15$ K                                    |                          | [C36]             | 17.533       |                |
| $B_j$         | parameter such that $f_{ij} = 1.0$ at $T_c = 298.15$ K                                 |                          | [C10c]            | 17.363       |                |
| $B_{kc}$      | parameter such that $f_{tkci} = 1.0$ at $T_c = 298.15$ K                               |                          | [C10d]            | 22.187       |                |
| $B_{ko}$      | parameter such that $f_{tkoi} = 1.0$ at $T_c = 298.15$ K                               |                          | [C10e]            | 8.067        |                |
| $B_o$         | parameter such that $f_{toi} = 1.0$ at $T_c = 298.15$ K                                |                          | [C10b]            | 24.221       |                |
| $B_v$         | parameter such that $f_{vvi} = 1.0$ at $T_c = 298.15$ K                                |                          | [C10a, C22]       | 26.238       |                |
| $C_b$         | [CO <sub>2</sub> ] in canopy air                                                       | $\mu\text{mol mol}^{-1}$ | [C2,C5 C25,C28]   |              |                |
| $C_{c(b4)}$   | [CO <sub>2</sub> ] in C <sub>4</sub> bundle sheath                                     | $\mu\text{M}$            | [C38,C39,C42,C44] |              |                |
| $C_{c(m4)}$   | [CO <sub>2</sub> ] in C <sub>4</sub> mesophyll in equilibrium with $C_{i,j,k,l,m,n,o}$ | $\mu\text{M}$            | [C29,C39]         |              |                |
| $C_c$         | [CO <sub>2</sub> ] in canopy chloroplasts in equilibrium with $C_{i,j,k,l,m,n,o}$      | $\mu\text{M}$            | [C6]              |              |                |
| $C_{i(m4)'}'$ | [CO <sub>2</sub> ] in C <sub>4</sub> mesophyll air when $\psi_{ci} = 0$                | $\mu\text{mol mol}^{-1}$ | [C28]             | 0.45 x $C_b$ |                |
| $C_{i(m4)}$   | [CO <sub>2</sub> ] in C <sub>4</sub> mesophyll air                                     | $\mu\text{mol mol}^{-1}$ | [C25]             |              |                |
| $C_{i,j,z=l}$ | C content of leaf ( $z = l$ )                                                          | $\text{g C m}^{-2}$      | [C18]             |              |                |
| $C_i'$        | [CO <sub>2</sub> ] in canopy leaves when $\psi_{ci} = 0$                               | $\mu\text{mol mol}^{-1}$ | [C5]              | 0.70 x $C_b$ | Larcher (2001) |
| $C_i$         | [CO <sub>2</sub> ] in canopy leaves                                                    | $\mu\text{mol mol}^{-1}$ | [C2]              |              |                |

|                     |                                                                                                                        |                                          |                  |                                 |               |
|---------------------|------------------------------------------------------------------------------------------------------------------------|------------------------------------------|------------------|---------------------------------|---------------|
| $D_{e\text{NH}_4l}$ | effective dispersivity-diffusivity of $\text{NH}_4^+$ during root uptake                                               | $\text{m}^2 \text{h}^{-1}$               | [C23]            |                                 |               |
| $D_{e\text{NO}_3l}$ | effective dispersivity-diffusivity of $\text{NO}_3^-$ during root uptake                                               | $\text{m}^2 \text{h}^{-1}$               | [C23]            |                                 |               |
| $D_{e\text{PO}_4l}$ | effective dispersivity-diffusivity of $\text{H}_2\text{PO}_4^-$ during root uptake                                     | $\text{m}^2 \text{h}^{-1}$               | [C23]            |                                 |               |
| $D_{r\text{O}_2}$   | aqueous diffusivity of $\text{O}_2$ from root aerenchyma to root or mycorrhizal surfaces                               | $\text{m}^2 \text{h}^{-1}$               | [C14d]           |                                 |               |
| $D_{s\text{O}_2}$   | aqueous diffusivity of $\text{O}_2$ from soil to root or mycorrhizal surfaces                                          | $\text{m}^2 \text{h}^{-1}$               | [C14d]           |                                 |               |
| $d_{i,r,l}$         | half distance between adjacent roots assumed equal to uptake path length                                               | m                                        | [C23]            | $(\pi L_{s,z}/\Delta z)^{-1/2}$ | Grant (1998a) |
| $E_{\text{N,P}}$    | energy cost of nutrient uptake                                                                                         | g C g $\text{N}^{-1}$ or $\text{P}^{-1}$ | [C13]            | 2.15                            | Veen (1981)   |
| $f_{\text{C}(c3)}$  | $\text{C}_3$ product inhibition of RuBP carboxylation activity in $\text{C}_4$ bundle sheath or $\text{C}_3$ mesophyll | –                                        | [C47,C48,C49]    |                                 |               |
| $f_{\text{C}(m4)}$  | $\text{C}_4$ product inhibition of PEP carboxylation activity in $\text{C}_4$ mesophyll                                | –                                        | [C32,C33,C34]    |                                 |               |
| $F_{\text{chl}}$    | fraction of leaf protein in chlorophyll                                                                                | -                                        | [C8b]            | 0.025                           |               |
| $f_{\text{c}}$      | N,P inhibition on carboxylation, leaf structural N,P growth                                                            | –                                        | [C6a,C7,C11,C12] |                                 |               |

|                      |                                                                    |               |                           |                                  |
|----------------------|--------------------------------------------------------------------|---------------|---------------------------|----------------------------------|
| $f_{iN}$             | N inhibition on root N uptake                                      | –             | [C23g]                    |                                  |
| $f_{iP}$             | P inhibition on root P uptake                                      | –             | [C23h]                    |                                  |
| $F_{\text{rubisco}}$ | fraction of leaf protein in rubisco                                | -             | [C6b,d]                   | 0.125                            |
| $f_{ia}$             | temperature effect on $R_{ai,j}$                                   | –             | [C14, C22]                |                                  |
| $f_{ib}$             | temperature effect on carboxylation                                | –             | [C6b,C10a]                |                                  |
| $f_{ig}$             | temperature function for root or mycorrhizal growth<br>respiration | dimensionless | [C23]                     |                                  |
| $f_{ij}$             | temperature effect on electron transport                           |               | [C8b,C10c]                |                                  |
| $f_{tkc}$            | temperature effect on $K_{c_i}$                                    |               | [C6e,C10d]                | Bernacchi et al.<br>(2001, 2003) |
| $f_{tko}$            | temperature effect on $K_{o_i}$                                    |               | [C6e,C10e]                | Bernacchi et al.<br>(2001, 2003) |
| $f_{tm}$             | temperature effect on $R_{mi,j}$                                   | –             | [C16, C22b]               | $Q_{10} = 2.25$                  |
| $f_{to}$             | temperature effect on oxygenation                                  |               | [C6d,C10b]                |                                  |
| $f_{tv}$             | temperature effect on carboxylation                                | –             | [C32,C33,C36,C4<br>7,C48] |                                  |

|              |                                                                           |                     |                          |                        |                                  |
|--------------|---------------------------------------------------------------------------|---------------------|--------------------------|------------------------|----------------------------------|
| $f_{xN}$     | fraction of $X_{mx}$ N translocated out of leaf or root during senescence | –                   | [C19a,c]                 |                        |                                  |
| $f_{xP}$     | fraction of $X_{mx}$ P translocated out of leaf or root during senescence | –                   | [C19b,d]                 |                        |                                  |
| $f_{\psi_i}$ | non-stomatal water effect on carboxylation                                | –                   | [C6a,C7,C9]              |                        | Medrano et al.<br>(2002)         |
| $f_{\psi_i}$ | non-stomatal water effect on carboxylation                                | –                   | [C32,C33,C35C47,<br>C48] |                        |                                  |
| $H_a$        | energy of activation                                                      | J mol <sup>-1</sup> | [C36]                    | 57.5 x 10 <sup>3</sup> |                                  |
| $H_{aj}$     | energy of activation for electron transport                               | J mol <sup>-1</sup> | [C10c]                   | 43 x 10 <sup>3</sup>   | Bernacchi et al.<br>(2001, 2003) |
| $H_{akc}$    | parameter for temperature sensitivity of $K_{c_i}$                        | J mol <sup>-1</sup> | [C10d]                   | 55 x 10 <sup>3</sup>   | Bernacchi et al.<br>(2001, 2003) |
| $H_{ako}$    | parameter for temperature sensitivity of $K_{o_i}$                        | J mol <sup>-1</sup> | [C10e]                   | 20 x 10 <sup>3</sup>   | Bernacchi et al.<br>(2001, 2003) |
| $H_{ao}$     | energy of activation for oxygenation                                      | J mol <sup>-1</sup> | [C10b, C22]              | 60 x 10 <sup>3</sup>   | Bernacchi et al.<br>(2001, 2003) |

|               |                                                                                                                             |                         |             |                     |                                  |
|---------------|-----------------------------------------------------------------------------------------------------------------------------|-------------------------|-------------|---------------------|----------------------------------|
| $H_{av}$      | energy of activation for carboxylation                                                                                      | $J mol^{-1}$            | [C10a, C22] | $65 \times 10^3$    | Bernacchi et al.<br>(2001, 2003) |
| $H_{dh}$      | energy of high temperature deactivation                                                                                     | $J mol^{-1}$            | [C10, C22]  | $222.5 \times 10^3$ |                                  |
| $H_{dh}$      | energy of high temperature deactivation                                                                                     | $J mol^{-1}$            | [C36]       | $220 \times 10^3$   |                                  |
| $H_{dl}$      | energy of low temperature deactivation                                                                                      | $J mol^{-1}$            | [C10, C22]  | $198.0 \times 10^3$ |                                  |
| $H_{dl}$      | energy of low temperature deactivation                                                                                      | $J mol^{-1}$            | [C36]       | $190 \times 10^3$   |                                  |
| $I$           | Irradiance                                                                                                                  | $\mu mol m^{-2} s^{-1}$ | [C8a,]      |                     |                                  |
| $J_{(b4)}$    | electron transport rate in $C_4$ bundle sheath                                                                              | $\mu mol m^{-2} s^{-1}$ | [C45,C46]   |                     |                                  |
| $J_{(m4)}$    | electron transport rate in $C_4$ mesophyll                                                                                  | $\mu mol m^{-2} s^{-1}$ | [C30,C31]   |                     |                                  |
| $J$           | electron transport rate in $C_3$ mesophyll                                                                                  | $\mu mol m^{-2} s^{-1}$ | [C7,C8a]    |                     |                                  |
| $J_{max}'$    | specific electron transport rate at non-limiting $I$ and $25^\circ C$<br>when $\psi_{ci} = 0$ and nutrients are nonlimiting | $\mu mol g^{-1} s^{-1}$ | [C33,C48]   | 400                 |                                  |
| $J_{max(b4)}$ | electron transport rate in $C_4$ bundle sheath at non-limiting $I$                                                          | $\mu mol m^{-2} s^{-1}$ | [C46,C48]   |                     |                                  |
| $J_{max(m4)}$ | electron transport rate in $C_4$ mesophyll at non-limiting $I$                                                              | $\mu mol m^{-2} s^{-1}$ | [C31,C33]   |                     |                                  |
| $J_{max}$     | electron transport rate at non-limiting $I$ , $\psi_{ci}$ , temperature and<br>N,P                                          | $\mu mol m^{-2} s^{-1}$ | [C8a,C8b]   |                     |                                  |

|               |                                                                                                                   |                       |           |                                      |                        |
|---------------|-------------------------------------------------------------------------------------------------------------------|-----------------------|-----------|--------------------------------------|------------------------|
| $K_{c(b4)}$   | Michaelis-Menten constant for carboxylation in C <sub>4</sub> bundle sheath                                       | μM                    | [C44]     | 30.0 at 25°C and zero O <sub>2</sub> | Lawlor (1993)          |
| $K_{c(m4)}$   | Michaelis-Menten constant for carboxylation in C <sub>4</sub> mesophyll                                           | μM                    | [C29]     | 3.0 at 25°C                          | Lawlor (1993)          |
| $K_c$         | Michaelis-Menten constant for carboxylation at zero O <sub>2</sub>                                                | μM                    | [C6c,C6e] | 12.5 at 25 °C                        | Farquhar et al. (1980) |
| $K_c$         | Michaelis-Menten constant for carboxylation at ambient O <sub>2</sub>                                             | μM                    | [C6e]     |                                      |                        |
| $K_{iC_N}$    | inhibition constant for growth in shoots from $\sigma_C$ vs. $\sigma_N$                                           | g C g N <sup>-1</sup> | [C11]     | 100                                  | Grant (1998a)          |
| $K_{iC_P}$    | inhibition constant for growth in shoots from $\sigma_C$ vs. $\sigma_P$                                           | g C g P <sup>-1</sup> | [C11]     | 1000                                 | Grant (1998a)          |
| $K_{iC4(b4)}$ | constant for CO <sub>2</sub> product inhibition of C <sub>4</sub> decarboxylation in C <sub>4</sub> bundle sheath | μM                    | [C38]     | 1000.0                               |                        |
| $K_{iC4(m4)}$ | constant for C <sub>4</sub> product inhibition of PEP carboxylation activity in C <sub>4</sub> mesophyll          | μM                    | [C34]     | 5 x 10 <sup>6</sup>                  |                        |

|              |                                                                                                                                                                      |                       |        |       |                              |
|--------------|----------------------------------------------------------------------------------------------------------------------------------------------------------------------|-----------------------|--------|-------|------------------------------|
| $K_{IVf}$    | constant for C <sub>3</sub> product inhibition of RuBP carboxylation activity in C <sub>4</sub> bundle sheath or C <sub>3</sub> mesophyll caused by [ $V_{fi,j}$ ]   | g C g N <sup>-1</sup> | [C49]  | 100   |                              |
| $K_{I\pi f}$ | constant for C <sub>3</sub> product inhibition of RuBP carboxylation activity in C <sub>4</sub> bundle sheath or C <sub>3</sub> mesophyll caused by [ $\pi_{fi,j}$ ] | g C g P <sup>-1</sup> | [C49]  | 1000  |                              |
| $K_{iNC}$    | inhibition constant for N uptake in roots from $\sigma_{C_{i,j}}$ vs. $\sigma_{N_j}$                                                                                 | g N g C <sup>-1</sup> | [C23]  | 0.1   | Grant (1998a)                |
| $K_{iPC}$    | inhibition constant for P uptake in roots from $\sigma_{C_{i,j}}$ vs. $\sigma_{P_{i,j}}$ roots                                                                       | g P g C <sup>-1</sup> | [C23]  | 0.01  | Grant (1998a)                |
| $K_{NH_4}$   | M-M constant for NH <sub>4</sub> <sup>+</sup> uptake at root or mycorrhizal surfaces                                                                                 | g N m <sup>-3</sup>   | [C23]  | 0.40  | Barber and Silberbush (1984) |
| $K_{NO_3}$   | M-M constant for NO <sub>3</sub> <sup>-</sup> uptake at root or mycorrhizal surfaces                                                                                 | g N m <sup>-3</sup>   | [C23]  | 0.35  | Barber and Silberbush (1984) |
| $K_{PO_4}$   | M-M constant for H <sub>2</sub> PO <sub>4</sub> <sup>-</sup> uptake root or mycorrhizal surfaces                                                                     | g P m <sup>-3</sup>   | [C23]  | 0.125 | Barber and Silberbush (1984) |
| $K_{O_2}$    | Michaelis-Menten constant for root or mycorrhizal O <sub>2</sub> uptake                                                                                              | g m <sup>-3</sup>     | [C14c] | 0.064 | Griffin (1972)               |



|                    |                                                                            |                                   |                   |              |                           |
|--------------------|----------------------------------------------------------------------------|-----------------------------------|-------------------|--------------|---------------------------|
| $K_o$              | inhibition constant for $O_2$ in carboxylation                             | $\mu\text{M}$                     | [C6c,C6e]         | 500 at 25 °C | Farquhar et al.<br>(1980) |
| $K_{xN}$           | inhibition constant for remobilization of leaf or root N during senescence | $\text{g N g C}^{-1}$             | [C19c]            | 0.1          |                           |
| $K_{xP}$           | inhibition constant for remobilization of leaf or root P during senescence | $\text{g P g C}^{-1}$             | [C19d]            | 0.01         |                           |
| $L$                | root length                                                                | $\text{m m}^{-2}$                 | [C14d,C21b,C23]   |              |                           |
| $l_C$              | C litterfall from leaf or root                                             | $\text{g C m}^{-2} \text{h}^{-1}$ | [C18,C19a,b,C20]  |              |                           |
| $l_{N,P}$          | N or P litterfall from leaf or root                                        | $\text{g C m}^{-2} \text{h}^{-1}$ | [C19a,b]          |              |                           |
| $M_B$              | branch C phytomass                                                         | $\text{g C m}^{-2}$               | [C20]             |              |                           |
| $M_L$              | leaf C phytomass                                                           | $\text{g C m}^{-2}$               | [C12,C21]         |              |                           |
| $M_{L_N}, M_{L_R}$ | non-remobilizable, remobilizable leaf C phytomass                          | $\text{g C m}^{-2}$               | [C12,C18]         |              |                           |
| $M_R$              | root C phytomass                                                           | $\text{g C m}^{-2}$               | [C20,C21]         |              |                           |
| $M_{iprot}$        | leaf protein phytomass calculated from leaf N, P contents                  | $\text{g N m}^{-2}$               | [C6b,C6d,C8b,C12] |              |                           |
| N,P                | N or P content of organ z                                                  | $\text{g N m}^{-2}$               | [C16, C19]        |              |                           |
| $N_{prot}$         | N content of protein remobilized from leaf or root                         | $\text{g N C}^{-1}$               | [C12,C19a]        | 0.4          |                           |

|                                         |                                                                                                                 |                                |                   |                               |                                 |
|-----------------------------------------|-----------------------------------------------------------------------------------------------------------------|--------------------------------|-------------------|-------------------------------|---------------------------------|
| $[\text{NH}_4^+_{i,r,l}]$               | concentration of $\text{NH}_4^+$ at root or mycorrhizal surfaces                                                | $\text{g N m}^{-3}$            | [C23]             |                               |                                 |
| $[\text{NH}_4^+_{\text{mm}}]$           | concentration of $\text{NH}_4^+$ at root or mycorrhizal surfaces below<br>which $U_{\text{NH}_4} = 0$           | $\text{g N m}^{-3}$            | [C23]             | 0.0125                        | Barber and<br>Silberbush (1984) |
| $[\text{NO}_3^-_{i,r,l}]$               | concentration of $\text{NO}_3^-$ at root or mycorrhizal surfaces                                                | $\text{g N m}^{-3}$            | [C23]             |                               |                                 |
| $[\text{NO}_3^-_{\text{mm}}]$           | concentration of $\text{NO}_3^-$ at root or mycorrhizal surfaces below<br>which $U_{\text{NO}_3} = 0$           | $\text{g N m}^{-3}$            | [C23]             | 0.03                          | Barber and<br>Silberbush (1984) |
| $[\text{H}_2\text{PO}_4^-_{i,r,l}]$     | concentration of $\text{H}_2\text{PO}_4^-$ root or mycorrhizal surfaces                                         | $\text{g N m}^{-3}$            | [C23]             |                               |                                 |
| $[\text{H}_2\text{PO}_4^-_{\text{mm}}]$ | concentration of $\text{H}_2\text{PO}_4^-$ at root or mycorrhizal surfaces below<br>which $U_{\text{PO}_4} = 0$ | $\text{g N m}^{-3}$            | [C23]             | 0.002                         | Barber and<br>Silberbush (1984) |
| $N_{\text{leaf}}$                       | maximum leaf structural N content                                                                               | $\text{g N g C}^{-1}$          | [C12]             | 0.10                          |                                 |
| $N'_{\text{leaf}}$                      | minimum leaf structural N content                                                                               | $\text{g N g C}^{-1}$          | [C12]             | $0.33 \times N_{\text{leaf}}$ |                                 |
| $N_{\text{lf}}$                         | total leaf N                                                                                                    | $\text{g N m}^{-2}\text{leaf}$ | [C32,C33,C47,C48] |                               |                                 |
| $[N_{\text{chl(b4)}}]'$                 | ratio of chlorophyll N in $\text{C}_4$ bundle sheath to total leaf N                                            | $\text{g N g N}^{-1}$          | [C48]             | 0.05                          |                                 |
| $[N_{\text{chl(m4)}}]'$                 | ratio of chlorophyll N in $\text{C}_4$ mesophyll to total leaf N                                                | $\text{g N g N}^{-1}$          | [C33]             | 0.05                          |                                 |
| $[N_{\text{pep(m4)}}]'$                 | ratio of PEP carboxylase N in $\text{C}_4$ mesophyll to total leaf N                                            | $\text{g N g N}^{-1}$          | [C32]             | 0.025                         |                                 |

|                         |                                                                                     |                                     |            |                          |
|-------------------------|-------------------------------------------------------------------------------------|-------------------------------------|------------|--------------------------|
| $[N_{\text{rub}(b4)}]'$ | ratio of RuBP carboxylase N in C <sub>4</sub> bundle sheath to total leaf N         | g N g N <sup>-1</sup>               | [C47]      | 0.025                    |
| $O_{2q}$                | aqueous O <sub>2</sub> concentration in root or mycorrhizal aerenchyma              | g m <sup>-3</sup>                   | [C14c,d]   |                          |
| $O_{2r}$                | aqueous O <sub>2</sub> concentration at root or mycorrhizal surfaces                | g m <sup>-3</sup>                   | [C14c,d]   |                          |
| $O_{2s}$                | aqueous O <sub>2</sub> concentration in soil solution                               | g m <sup>-3</sup>                   | [C14c,d]   |                          |
| $O_c$                   | [O <sub>2</sub> ] in canopy chloroplasts in equilibrium with O <sub>2</sub> in atm. | μM                                  | [C6c,C6e]  |                          |
| $P_{\text{leaf}}$       | maximum leaf structural P content                                                   | g P g C <sup>-1</sup>               | [C12]      | 0.10                     |
| $P'_{\text{leaf}}$      | minimum leaf structural P content                                                   | g P g C <sup>-1</sup>               | [C12]      | 0.33 x $P_{\text{leaf}}$ |
| $P_{\text{prot}}$       | P content of protein remobilized from leaf or root                                  | g P C <sup>-1</sup>                 | [C12,C19b] | 0.04                     |
| $[\pi_{\text{fr}}]$     | concentration of nonstructural root P uptake product in leaf                        | g P g C <sup>-1</sup>               | [C49]      |                          |
| $\theta_P$              | root or mycorrhizal porosity                                                        | m <sup>3</sup> m <sup>-3</sup>      | [C21b]     | 0.1 – 0.5                |
| $R$                     | gas constant                                                                        | J mol <sup>-1</sup> K <sup>-1</sup> | [C10, C22] | 8.3143                   |
| $R$                     | gas constant                                                                        | J mol <sup>-1</sup> K <sup>-1</sup> | [C36]      | 8.3143                   |
| $R_a$                   | total autotrophic respiration                                                       | g C m <sup>-2</sup> h <sup>-1</sup> | [C13]      |                          |
| $R_a'$                  | $R_a$ under nonlimiting O <sub>2</sub>                                              | g C m <sup>-2</sup> h <sup>-1</sup> | [C14]      |                          |

|                          |                                                                            |                       |                            |                                                   |                         |
|--------------------------|----------------------------------------------------------------------------|-----------------------|----------------------------|---------------------------------------------------|-------------------------|
| $R_c'$                   | specific autotrophic respiration of $\sigma_{C_{i,j}}$ at $T_{ci} = 25$ °C | $g C g C^{-1} h^{-1}$ | [C14]                      | 0.015                                             |                         |
| $R_c$                    | autotrophic respiration of $\sigma_{C_{i,j}}$ or $\sigma_{C_{i,r,l}}$      | $g C m^{-2} h^{-1}$   | [C13,C14,C17,<br>C15]      |                                                   |                         |
| $R_g$                    | growth respiration                                                         | $g C m^{-2} h^{-1}$   | [C17,C20]                  |                                                   |                         |
| $r_{lf}$                 | leaf stomatal resistance                                                   | $s m^{-1}$            | [C25,C27,C39]              |                                                   |                         |
| $r_{lfmaxi}$             | leaf cuticular resistance                                                  | $s m^{-1}$            | [C27]                      |                                                   |                         |
| $r_{lfmini,j,k,l,m,n,o}$ | leaf stomatal resistance when $\psi_{ci} = 0$                              | $s m^{-1}$            | [C27,C28,C35]              |                                                   |                         |
| $r_{li,j,k,l,m,n,o}$     | leaf stomatal resistance                                                   | $s m^{-1}$            | [C2,C4,C9]                 |                                                   |                         |
| $r_{lmaxi}$              | leaf cuticular resistance                                                  | $s m^{-1}$            | [C4]                       |                                                   |                         |
| $r_{lmini,j,k,l,m,n,o}$  | leaf stomatal resistance when $\psi_{ci} = 0$                              | $s m^{-1}$            | [C4,C5,C9]                 |                                                   |                         |
| $R_m'$                   | specific maintenance respiration of $\sigma_{C_{i,j}}$ at $T_{ci} = 25$ °C | $g C g N^{-1} h^{-1}$ | [C16]                      | 0.0115                                            | Barnes et al.<br>(1998) |
| $R_{m,i,j}$              | above-ground maintenance respiration                                       | $g C m^{-2} h^{-1}$   | [C16,C17,C15]              |                                                   |                         |
| $r_{qi,r,l}$             | radius of root aerenchyma                                                  | m                     | [C14d]                     |                                                   |                         |
| $r_{ri,r,l}$             | root or mycorrhizal radius                                                 | m                     | [C14d,C21b,c,C23<br>a,c,e] | $1.0 \times 10^{-4}$ or $5.0 \times$<br>$10^{-6}$ |                         |

|                         |                                                   |                                   |                          |       |                                    |
|-------------------------|---------------------------------------------------|-----------------------------------|--------------------------|-------|------------------------------------|
| $R_{si,j}$              | respiration from remobilization of leaf C         | $\text{g C m}^{-2} \text{h}^{-1}$ | [C13,C15,C18,<br>C20]    |       |                                    |
| $r_{sl}$                | thickness of soil water films                     | m                                 | [C14d]                   |       |                                    |
| $\rho_r$                | dry matter content of root biomass                | $\text{g g}^{-1}$                 | [C21b]                   | 0.125 |                                    |
| $S$                     | change in entropy                                 | $\text{J mol}^{-1} \text{K}^{-1}$ | [C10, C22]               | 710   | Sharpe and<br>DeMichelle<br>(1977) |
| $S$                     | change in entropy                                 | $\text{J mol}^{-1} \text{K}^{-1}$ | [C36]                    | 710   |                                    |
| $\sigma_C$              | nonstructural C product of $\text{CO}_2$ fixation | $\text{g C g C}^{-1}$             | [C11, C19c,d,<br>C23g,h] |       |                                    |
| $\sigma_N$              | nonstructural N product of root uptake            | $\text{g N g C}^{-1}$             | [C11, C19c,<br>C23g,h]   |       |                                    |
| $\sigma_P$              | nonstructural P product of root uptake            | $\text{g P g C}^{-1}$             | [C11, C19d,<br>C23g,h]   |       |                                    |
| $T_c$                   | canopy temperature                                | K                                 | [C10, C22]               |       |                                    |
| $T_c$                   | canopy temperature                                | $^{\circ}\text{C}$                | [C36]                    |       |                                    |
| $U_{\text{NH}_4^+,r,l}$ | $\text{NH}_4^+$ uptake by roots or mycorrhizae    | $\text{g N m}^{-2} \text{h}^{-1}$ | [C23]                    |       |                                    |

|                          |                                                                                 |                                                          |                   |                      |                                 |
|--------------------------|---------------------------------------------------------------------------------|----------------------------------------------------------|-------------------|----------------------|---------------------------------|
| $U'_{\text{NH}_4}$       | maximum $U_{\text{NH}_4}$ at 25 °C and non-limiting $\text{NH}_4^+$             | $\text{g N m}^{-2} \text{h}^{-1}$                        | [C23]             | $5.0 \times 10^{-3}$ | Barber and<br>Silberbush (1984) |
| $U_{\text{NO}_3,i,r,l}$  | $\text{NO}_3^-$ uptake by roots or mycorrhizae                                  | $\text{g N m}^{-2} \text{h}^{-1}$                        | [C23]             |                      |                                 |
| $U'_{\text{NO}_3}$       | maximum $U_{\text{NO}_3}$ at 25 °C and non-limiting $\text{NO}_3^-$             | $\text{g N m}^{-2} \text{h}^{-1}$                        | [C23]             | $5.0 \times 10^{-3}$ | Barber and<br>Silberbush (1984) |
| $U_{\text{PO}_4,i,r,l}$  | $\text{H}_2\text{PO}_4^-$ uptake by roots or mycorrhizae                        | $\text{g N m}^{-2} \text{h}^{-1}$                        | [C23]             |                      |                                 |
| $U'_{\text{PO}_4}$       | maximum $U_{\text{PO}_4}$ at 25 °C and non-limiting $\text{H}_2\text{PO}_4^-$   | $\text{g N m}^{-2} \text{h}^{-1}$                        | [C23]             | $5.0 \times 10^{-3}$ | Barber and<br>Silberbush (1984) |
| $U_{\text{O}_2,i,r,l}$   | $\text{O}_2$ uptake by roots and mycorrhizae under ambient $\text{O}_2$         | $\text{g O m}^{-2} \text{h}^{-1}$                        | [C14b,c,C23b,d,f] |                      |                                 |
| $U'_{\text{O}_2,i,r,l}$  | $\text{O}_2$ uptake by roots and mycorrhizae under nonlimiting $\text{O}_2$     | $\text{g O m}^{-2} \text{h}^{-1}$                        | [C14b,c,C23b,d,f] |                      |                                 |
| $U_{w,i,r,l}$            | root water uptake                                                               | $\text{m}^3 \text{m}^{-2} \text{h}^{-1}$                 | [C14d,C23]        |                      |                                 |
| $V_{\phi(b4)i,j,k}$      | $\text{CO}_2$ leakage from $\text{C}_4$ bundle sheath to $\text{C}_4$ mesophyll | $\text{g C m}^{-2} \text{h}^{-1}$                        | [C39,C42]         |                      |                                 |
| $V_b'$                   | specific rubisco carboxylation at 25 °C                                         | $\mu\text{mol g}^{-1} \text{rubisco}$<br>$\text{s}^{-1}$ | [C6b]             | 45                   | Farquhar et al.<br>(1980)       |
| $V_{b(b4)i,j,k}$         | $\text{CO}_2$ -limited carboxylation rate in $\text{C}_4$ bundle sheath         | $\mu\text{mol m}^{-2} \text{s}^{-1}$                     | [C43,C44]         |                      |                                 |
| $V_{b(m4)i,j,k,l,m,n,o}$ | $\text{CO}_2$ -limited carboxylation rate in $\text{C}_4$ mesophyll             | $\mu\text{mol m}^{-2} \text{s}^{-1}$                     | [C26]             |                      |                                 |
| $V_{b i,j,k,l,m,n,o}$    | $\text{CO}_2$ -limited leaf carboxylation rate                                  | $\mu\text{mol m}^{-2} \text{s}^{-1}$                     | [C3,C6]           |                      |                                 |

|                                 |                                                                                                                               |                                      |                   |     |
|---------------------------------|-------------------------------------------------------------------------------------------------------------------------------|--------------------------------------|-------------------|-----|
| $V_{\text{bmax}(b4)'}'$         | RuBP carboxylase specific activity in C <sub>4</sub> bundle sheath at 25°C when $\psi_{ci} = 0$ and nutrients are nonlimiting | $\mu\text{mol g}^{-1} \text{s}^{-1}$ | [C47]             | 75  |
| $V_{\text{bmax}(b4)ij,k}$       | CO <sub>2</sub> -nonlimited carboxylation rate in C <sub>4</sub> bundle sheath                                                | $\mu\text{mol m}^{-2} \text{s}^{-1}$ | [C44,C47]         |     |
| $V_{\text{bmax}(m4)'}'$         | PEP carboxylase specific activity in C <sub>4</sub> mesophyll at 25°C when $\psi_{ci} = 0$ and nutrients are nonlimiting      | $\mu\text{mol g}^{-1} \text{s}^{-1}$ | [C32]             | 150 |
| $V_{\text{bmax}(m4)ij,k}$       | CO <sub>2</sub> -nonlimited carboxylation rate in C <sub>4</sub> mesophyll                                                    | $\mu\text{mol m}^{-2} \text{s}^{-1}$ | [C29,C32]         |     |
| $V_{\text{bmax}ij,k}$           | leaf carboxylation rate at non-limiting CO <sub>2</sub> , $\psi_{ci}$ , $T_c$ and N,P                                         | $\mu\text{mol m}^{-2} \text{s}^{-1}$ | [C6a,C6b,C6c]     |     |
| $V_{\text{c}(b4)ij,k,l,m,n,o}$  | CO <sub>2</sub> fixation rate in C <sub>4</sub> bundle sheath                                                                 | $\mu\text{mol m}^{-2} \text{s}^{-1}$ | [C43]             |     |
| $V_{\text{c}(m4)ij,k,l,m,n,o}$  | CO <sub>2</sub> fixation rate in C <sub>4</sub> mesophyll                                                                     | $\mu\text{mol m}^{-2} \text{s}^{-1}$ | [C24,C26,C40,C41] |     |
| $V_{\text{c0}(m4)ij,k,l,m,n,o}$ | CO <sub>2</sub> fixation rate in C <sub>4</sub> mesophyll when $\psi_{ci} = 0$ MPa                                            | $\mu\text{mol m}^{-2} \text{s}^{-1}$ | [C28]             |     |
| $V_{ci,j,k,l,m,n,o}$            | leaf CO <sub>2</sub> fixation rate                                                                                            | $\mu\text{mol m}^{-2} \text{s}^{-1}$ | [C1,C3]           |     |
| $V_{c'ij,k,l,m,n,o}$            | leaf CO <sub>2</sub> fixation rate when $\psi_{ci} = 0$                                                                       | $\mu\text{mol m}^{-2} \text{s}^{-1}$ | [C5]              |     |
| $V_{\text{g}(m4)ij,k,l,m,n,o}$  | CO <sub>2</sub> diffusion rate into C <sub>4</sub> mesophyll                                                                  | $\mu\text{mol m}^{-2} \text{s}^{-1}$ | [C24,C25]         |     |
| $V_{gi,j,k,l,m,n,o}$            | leaf CO <sub>2</sub> diffusion rate                                                                                           | $\mu\text{mol m}^{-2} \text{s}^{-1}$ | [C1,C2]           |     |

|                                     |                                                                                            |                                                       |               |     |                           |
|-------------------------------------|--------------------------------------------------------------------------------------------|-------------------------------------------------------|---------------|-----|---------------------------|
| $V_j'$                              | specific chlorophyll $e^-$ transfer at 25 °C                                               | $\mu\text{mol g}^{-1}$<br>chlorophyll $\text{s}^{-1}$ | [C8b]         | 450 | Farquhar et al.<br>(1980) |
| $V_{j(\text{b4})i,j,k,l,m,n,o}$     | irradiance-limited carboxylation rate in $\text{C}_4$ bundle sheath                        | $\mu\text{mol m}^{-2} \text{s}^{-1}$                  | [C43,C45]     |     |                           |
| $V_{j(\text{m4})i,j,k,l,m,n,o}$     | irradiance-limited carboxylation rate in $\text{C}_4$ mesophyll                            | $\mu\text{mol m}^{-2} \text{s}^{-1}$                  | [C26,C30]     |     |                           |
| $V_{j,i,j,k,l,m,n,o}$               | irradiance-limited leaf carboxylation rate                                                 | $\mu\text{mol m}^{-2} \text{s}^{-1}$                  | [C3,C7]       |     |                           |
| $V_o'$                              | specific rubisco oxygenation at 25 °C                                                      | $\mu\text{mol g}^{-1}$ rubisco<br>$\text{s}^{-1}$     | [C6d]         | 9.5 | Farquhar et al.<br>(1980) |
| $V_{\text{omax},i,j,k}$             | leaf oxygenation rate at non-limiting $\text{O}_2$ , $\psi_{\text{ci}}$ , $T_c$ and N,P    | $\mu\text{mol m}^{-2} \text{s}^{-1}$                  | [C6c,d]       |     |                           |
| $V_{\chi\text{C4}(\text{b4})i,j,k}$ | decarboxylation of $\text{C}_4$ fixation product in $\text{C}_4$ bundle sheath             | $\text{g C m}^{-2} \text{h}^{-1}$                     | [C38,C41,C42] |     |                           |
| $V_{\chi\text{C4}(\text{m4})}$      | transfer of $\text{C}_4$ fixation product between $\text{C}_4$ mesophyll and bundle sheath | $\text{g C m}^{-2} \text{h}^{-1}$                     | [C37]         |     |                           |
| $[V_{\text{f}}]$                    | concentration of nonstructural root N uptake product in leaf                               | $\text{g N g C}^{-1}$                                 | [C49]         |     |                           |
| $v_r$                               | specific volume of root biomass                                                            | $\text{m}^3 \text{g}^{-1}$                            | [C21b]        |     |                           |
| $W_{\text{f}(\text{b4})}$           | $\text{C}_4$ bundle sheath water content                                                   | $\text{g m}^{-2}$                                     | [C37,C39]     |     |                           |
| $W_{\text{f}(\text{m4})}$           | $\text{C}_4$ mesophyll water content                                                       | $\text{g m}^{-2}$                                     | [C37]         |     |                           |



|                 |                                                                                             |                                              |           |                                                                                                               |                           |
|-----------------|---------------------------------------------------------------------------------------------|----------------------------------------------|-----------|---------------------------------------------------------------------------------------------------------------|---------------------------|
| $X_{mx}$        | maximum fraction of remobilizable N or P translocated out of leaf or root during senescence | -                                            | [C19a,b]  | 0.6                                                                                                           | Kimmins (2004)            |
| $Y_{(b4)}$      | carboxylation yield from electron transport in C <sub>4</sub> bundle sheath                 | $\mu\text{mol CO}_2 \mu\text{mol e}^-$<br>-1 | [C45]     |                                                                                                               |                           |
| $Y_{(m4)}$      | carboxylation yield from electron transport in C <sub>4</sub> mesophyll                     | $\mu\text{mol CO}_2 \mu\text{mol e}^-$<br>-1 | [C30]     |                                                                                                               |                           |
| $Y_g$           | fraction of $\sigma_{C_{ij}}$ used for growth expended as $R_{g_{ij,z}}$ by organ $z$       | $\text{g C g C}^{-1}$                        | [C20]     | 0.28 ( $z = \text{leaf}$ ),<br>0.24 ( $z = \text{root and other non-foliar}$ ),<br>0.20 ( $z = \text{wood}$ ) | Waring and Running (1998) |
| $y$             | plant population                                                                            | $\text{m}^{-2}$                              | [C21]     |                                                                                                               |                           |
| $Y$             | carboxylation yield                                                                         | $\mu\text{mol CO}_2 \mu\text{mol e}^-$<br>-1 | [C7]      |                                                                                                               |                           |
| $\Gamma$        | CO <sub>2</sub> compensation point                                                          | $\mu\text{M}$                                | [C6a,C6c] |                                                                                                               |                           |
| $\Gamma_{(b4)}$ | CO <sub>2</sub> compensation point in C <sub>4</sub> bundle sheath                          | $\mu\text{M}$                                | [C44]     |                                                                                                               |                           |
| $\Gamma_{(m4)}$ | CO <sub>2</sub> compensation point in C <sub>4</sub> mesophyll                              | $\mu\text{M}$                                | [C29]     |                                                                                                               |                           |

|                     |                                                                               |                                               |               |                      |                          |
|---------------------|-------------------------------------------------------------------------------|-----------------------------------------------|---------------|----------------------|--------------------------|
| $\alpha$            | shape parameter for response of $J$ to $I$                                    | -                                             | [C8a]         | 0.7                  |                          |
| $\alpha$            | shape parameter for response of $J$ to $I$                                    | -                                             | [C31,C46]     | 0.75                 |                          |
| $\chi$              | area:mass ratio of leaf growth                                                | $\text{m g}^{-3}$                             | [C21]         | 0.0125               | Grant and Hesketh (1992) |
| $\chi_{C_4(b_4)}$   | non-structural $C_4$ fixation product in $C_4$ bundle sheath                  | $\text{g C m}^{-2}$                           | [C37,C38,C41] |                      |                          |
| $\chi_{C_4(m_4)}$   | non-structural $C_4$ fixation product in $C_4$ mesophyll                      | $\text{g C m}^{-2}$                           | [C37,C40]     |                      |                          |
| $[\chi_{C_3(b_4)}]$ | concentration of non-structural $C_3$ fixation product in $C_4$ bundle sheath | $\text{g g}^{-1}$                             | [C49]         |                      |                          |
| $[\chi_{C_4(m_4)}]$ | concentration of non-structural $C_4$ fixation product in $C_4$ mesophyll     | $\mu\text{M}$                                 | [C34]         |                      |                          |
| $\varepsilon$       | quantum yield                                                                 | $\mu\text{mol e}^- \mu\text{mol quanta}^{-1}$ | [C8a]         | 0.45                 | Farquhar et al. (1980)   |
| $\varepsilon$       | quantum yield                                                                 | $\mu\text{mol e}^- \mu\text{mol quanta}^{-1}$ | [C31,C46]     | 0.45                 | Farquhar et al. (1980)   |
| $\kappa_{C_4(b_4)}$ | conductance to $\text{CO}_2$ leakage from $C_4$ bundle sheath                 | $\text{h}^{-1}$                               | [C39]         | 20                   |                          |
| $\psi_c$            | canopy turgor potential                                                       | MPa                                           | [C4]          | 1.25 at $\psi_c = 0$ |                          |

## Appendix D: Soil water, heat, gas and solute fluxes

### Surface water flux

|                                                                                                                                    |                                                             |       |
|------------------------------------------------------------------------------------------------------------------------------------|-------------------------------------------------------------|-------|
| $Q_{rx(x,y)} = v_{x(x,y)}d_{mx,y}L_y(x,y)$                                                                                         | 2D Manning equation in x (EW)                               | [D1]  |
| $Q_{ry(x,y)} = v_{y(x,y)}d_{mx,y}L_x(x,y)$                                                                                         | and y (NS) directions                                       |       |
| $d_{x,y} = \max(0, d_{w(x,y)} + d_{i(x,y)} - d_{s(x,y)})d_{w(x,y)}/(d_{w(x,y)} + d_{i(x,y)})$                                      | surface water depth                                         | [D2]  |
| $v_{x(x,y)} = R^{0.67} s_{x(x,y)}^{0.5}/z_{r(x,y)}$                                                                                | runoff velocity over E slope                                | [D3]  |
| $v_{y(x,y)} = R^{0.67} s_{y(x,y)}^{0.5}/z_{r(x,y)}$                                                                                | runoff velocity over S slope                                |       |
| $v_{\bar{x}(x,y)} = -R^{0.67} s_{x(x,y)}^{0.5}/z_{r(x,y)}$                                                                         | runoff velocity over W slope                                |       |
| $v_{\bar{y}(x,y)} = -R^{0.67} s_{y(x,y)}^{0.5}/z_{r(x,y)}$                                                                         | runoff velocity over N slope                                |       |
| $\Delta(d_{w(x,y)}A_{x,y})/\Delta t = Q_{r,x(x,y)} - Q_{r,x+1(x,y)} + Q_{r,y(x,y)} - Q_{r,y+1(x,y)} + P - E_{x,y} - Q_{wz(x,y,J)}$ | 2D kinematic wave theory for overland flow                  | [D4]  |
| $R = s_r d_m / [2(s_r^2 + 1)0.5]$                                                                                                  | wetted perimeter                                            | [D5a] |
| $s_{x(x,y)} = 2abs[(Z + d_s + d_m)_{x,y} - (Z + d_s + d_m)_{x+1,y}]/(L_{x(x,y)} + L_{x(x+1,y)})$                                   | 2D slope from topography and pooled surface water in x (EW) | [D5b] |
| $s_{y(x,y)} = 2abs[(Z + d_s + d_m)_{x,y} - (Z + d_s + d_m)_{x,y+1}]/(L_{y(x,y)} + L_{y(x,y+1)})$                                   | and y (NS) directions                                       |       |

$$LE_l = L (e_a - e_{l(T_l, \psi_l)}) / r_{al}$$

evaporation from surface litter [D6a]

$$LE_s = L (e_a - e_{s(T_s, \psi_s)}) / r_{as}$$

evaporation from soil surface [D6b]

### Subsurface water flux

$$Q_{wx(x,y,z)} = K'_x (\psi_{xx,y,z} - \psi_{sx+I,y,z})$$

$$Q_{wy(x,y,z)} = K'_y (\psi_{xx,y,z} - \psi_{sx,y+I,z})$$

$$Q_{wz(x,y,z)} = K'_z (\psi_{xx,y,z} - \psi_{sx,y,z+I})$$

3D Richard's or Green-Ampt [D7]

equation depending on saturation of source or target cell in  $x$  (EW),  $y$  (NS) and  $z$  (vertical) directions

$$\Delta \theta_{w,x,y,z} / \Delta t = (Q_{wx(x,y)} - Q_{wx+I(x,y)} + Q_{wy(x,y)} - Q_{wy+I(x,y)} + Q_{wz(x,y)} - Q_{wz+I(x,y)} + Q_{f(x,y,z)}) / L_{z(x,y,z)}$$

3D water transfer plus freeze-thaw [D8]

$$K'_x = 2K_{x,y,z}K_{x+I,y,z} / (K_{x,y,z}L_{x,(x+I,y,z)} + K_{x+I,y,z}L_{x,(x,y,z)})$$

in direction  $x$  if source and [D9a]

destination cells are unsaturated

$$= 2K_{x,y,z} / (L_{x,(x+I,y,z)} + L_{x,(x,y,z)})$$

in direction  $x$  if source cell is [D9b]

saturated

$$= 2K_{x+I,y,z} / (L_{x,(x+I,y,z)} + L_{x,(x,y,z)})$$

in direction  $x$  if destination cell is

saturated

$$K'_y = 2K_{x,y,z}K_{x,y+I,z} / (K_{x,y,z}L_{y,(x,y+I,z)} + K_{x,y+I,z}L_{y,(x,y,z)})$$

in direction  $y$  if source and [D9a]

destination cells are unsaturated

$$= 2K_{x,y,z}/(L_{y(x,y+I,z)} + L_{y(x,y,z)})$$

in direction y if source cell is [D9b]

saturated

$$= 2K_{x,y+I,z}/(L_{y(x,y+I,z)} + L_{y(x,y,z)})$$

in direction y if destination cell is

saturated

$$K'_z = 2K_{x,y,z}K_{x,y,z+I}/(K_{x,y,z}L_{z(x,y,z+I)} + K_{x,y,z+I}L_{z(x,y,z)})$$

in direction z if source and [D9a]

destination cells are unsaturated

$$= 2K_{x,y,z}/(L_{z(x,y,z+I)} + L_{z(x,y,z)})$$

in direction z if source cell is [D9b]

saturated

$$= 2K_{x,y,z+I}/(L_{z(x,y,z+I)} + L_{z(x,y,z)})$$

in direction z if destination cell is

saturated

### Exchange with water table

$$Q_{mat_{tx}(x,y,z)} = K_{mat_{tx,y,z}} [\psi' - \psi_{sx,y,z} + 0.01(d_{zx,y,z} - WTD_x)] / (L_{tx} + 0.5 L_{x,(x,y,z)})$$

if  $d_{zx,y,z} < WTD_x$  then  $\psi_{sx,y,z} > \psi' +$  [D10]

$0.01(d_{zx,y,z} - WTD_x)$  for all depths

z from  $d_{zx,y,z}$  to  $WTD_x$

or if  $d_{zx,y,z} > WTD_x$  then  $\psi_{sx,y,z} >$

$0.01(WTD_x - d_{zx,y,z}) - \psi'$  for all

depths z from  $WTD_x$  to  $d_{zx,y,z}$

$$Q_{mat_{tx}(x,y,z)} = K_{mat_{tx,y,z}} [\psi' - \psi_{sx,y,z} + 0.01(d_{zx,y,z} - WTD_x)] / (L_{tx} + 0.5 L_{x,(x,y,z)})$$

$$Q_{mac_{lx(x,y,z)}} = K_{mac_{x,y,z}} [0.01 * \min(0, d_{zx,y,z} - L_{z(x,y,z)} * (\min(1, \max(0, \theta_{mac})) - 0.5) - WTD_x)] / (L_{lx} + 0.5 L_{x(x,y,z)}) \quad \text{if } d_{zx,y,z} < WTD_x \text{ then } \psi_{sx,y,z} > \psi' + \quad [D10a]$$

0.01( $d_{zx,y,z} - WTD_x$ ) for all depths

$z$  from  $d_{zx,y,z}$  to  $WTD_x$

$$Q_{mac_{lx(x,y,z)}} = K_{mac_{x,y,z}} [0.01 * \max(0, d_{zx,y,z} - L_{z(x,y,z)} * (\min(1, \max(0, \theta_{mac})) - 0.5) - WTD_x)] / (L_{lx} + 0.5 L_{x(x,y,z)}) \quad \text{or if } d_{zx,y,z} > WTD_x \text{ then } \psi_{sx,y,z} >$$

0.01( $WTD_x - d_{zx,y,z}$ ) -  $\psi'$  for all

depths  $z$  from  $WTD_x$  to  $d_{zx,y,z}$

## Heat flux

$$R_n + LE + H + G = 0$$

for each canopy, snow, residue [D11]

and soil surface, depending on

exposure

$$G_{x(x,y,z)} = 2 \kappa_{(x,y,z),(x+1,y,z)} (T_{(x,y,z)} - T_{(x+1,y,z)}) / (L_x(x,y,z) + L_x(x+1,y,z)) + c_w T_{(x,y,z)} Q_{wx(x,y,z)}$$

3D conductive – convective heat [D12]

$$G_{y(x,y,z)} = 2 \kappa_{(x,y,z),(x,y+1,z)} (T_{(x,y,z)} - T_{(x,y+1,z)}) / (L_y(x,y,z) + L_y(x,y+1,z)) + c_w T_{(x,y,z)} Q_{wy(x,y,z)}$$

flux among snowpack, surface

$$G_{z(x,y,z)} = 2 \kappa_{(x,y,z),(x,y,z+1)} (T_{(x,y,z)} - T_{(x,y,z+1)}) / (L_z(x,y,z) + L_z(x,y,z+1)) + c_w T_{(x,y,z)} Q_{wz(x,y,z)}$$

residue and soil layers in  $x$  (EW),  $y$

(NS) and  $z$  (vertical) directions

$$G_{x(x-l,y,z)} - G_{x(x,y,z)} + G_{y(x,y-l,z)} - G_{y(x,y,z)} + G_{z(x,y,z-l)} - G_{z(x,y,z)} + LQ_{f(x,y,z)} + c_{(x,y,z)} (T_{(x,y,z)} - T'_{(x,y,z)})/\Delta t = 0$$

3D general heat flux equation in [D13]  
snowpack, surface residue and soil  
layers

### Gas flux

$$Q_{ds\gamma x,y,z} = a_{gsx,y,z} D_{d\gamma} (S'_{\gamma} f_{d\gamma x,y,z} [\gamma_{gs}]_{x,y,z} - [\gamma_{ss}]_{x,y,z})$$

volatilization – dissolution [D14a]

$$Q_{dr\gamma x,y,z} = a_{grx,y,z} D_{d\gamma} (S'_{\gamma} f_{d\gamma x,y,z} [\gamma_{gr}]_{x,y,z} - [\gamma_{sr}]_{x,y,z})$$

between aqueous and gaseous [D14b]  
phases in soil and root

$$Q_{gs\gamma z x,y,l} = g_{ax,y} \{ [\gamma_a] - \{ 2[\gamma_{gs}]_{x,y,l} D_{gs\gamma z(x,y,l)}/L_{z(x,y,l)} + g_{ax,y} [\gamma_a] \} / \{ 2 D_{gs\gamma z(x,y,l)}/L_{z(x,y,l)} + g_{ax,y} \} \}$$

volatilization – dissolution [D15a]  
between gaseous and aqueous

$$Q_{ds\gamma x,y,l} = a_{gsx,y,l} D_{d\gamma} (S'_{\gamma} f_{d\gamma x,y,l} [\gamma_a] - [\gamma_{ss}]_{x,y,l})$$

phases at the soil surface ( $z = l$ ) [D15b]  
and the atmosphere

$$Q_{gsyx(x,y,z)} = -Q_{wx(x,y,z)} [\gamma_{gs}]_{x,y,z} + 2 D_{gsyx(x,y,z)} ([\gamma_{gs}]_{x,y,z} - [\gamma_{gs}]_{x+1,y,z}) / (L_x(x,y,z) + L_x(x+1,y,z)) \quad [D16a]$$

3D convective - conductive gas  
flux among soil layers in x (EW), y

$$Q_{gsyy(x,y,z)} = -Q_{wy(x,y,z)} [\gamma_{gs}]_{x,y,z} + 2 D_{gsyy(x,y,z)} ([\gamma_{gs}]_{x,y,z} - [\gamma_{gs}]_{x,y+1,z}) / (L_y(x,y,z) + L_y(x,y+1,z)) \quad [D16b]$$

(NS) and z (vertical) directions, [D16b]

$$Q_{gsyz(x,y,z)} = -Q_{wz(x,y,z)} [\gamma_{gs}]_{x,y,z} + 2 D_{gsyz(x,y,z)} ([\gamma_{gs}]_{x,y,z} - [\gamma_{gs}]_{x,y,z+1}) / (L_z(x,y,z) + L_z(x,y,z+1)) \quad [D16c]$$

convective - conductive gas

$$Q_{gryz(x,y,z)} = D_{gryz(x,y,z)} ([\gamma_a]_{x,y,z} - [\gamma_a]) / \Sigma_{1,z} L_z(x,y,z) \quad [D16d]$$

flux between roots and the  
atmosphere [D16d]

$$D_{gsyx(x,y,z)} = D'_{gy} f_{gx,y,z} [0.5(\theta_{gx,y,z} + \theta_{gx+1,y,z})]^2 / \theta_{psx,y,z}^{0.67} \quad [D17a]$$

gaseous diffusivity as a function  
of air-filled porosity in soil [D17a]

$$D_{gsyy(x,y,z)} = D'_{gy} f_{gy,y,z} [0.5(\theta_{gy,y,z} + \theta_{gy,y+1,z})]^2 / \theta_{psx,y,z}^{0.67} \quad [D17b]$$

[D17b]

$$D_{gsyz(x,y,z)} = D'_{gy} f_{gz,y,z} [0.5(\theta_{gz,y,z} + \theta_{gz,y,z+1})]^2 / \theta_{psx,y,z}^{0.67} \quad [D17c]$$

gaseous diffusivity as a function

$$D_{gryz(x,y,z)} = D'_{gy} f_{gx,y,z} \theta_{prx,y,z}^{1.33} A_r(x,y,z) / A_{x,y} \quad [D17d]$$

of air-filled porosity in roots [D17d]

$$Q_{byz} = \min[0.0, \{(44.64 \theta_{wxy,z} 273.16/T_{(x,y,z)} - \Sigma_\gamma([\gamma_s]_{x,y,z} / (S'_{\gamma} f_{d,\gamma,x,y,z} M_\gamma))\}] \quad [D18]$$

bubbling (-ve flux) when total of

$$([\gamma_s]_{x,y,z} / (S'_{\gamma} f_{d,\gamma,x,y,z} M_\gamma)) / \Sigma_\gamma([\gamma_s]_{x,y,z} / (S'_{\gamma} f_{d,\gamma,x,y,z} M_\gamma)) S'_{\gamma} f_{d,\gamma,x,y,z} M_\gamma V_{x,y,z}$$

all partial gas pressures exceeds  
atmospheric pressure [D18]



## Solute flux

$$Q_{s\gamma x(x,y,z)} = -Q_{wx(x,y,z)} [\gamma]_{x,y,z} + 2 D_{s\gamma x(x,y,z)} ([\gamma]_{x,y,z} - [\gamma]_{x+I,y,z}) / (L_x(x,y,z) + L_x(x+I,y,z))$$

3D convective - dispersive solute [D19]

flux among soil layers in x (EW), y

(NS) and z (vertical) directions

$$Q_{s\gamma y(x,y,z)} = -Q_{wy(x,y,z)} [\gamma]_{x,y,z} + 2 D_{s\gamma y(x,y,z)} ([\gamma]_{x,y,z} - [\gamma]_{x,y+I,z}) / (L_y(x,y,z) + L_y(x,y+I,z))$$

$$Q_{s\gamma z(x,y,z)} = -Q_{wz(x,y,z)} [\gamma]_{x,y,z} + 2 D_{s\gamma z(x,y,z)} ([\gamma]_{x,y,z} - [\gamma]_{x,y,z+I}) / (L_z(x,y,z) + L_z(x,y,z+I))$$

$$D_{s\gamma x(x,y,z)} = D_{qx(x,y,z)} |Q_{wx(x,y,z)}| + D'_{s\gamma} f_{sx,y,z} [0.5(\theta_{wx,y,z} + \theta_{wx+I,y,z})] \tau$$

aqueous dispersivity as functions [D20]

of water flux and water-filled

porosity

$$D_{s\gamma y(x,y,z)} = D_{qy(x,y,z)} |Q_{wy(x,y,z)}| + D'_{s\gamma} f_{sy,x,y,z} [0.5(\theta_{wx,y,z} + \theta_{wx+I,y,z})] \tau$$

$$D_{s\gamma z(x,y,z)} = D_{qz(x,y,z)} |Q_{wz(x,y,z)}| + D'_{s\gamma} f_{sz,y,z} [0.5(\theta_{wx,y,z} + \theta_{wx+I,y,z})] \tau$$

$$D_{qx(x,y,z)} = 0.5 \alpha (L_x(x,y,z) + L_x(x+I,y,z))^\beta$$

dispersivity as a function of water [D21]

flow length

$$D_{qy(x,y,z)} = 0.5 \alpha (L_y(x,y,z) + L_y(x,y+I,z))^\beta$$

$$D_{qz(x,y,z)} = 0.5 \alpha (L_z(x,y,z) + L_z(x,y,z+I))^\beta$$

## Definition of variables in appendix D

| Variable          | Definition                                                         | Unit                      | Equation    | Value                                                         | Reference    |
|-------------------|--------------------------------------------------------------------|---------------------------|-------------|---------------------------------------------------------------|--------------|
| <i>Subscripts</i> |                                                                    |                           |             |                                                               |              |
| $x$               | grid cell position in west to east direction                       |                           |             |                                                               |              |
| $y$               | grid cell position in north to south direction                     |                           |             |                                                               |              |
| $z$               | grid cell position in vertical direction                           |                           |             | $z = 0$ : surface<br>residue, $z = 1$ to<br>$n$ : soil layers |              |
| <i>Variables</i>  |                                                                    |                           |             |                                                               |              |
| $A$               | area of landscape position                                         | $m^2$                     | [D17c]      |                                                               |              |
| $A_r$             | root cross-sectional area of landscape position                    | $m^2$                     | [D17c]      |                                                               |              |
| $a_{gr}$          | air-water interfacial area in roots                                | $m^2 m^{-2}$              | [D14b]      |                                                               |              |
| $a_{gs}$          | air-water interfacial area in soil                                 | $m^2 m^{-2}$              | [D14a,D15b] |                                                               | Skopp (1985) |
| $\alpha$          | dependence of $D_q$ on $L$                                         | -                         | [D21]       |                                                               |              |
| $\beta$           | dependence of $D_q$ on $L$                                         | -                         | [D21]       |                                                               |              |
| $c$               | heat capacity of soil                                              | $MJ m^{-2} ^\circ C^{-1}$ | [D13]       |                                                               |              |
| $c_w$             | heat capacity of water                                             | $MJ m^{-3} ^\circ C^{-1}$ | [D12]       | 4.19                                                          |              |
| $D_{d\gamma}$     | volatilization - dissolution transfer coefficient for gas $\gamma$ | $m^2 h^{-1}$              | [D14,D15a]  |                                                               |              |

|                |                                               |                     |                              |                                                                          |
|----------------|-----------------------------------------------|---------------------|------------------------------|--------------------------------------------------------------------------|
| $D_{gr\gamma}$ | gaseous diffusivity of gas $\gamma$ in roots  | $m^2 h^{-1}$        | [D16d,D17d]                  | Luxmoore et al.<br>(1970a, b)                                            |
| $D_{gs\gamma}$ | gaseous diffusivity of gas $\gamma$ in soil   | $m^2 h^{-1}$        | [D15a,D16a,b,c,D<br>17a,b,c] | Millington and<br>Quirk (1960)                                           |
| $D'_{g\gamma}$ | diffusivity of gas $\gamma$ in air at 0 °C    | $m^2 h^{-1}$        | [D17]                        | 6.43 x 10 <sup>-2</sup> for $\gamma =$<br>O <sub>2</sub> Campbell (1985) |
| $D_q$          | dispersivity                                  | m                   | [D20,D21]                    |                                                                          |
| $D_{s\gamma}$  | aqueous diffusivity of gas or solute $\gamma$ | $m^2 h^{-1}$        | [D19,D20]                    |                                                                          |
| $D'_{s\gamma}$ | diffusivity of gas $\gamma$ in water at 0 °C  | $m^2 h^{-1}$        | [D20]                        | 8.57 x 10 <sup>-6</sup> for $\gamma =$<br>O <sub>2</sub> Campbell (1985) |
| $d_m$          | depth of mobile surface water                 | m                   | [D1,D2,D5a,D6]               |                                                                          |
| $d_i$          | depth of surface ice                          | m                   | [D2]                         |                                                                          |
| $d_s$          | maximum depth of surface water storage        | m                   | [D2,D5b]                     |                                                                          |
| $WTD_x$        | external water table depth                    | m                   | [D10]                        |                                                                          |
| $d_w$          | depth of surface water                        | m                   | [D1,D2]                      |                                                                          |
| $d_z$          | depth to mid-point of soil layer              | m                   | [D10]                        |                                                                          |
| $E$            | evaporation or transpiration flux             | $m^3 m^{-2} h^{-1}$ | [D4,D11]                     |                                                                          |
| $e_a$          | atmospheric vapor density                     | $m^3 m^{-3}$        | [D6]                         |                                                                          |

|                    |                                                                                                                                                         |                                          |                                 |                          |
|--------------------|---------------------------------------------------------------------------------------------------------------------------------------------------------|------------------------------------------|---------------------------------|--------------------------|
| $e_l(T_l, \psi_l)$ | surface litter vapor density at current $T_l$ and $\psi_l$                                                                                              | $\text{g m}^{-3}$                        | [D6a]                           |                          |
| $e_s(T_s, \psi_s)$ | soil surface vapor density at current $T_s$ and $\psi_s$                                                                                                | $\text{g m}^{-3}$                        | [D6b]                           |                          |
| $f_{d,\gamma}$     | temperature dependence of $S'_\gamma$                                                                                                                   | -                                        | [D14,D15b,D18]                  | Wilhelm et al.<br>(1977) |
| $f_g$              | temperature dependence of $D'_{g\gamma}$                                                                                                                | -                                        | [D17]                           | Campbell (1985)          |
| $f_s$              | temperature dependence of $D'_{s\gamma}$                                                                                                                | -                                        | [D20]                           | Campbell (1985)          |
| $G$                | soil surface heat flux                                                                                                                                  | $\text{m}^3 \text{m}^{-2} \text{h}^{-1}$ | [D11]                           |                          |
| $G_x, G_y, G_z$    | soil heat flux in $x, y$ or $z$ directions                                                                                                              | $\text{MJ m}^{-2} \text{h}^{-1}$         | [D12,D13]                       |                          |
| $g_a$              | boundary layer conductance                                                                                                                              | $\text{m h}^{-1}$                        | [D15a]                          |                          |
| $\gamma$           | gas ( $\text{H}_2\text{O}, \text{CO}_2, \text{O}_2, \text{CH}_4, \text{NH}_3, \text{N}_2\text{O}, \text{N}_2, \text{H}_2$ ) or solute (from appendix E) |                                          | [D14,D15]                       |                          |
| $[\gamma_a]$       | atmospheric concentration of gas $\gamma$                                                                                                               | $\text{g m}^{-3}$                        | [D15,D16d]                      |                          |
| $[\gamma_{gr}]$    | gaseous concentration of gas $\gamma$ in roots                                                                                                          | $\text{g m}^{-3}$                        | [D14b,D16d]                     |                          |
| $[\gamma_{gs}]$    | gaseous concentration of gas $\gamma$ in soil                                                                                                           | $\text{g m}^{-3}$                        | [D14a,D15a,D16a,<br>,D16b,D16c] |                          |
| $[\gamma_r]$       | aqueous concentration of gas $\gamma$ in roots                                                                                                          | $\text{g m}^{-3}$                        | [D14b]                          |                          |
| $[\gamma_s]$       | aqueous concentration of gas $\gamma$ in soil                                                                                                           | $\text{g m}^{-3}$                        | [D14a,D15b,D18,<br>D19]         |                          |

|                    |                                                                         |                                                 |                                     |                                  |
|--------------------|-------------------------------------------------------------------------|-------------------------------------------------|-------------------------------------|----------------------------------|
| $H$                | sensible heat flux                                                      | $\text{MJ m}^{-2} \text{h}^{-1}$                | [D11]                               |                                  |
| $K$                | hydraulic conductivity                                                  | $\text{m}^2 \text{MPa}^{-1} \text{h}^{-1}$      | [D9]                                | Green and Corey<br>(1971)        |
| $K_{mat}$          | soil matrix hydraulic conductivity                                      | $\text{m}^2 \text{MPa}^{-1} \text{h}^{-1}$      | [D10]                               |                                  |
| $K_{mac}$          | macropore hydraulic conductivity                                        | $\text{m}^2 \text{MPa}^{-1} \text{h}^{-1}$      | [D10a]                              |                                  |
| $K'_x, K'_y, K'_z$ | hydraulic conductance in $x$ , $y$ or $z$ directions                    | $\text{m MPa}^{-1} \text{h}^{-1}$               | [D7,D9]                             |                                  |
| $\kappa$           | thermal conductivity                                                    | $\text{MJ m}^{-1} \text{h}^{-1} \text{°C}^{-1}$ | [D12]                               | de Vries (1963)                  |
| $L_t$              | distance from boundary to external water table in $x$ or $y$ directions | $\text{m}$                                      | [D10]                               |                                  |
| $L_x, L_y, L_z$    | length of landscape element in $x$ , $y$ or $z$ directions              | $\text{m}$                                      | [D1,D5b,D8,D9,D10,D12,D15a,D16,D19] |                                  |
| $LE_l$             | latent heat flux from surface litter                                    |                                                 | [D6a]                               | $\text{MJ m}^{-2} \text{h}^{-1}$ |
| $LE_s$             | latent heat flux from soil surface                                      |                                                 | [D6b]                               | $\text{MJ m}^{-2} \text{h}^{-1}$ |
| $L$                | latent heat of evaporation                                              | $\text{MJ m}^{-3}$                              | [D6,D11,D13]                        | 2460                             |
| $M_\gamma$         | atomic mass of gas $\gamma$                                             | $\text{g mol}^{-1}$                             | [D18]                               |                                  |

|                  |                                                                                                             |                                          |                 |
|------------------|-------------------------------------------------------------------------------------------------------------|------------------------------------------|-----------------|
| $P$              | precipitation flux                                                                                          | $\text{m}^3 \text{m}^{-2} \text{h}^{-1}$ | [D4]            |
| $Q_{b\gamma z}$  | bubbling flux                                                                                               | $\text{g m}^{-2} \text{h}^{-1}$          | [D18]           |
| $Q_{dry}$        | volatilization – dissolution of gas $\gamma$ between aqueous and gaseous phases in roots                    | $\text{g m}^{-2} \text{h}^{-1}$          | [D14b]          |
| $Q_{ds\gamma}$   | volatilization – dissolution of gas $\gamma$ between aqueous and gaseous phases in soil                     | $\text{g m}^{-2} \text{h}^{-1}$          | [D14a,D15b]     |
| $Q_f$            | freeze-thaw flux (thaw +ve)                                                                                 | $\text{m}^3 \text{m}^{-2} \text{h}^{-1}$ | [D8,D13]        |
| $Q_{gr\gamma}$   | gaseous flux of gas $\gamma$ between roots and the atmosphere                                               | $\text{g m}^{-2} \text{h}^{-1}$          | [D16d]          |
| $Q_{gs\gamma}$   | gaseous flux of gas $\gamma$ in soil                                                                        | $\text{g m}^{-2} \text{h}^{-1}$          | [D15a,D16a,b,c] |
| $Q_{tx}, Q_{ty}$ | surface water flow in $x$ or $y$ directions                                                                 | $\text{m}^3 \text{m}^{-2} \text{h}^{-1}$ | [D1,D4]         |
| $Q_{s\gamma}$    | aqueous flux of gas or solute $\gamma$                                                                      | $\text{g m}^{-2} \text{h}^{-1}$          | [D19]           |
| $Q_{mat_t}$      | water flux between boundary grid cell and external water table through soil matrix in $x$ or $y$ directions | $\text{m}^3 \text{m}^{-2} \text{h}^{-1}$ | [D10]           |
| $Q_{mac_t}$      | water flux between boundary grid cell and external water table through macropores in $x$ or $y$ directions  | $\text{m}^3 \text{m}^{-2} \text{h}^{-1}$ | [D10a]          |

|                          |                                                            |                     |                            |                                        |                               |
|--------------------------|------------------------------------------------------------|---------------------|----------------------------|----------------------------------------|-------------------------------|
| $Q_{wx}, Q_{wy}, Q_{wz}$ | subsurface water flow in $x$ , $y$ or $z$ directions       | $m^3 m^{-2} h^{-1}$ | [D4,D7,D8,D12,D16,D19,D20] |                                        |                               |
| $\theta_g$               | air-filled porosity                                        | $m^3 m^{-3}$        | [D17a,b,c]                 |                                        |                               |
| $\theta_{mac}$           | macropore water content                                    | $m^3 m^{-3}$        | [D10a]                     |                                        |                               |
| $\theta_{pr}$            | root porosity                                              | $m^3 m^{-3}$        | [D17d]                     | dryland spp. 0.10<br>wetland spp. 0.20 | Luxmoore et al.<br>(1970a, b) |
| $\theta_{ps}$            | soil porosity                                              | $m^3 m^{-3}$        | [D17a,b,c]                 |                                        |                               |
| $\theta_w$               | water-filled porosity                                      | $m^3 m^{-3}$        | [D8,D18,D20]               |                                        |                               |
| $R$                      | ratio of cross-sectional area to perimeter of surface flow | $m$                 | [D3,D5a]                   |                                        |                               |
| $R_n$                    | net radiation                                              | $MJ m^{-2} h^{-1}$  | [D11]                      |                                        |                               |
| $r_{al}$                 | surface litter boundary layer resistance                   | $m h^{-1}$          | [D6a]                      |                                        |                               |
| $r_{as}$                 | Soil surface boundary layer resistance                     | $m h^{-1}$          | [D6b]                      |                                        |                               |
| $S'_\gamma$              | Ostwald solubility coefficient of gas $\gamma$ at 30 °C    | -                   | [D14,D15b,D18]             | 0.0293 for $\gamma = O_2$              | Wilhelm et al.<br>(1977)      |
| $s_r$                    | slope of channel sides during surface flow                 | $m m^{-1}$          | [D5a]                      |                                        |                               |
| $s_x, s_y$               | slope in $x$ or $y$ directions                             | $m m^{-1}$          | [D3,D5b]                   |                                        |                               |

|            |                                                   |                             |           |                       |
|------------|---------------------------------------------------|-----------------------------|-----------|-----------------------|
| $T$        | soil temperature                                  | °C                          | [D12,D18] |                       |
| $\tau$     | Tortuosity                                        | -                           | [D20]     |                       |
| $v_x, v_y$ | velocity of surface flow in $x$ or $y$ directions | $\text{m h}^{-1}$           | [D1,D3]   |                       |
| $\psi'$    | soil water potential at saturation                | MPa                         | [D10]     | $-2.0 \times 10^{-2}$ |
| $\psi_s$   | soil water potential                              | MPa                         | [D7,D10]  |                       |
| $Z$        | surface elevation                                 | m                           | [D5b]     |                       |
| $z_r$      | Manning's roughness coefficient                   | $\text{m}^{-1/3} \text{ h}$ | [D3]      | 0.01                  |

## Appendix E: Solute transformations

### Precipitation-dissolution equilibria

|                                                                            |                                |       |                    |
|----------------------------------------------------------------------------|--------------------------------|-------|--------------------|
| $\text{Al(OH)}_{3(s)} \Leftrightarrow (\text{Al}^{3+}) + 3 (\text{OH}^-)$  | (amorphous $\text{Al(OH)}_3$ ) | -33.0 | [E.1] <sup>1</sup> |
| $\text{Fe(OH)}_{3(s)} \Leftrightarrow (\text{Fe}^{3+}) + 3 (\text{OH}^-)$  | (soil Fe)                      | -39.3 | [E.2]              |
| $\text{CaCO}_{3(s)} \Leftrightarrow (\text{Ca}^{2+}) + (\text{CO}_3^{2-})$ | (calcite)                      | -9.28 | [E.3]              |
| $\text{CaSO}_{4(s)} \Leftrightarrow (\text{Ca}^{2+}) + (\text{SO}_4^{2-})$ | (gypsum)                       | -4.64 | [E.4]              |
| $\text{AlPO}_{4(s)} \Leftrightarrow (\text{Al}^{3+}) + (\text{PO}_4^{3-})$ | (variscite)                    | -22.1 | [E.5] <sup>2</sup> |

<sup>1</sup> Round brackets denote solute activity. Numbers in italics denote  $\log K$  (precipitation-dissolution, ion pairs), Gapon coefficient (cation exchange) or  $\log c$  (anion exchange).

<sup>2</sup> All equilibrium reactions involving N and P are calculated for both band and non-band volumes if a banded fertilizer application has been made. These volumes are calculated dynamically from diffusive transport of soluble N and P.



|                                                                                                                       |                         |       |                    |
|-----------------------------------------------------------------------------------------------------------------------|-------------------------|-------|--------------------|
| $\text{FePO}_{4(s)} \Leftrightarrow (\text{Fe}^{3+}) + (\text{PO}_4^{3-})$                                            | (strengite)             | -26.4 | [E.6]              |
| $\text{Ca}(\text{H}_2\text{PO}_4)_{2(s)} \Leftrightarrow (\text{Ca}^{2+}) + 2 (\text{H}_2\text{PO}_4^-)$              | (monocalcium phosphate) | -1.15 | [E.7] <sup>3</sup> |
| $\text{CaHPO}_{4(s)} \Leftrightarrow (\text{Ca}^{2+}) + (\text{HPO}_4^{2-})$                                          | (monetite)              | -6.92 | [E.8]              |
| $\text{Ca}_5(\text{PO}_4)_3\text{OH}_{(s)} \Leftrightarrow 5 (\text{Ca}^{2+}) + 3 (\text{PO}_4^{3-}) + (\text{OH}^-)$ | (hydroxyapatite)        | -58.2 | [E.9]              |

#### **Cation exchange equilibria**<sup>4</sup>

|                                                                                         |  |      |        |
|-----------------------------------------------------------------------------------------|--|------|--------|
| $\text{X-Ca} + 2 (\text{NH}_4^+) \Leftrightarrow 2 \text{X-NH}_4 + (\text{Ca}^{2+})$    |  | 1.00 | [E.10] |
| $3 \text{X-Ca} + 2 (\text{Al}^{3+}) \Leftrightarrow 2 \text{X-Al} + 3 (\text{Ca}^{2+})$ |  | 1.00 | [E.11] |
| $\text{X-Ca} + (\text{Mg}^{2+}) \Leftrightarrow \text{X-Mg} + (\text{Ca}^{2+})$         |  | 0.60 | [E.12] |
| $\text{X-Ca} + 2 (\text{Na}^+) \Leftrightarrow 2 \text{X-Na} + (\text{Ca}^{2+})$        |  | 0.16 | [E.13] |
| $\text{X-Ca} + 2 (\text{K}^+) \Leftrightarrow 2 \text{X-K} + (\text{Ca}^{2+})$          |  | 3.00 | [E.14] |
| $\text{X-Ca} + 2 (\text{H}^+) \Leftrightarrow 2 \text{X-H} + (\text{Ca}^{2+})$          |  | 1.00 | [E.15] |

#### **Anion adsorption equilibria**

|                                                              |  |       |        |
|--------------------------------------------------------------|--|-------|--------|
| $\text{X-OH}_2^+ \Leftrightarrow \text{X-OH} + (\text{H}^+)$ |  | -7.35 | [E.16] |
| $\text{X-OH} \Leftrightarrow \text{X-O}^- + (\text{H}^+)$    |  | -8.95 | [E.17] |

<sup>3</sup> May only be entered as fertilizer, not considered to be naturally present in soils.

<sup>4</sup> X- denotes surface exchange site for cation or anion adsorption.

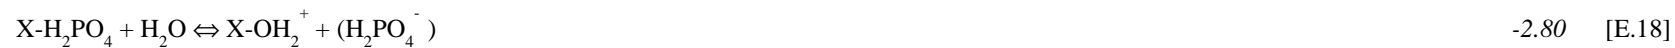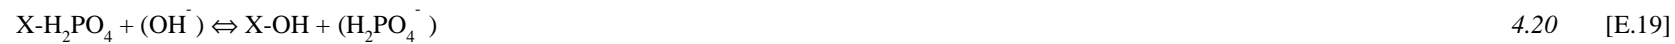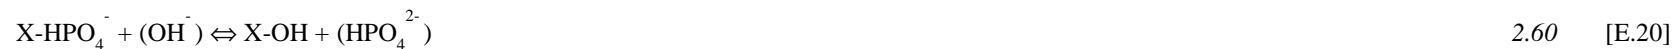

### Organic acid equilibria

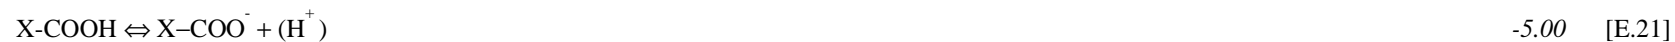

### Ion pair equilibria

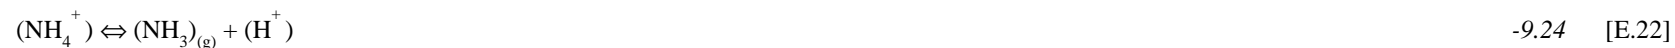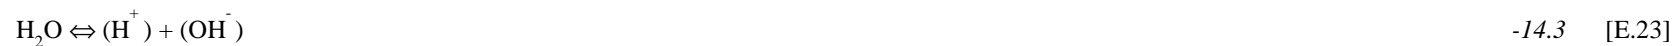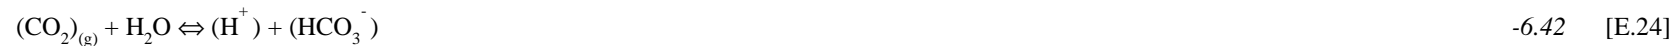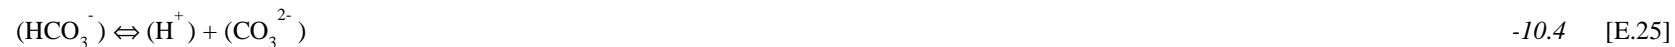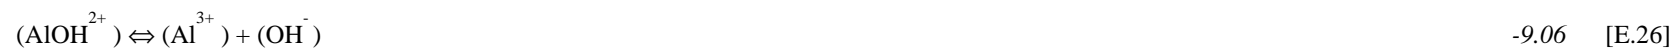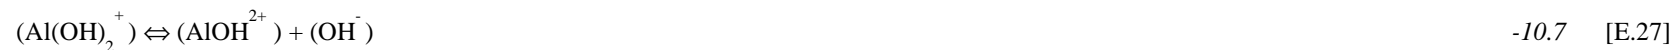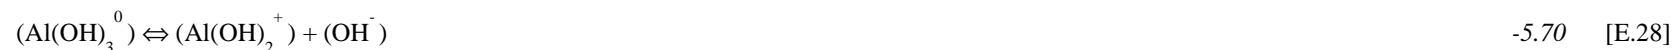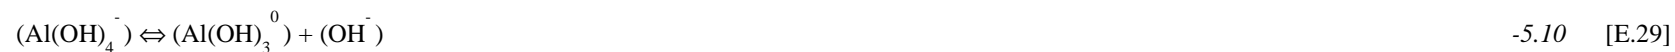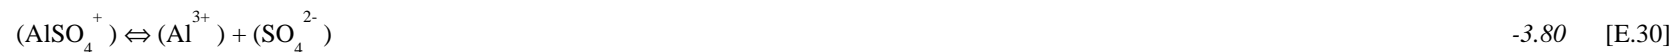

|                                                                                             |       |        |
|---------------------------------------------------------------------------------------------|-------|--------|
| $(\text{FeOH}^{2+}) \Leftrightarrow (\text{Fe}^{3+}) + (\text{OH}^{-})$                     | -12.1 | [E.31] |
| $(\text{Fe}(\text{OH})_2^{+}) \Leftrightarrow (\text{FeOH}^{2+}) + (\text{OH}^{-})$         | -10.8 | [E.32] |
| $(\text{Fe}(\text{OH})_3^0) \Leftrightarrow (\text{Fe}(\text{OH})_2^{+}) + (\text{OH}^{-})$ | -6.94 | [E.33] |
| $(\text{Fe}(\text{OH})_4^{-}) \Leftrightarrow (\text{Fe}(\text{OH})_3^0) + (\text{OH}^{-})$ | -5.84 | [E.34] |
| $(\text{FeSO}_4^{+}) \Leftrightarrow (\text{Fe}^{3+}) + (\text{SO}_4^{2-})$                 | -4.15 | [E.35] |
| $(\text{CaOH}^{+}) \Leftrightarrow (\text{Ca}^{2+}) + (\text{OH}^{-})$                      | -1.90 | [E.36] |
| $(\text{CaCO}_3^0) \Leftrightarrow (\text{Ca}^{2+}) + (\text{CO}_3^{2-})$                   | -4.38 | [E.37] |
| $(\text{CaHCO}_3^{+}) \Leftrightarrow (\text{Ca}^{2+}) + (\text{HCO}_3^{-})$                | -1.87 | [E.38] |
| $(\text{CaSO}_4^0) \Leftrightarrow (\text{Ca}^{2+}) + (\text{SO}_4^{2-})$                   | -2.92 | [E.39] |
| $(\text{MgOH}^{+}) \Leftrightarrow (\text{Mg}^{2+}) + (\text{OH}^{-})$                      | -3.15 | [E.40] |
| $(\text{MgCO}_3^0) \Leftrightarrow (\text{Mg}^{2+}) + (\text{CO}_3^{2-})$                   | -3.52 | [E.41] |
| $(\text{MgHCO}_3^{+}) \Leftrightarrow (\text{Mg}^{2+}) + (\text{HCO}_3^{-})$                | -1.17 | [E.42] |
| $(\text{MgSO}_4^0) \Leftrightarrow (\text{Mg}^{2+}) + (\text{SO}_4^{2-})$                   | -2.68 | [E.43] |
| $(\text{NaCO}_3^{-}) \Leftrightarrow (\text{Na}^{+}) + (\text{CO}_3^{2-})$                  | -3.35 | [E.44] |
| $(\text{NaSO}_4^{-}) \Leftrightarrow (\text{Na}^{+}) + (\text{SO}_4^{2-})$                  | -0.48 | [E.45] |

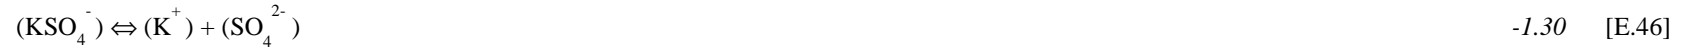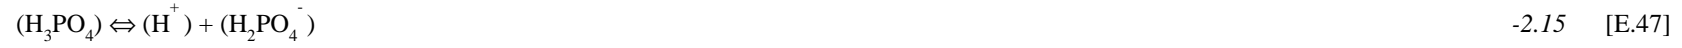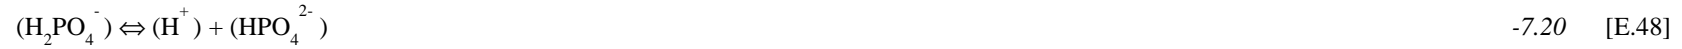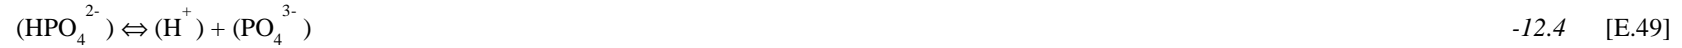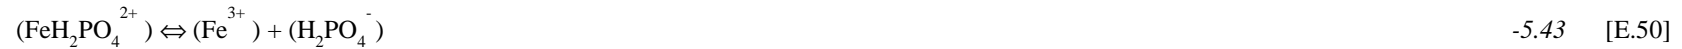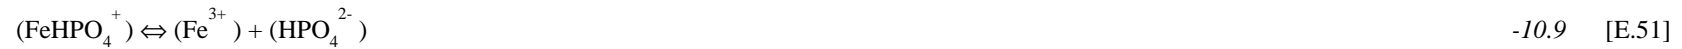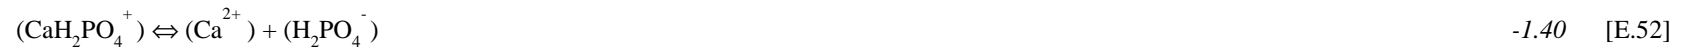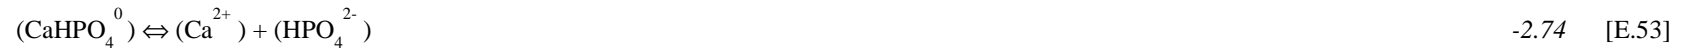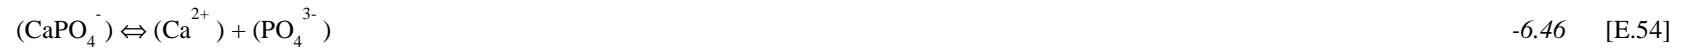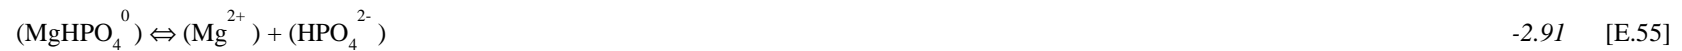

## Appendix F: Symbiotic N<sub>2</sub> fixation

### Rhizobial growth

$$R_{\text{max},i,l} = M_{\text{ni},l} R' [\chi_{\text{ni},l}] / ([\chi_{\text{ni},l}] + K_{\chi_{\text{ni}}}) f_i f_{\text{NP}} \quad \text{respiration demand} \quad [\text{F1}]$$

$$f_i = T_i \{ \exp[B - H_a / (RT_i)] \} / \{ 1 + \exp[(H_{\text{dl}} - ST_i) / (RT_i)] + \exp[(ST_i - H_{\text{dh}}) / (RT_i)] \} \quad \text{Arrhenius function} \quad [\text{F2}]$$

$$f_{\text{NP}} = \min\{ [N_{\text{ni},l}] / [N_{\text{n}}'], [P_{\text{ni},l}] / [P_{\text{n}}'] \} \quad \text{N or P limitation} \quad [\text{F3}]$$

|                                                                                                                       |                                                  |                                        |
|-----------------------------------------------------------------------------------------------------------------------|--------------------------------------------------|----------------------------------------|
| $R_{i,l} = R_{\max,i,l} (V_{O_2i,l}/V_{O_2\max,i,l})$                                                                 | O <sub>2</sub> limitation                        | [F4]                                   |
| $V_{O_2\max,i,l} = 2.67 R_{\max,i,l}$                                                                                 | O <sub>2</sub> demand                            | [F5]                                   |
| $V_{O_2i,l} = V_{O_2\max,i,l} [O_{2r,i,l}]/([O_{2r,i,l}] + K_{O_2r})$                                                 | equilibrate O <sub>2</sub> uptake with           | [F6a]                                  |
| $= 2\pi L_{r,i,l} D_{sO_2} ([O_{2l}] - [O_{2r,i,l}])/\ln((r_{r,i,l} + r_{w,l})/r_{r,i,l})$                            | supply                                           | [F6b]                                  |
| $R_{m,i,l} = \mathbf{R}_m N_{n,i,l} f_{tm}$                                                                           | maintenance respiration                          | [F7]                                   |
| $f_{tm} = e^{[y(T_l - 298.16)]}$                                                                                      | temperature function                             | [F8]                                   |
| $R_{g,i,l} = \max\{0.0, R_{i,l} - R_{m,i,l}\}$                                                                        | growth + fixation respiration                    | [F9]                                   |
| $R_{s,i,l} = \max\{0.0, R_{m,i,l} - R_{i,l}\}$                                                                        | microbial senescence                             | [F10]                                  |
| $L_{C,i,l} = R_{s,i,l} \min\{M_{n,i,l}/(2.5N_{n,i,l}), M_{n,i,l}/(25.0P_{n,i,l})\}$                                   | microbial C litterfall                           | [F11]                                  |
| <b>N<sub>2</sub> fixation</b>                                                                                         |                                                  |                                        |
| $V_{N_2i,l} = \min\{R_{g,i,l} E_{N_2}' f_{CP}, M_{n,i,l} [N_n'] - N_{n,i,l}\} [N_{2r,i,l}]/([N_{2r,i,l}] + K_{N_2r})$ | rate of N <sub>2</sub> fixation                  | [F12]                                  |
| $f_{CP} = \min\{[\chi_{n,i,l}]/(1.0 + [v_{n,i,l}]/K_{I\chi_n}), [\tau_{n,i,l}]/(1.0 + [v_{n,i,l}]/K_{I\tau_n})\}$     | product inhibition of N <sub>2</sub><br>fixation | [F13]                                  |
| $R_{N_2i,l} = V_{N_2i,l}/E_{N_2}'$                                                                                    | fixation respiration                             | [F14]                                  |
| $U_{\chi,i,l} = (R_{g,i,l} - R_{N_2i,l})/(1 - Y_n')$                                                                  | growth respiration                               | [F15]                                  |
| $\delta M_{n,i,l}/\delta t = U_{i,l} Y_n' - L_{C,i,l}$                                                                | microbial C growth                               | [F16]                                  |
| $\delta N_{n,i,l}/\delta t = \delta M_{n,i,l}/\delta t \min\{v_{n,i,l}/\chi_{n,i,l}, [N_n']\}$                        | microbial N growth                               | $\delta M_{n,i,l}/\delta t > 0$ [F17a] |

|                                                                                              |                        |                                 |        |
|----------------------------------------------------------------------------------------------|------------------------|---------------------------------|--------|
| $\delta N_{ni,l}/\delta t = N_{ni,l}/M_{ni,l} \delta M_{ni,l}/\delta t$                      | microbial N growth     | $\delta M_{ndi,l}/\delta t < 0$ | [F17b] |
| $\delta P_{ni,l}/\delta t = \delta M_{ni,l}/\delta t \min\{\pi_{ni,l}/\chi_{ni,l}, [P_n']\}$ | microbial P growth     | $\delta M_{ndi,l}/\delta t > 0$ | [F18a] |
| $\delta P_{ni,l}/\delta t = P_{ni,l}/M_{ni,l} \delta M_{ni,l}/\delta t$                      | microbial P growth     | $\delta M_{ndi,l}/\delta t < 0$ | [F18b] |
| $L_{Ni,l} = \text{abs}(\delta N_{ni,l}/\delta t)$                                            | microbial N litterfall | $\delta N_{ndi,l}/\delta t < 0$ | [F19]  |
| $L_{Pi,l} = \text{abs}(\delta P_{ni,l}/\delta t)$                                            | microbial P litterfall | $\delta P_{ndi,l}/\delta t < 0$ | [F20]  |

### Nodule-root exchange

|                                                                                                                     |                        |       |
|---------------------------------------------------------------------------------------------------------------------|------------------------|-------|
| $V_{\chi,l} = \kappa (\chi_{vi,l} M_{ni,l} - \chi_{ni,l} M_{vi,l}) / (M_{ni,l} + M_{vi,l})$                         | nodule-root C exchange | [F21] |
| $V_{vi,l} = \kappa (V_{vi,l} \chi_{ni,l} - V_{ni,l} \chi_{vi,l}) / (\chi_{ni,l} + \chi_{vi,l})$                     | nodule-root N exchange | [F22] |
| $V_{\pi,l} = \kappa (\pi_{vi,l} \chi_{ni,l} - \pi_{ni,l} \chi_{vi,l}) / (\chi_{ni,l} + \chi_{vi,l})$                | nodule-root P exchange | [F23] |
| $\delta \chi_{ni,l}/\delta t = V_{\chi,l} - \min\{R_{mi,l}, R_{i,l}\} - R_{N2i,l} - U_{\chi,l} + F_{LC,l} L_{Ci,l}$ | nodule nonstructural C | [F24] |
| $\delta V_{ni,l}/\delta t = V_{vi,l} - \delta N_{ni,l}/\delta t + V_{N2i,l} + F_{LN,l} L_{Ni,l}$                    | nodule nonstructural N | [F25] |
| $\delta \pi_{ni,l}/\delta t = V_{\pi,l} - \delta P_{ni,l}/\delta t + F_{LP,l} L_{Pi,l}$                             | nodule nonstructural P | [F26] |

### Definition of variables in appendix F

| Variable | Definition                                          | Units | Equations | Input Values | Reference |
|----------|-----------------------------------------------------|-------|-----------|--------------|-----------|
| $B$      | parameter such that $f_i = 1.0$ at $T_i = 298.15$ K |       | F2        | 17.533       |           |

|                 |                                                                 |                            |                           |      |                                        |
|-----------------|-----------------------------------------------------------------|----------------------------|---------------------------|------|----------------------------------------|
| $\chi_{ni,l}$   | nodule nonstructural C                                          | $\text{g m}^{-2}$          | F17a,F18a,F21,F22,B23,B24 |      |                                        |
| $[\chi_{ni,l}]$ | nodule nonstructural C concentration                            | $\text{g g}^{-1}$          | F1,F13                    |      |                                        |
| $\chi_{ri,l}$   | root nonstructural C                                            | $\text{g m}^{-2}$          | F21,F22,F23               |      |                                        |
| $D_{sO_2}$      | diffusivity of aqueous $O_2$                                    | $\text{m}^2 \text{h}^{-1}$ | F6b                       |      |                                        |
| $E_{N_2}'$      | direct energy cost of $N_2$ fixation                            | $\text{g N g C}^{-1}$      | F12,F14                   | 0.25 | Gutschick (1981), Voisin et al. (2003) |
| $F_{LC,l}$      | fraction of nodule C litterfall remobilized as nonstructural C  | -                          | F24                       |      |                                        |
| $F_{LN,l}$      | fraction of nodule N litterfall remobilized as nonstructural N  | -                          | F25                       |      |                                        |
| $F_{LP,l}$      | fraction of nodule P litterfall remobilized as nonstructural P  | -                          | F26                       |      |                                        |
| $f_{CP}$        | effect of nodule nonstructural C or P content on $N_2$ fixation | -                          | F12,F13                   |      |                                        |
| $f_{NP}$        | effect of nodule N or P content on respiration                  | -                          | F1,F3                     |      |                                        |
| $f_t$           | temperature function for nodule respiration                     | -                          | F1,F2                     |      |                                        |
| $f_{tm}$        | temperature function for nodule maintenance respiration         | -                          | F7,F8                     |      |                                        |

|                   |                                                                        |                                   |             |                    |
|-------------------|------------------------------------------------------------------------|-----------------------------------|-------------|--------------------|
| $H_a$             | energy of activation                                                   | $\text{J mol}^{-1}$               | F2          | $57.5 \times 10^3$ |
| $H_{dh}$          | energy of high temperature deactivation                                | $\text{J mol}^{-1}$               | F2          | $220 \times 10^3$  |
| $H_{dl}$          | energy of low temperature deactivation                                 | $\text{J mol}^{-1}$               | F2          | $190 \times 10^3$  |
| $K_{\chi^n}$      | Michaelis-Menten constant for nodule respiration of $\chi_{ndi,l}$     | $\text{g g}^{-1}$                 | F1          | 0.01               |
| $K_{I\chi_n}$     | inhibition constant for nonstructural N:C on $\text{N}_2$ fixation     | $\text{g g}^{-1}$                 | F13         | 10                 |
| $K_{I\pi_n}$      | inhibition constant for nonstructural N:P on $\text{N}_2$ fixation     | $\text{g g}^{-1}$                 | F13         | 1000               |
| $K_{\text{N}_2r}$ | Michaelis-Menten constant for nodule $\text{N}_2$ uptake               | $\text{g N m}^{-3}$               | F12         | 0.14               |
| $K_{\text{O}_2r}$ | Michaelis-Menten constant for nodule $\text{O}_2$ uptake               | $\text{g O m}^{-3}$               | F6a         |                    |
| $\kappa$          | rate constant for nonstructural C,N,P exchange between root and nodule | $\text{h}^{-1}$                   | F21,F22,F23 |                    |
| $L_{ri,l}$        | root length                                                            | $\text{m m}^{-2}$                 | F6b         |                    |
| $L_{Ci,l}$        | nodule C litterfall                                                    | $\text{g C m}^{-2} \text{h}^{-1}$ | F11,F16,F24 |                    |
| $L_{Ni,l}$        | nodule N litterfall                                                    | $\text{g N m}^{-2} \text{h}^{-1}$ | F19,F25     |                    |
| $L_{Pi,l}$        | nodule P litterfall                                                    | $\text{g P m}^{-2} \text{h}^{-1}$ | F20,F26     |                    |



|               |                                                |                       |                                |      |
|---------------|------------------------------------------------|-----------------------|--------------------------------|------|
| $M_{ni,l}$    | nodule structural C                            | $\text{g C m}^{-2}$   | F1,F11,F12,F16<br>,F17,F18,F21 |      |
| $M_{ri,l}$    | root structural C                              | $\text{g C m}^{-2}$   | F21                            |      |
| $[N_n']$      | maximum nodule structural N concentration      | $\text{g N g C}^{-1}$ | F3,F12                         | 0.1  |
| $N_{ni,l}$    | nodule structural N                            | $\text{g N m}^{-2}$   | F7,F11,F12,F17,F<br>19,F25     |      |
| $[N_{ni,l}]$  | nodule structural N concentration              | $\text{g N g C}^{-1}$ | F3,F17a                        |      |
| $[N_{2ri,l}]$ | rhizosphere aqueous $\text{N}_2$ concentration | $\text{g N m}^{-3}$   | F12                            |      |
| $V_{ni,l}$    | nodule nonstructural N                         | $\text{g N m}^{-2}$   | F17a,F22,F25                   |      |
| $V_{ri,l}$    | root nonstructural N                           | $\text{g N m}^{-2}$   | F22                            |      |
| $[V_{ni,l}]$  | nodule concentration of nonstructural N        | $\text{g g}^{-1}$     | F13,F17a                       |      |
| $[O_{2ri,l}]$ | rhizosphere aqueous $\text{O}_2$ concentration | $\text{g O m}^{-3}$   | F6a,b                          |      |
| $[O_{2l}]$    | soil aqueous $\text{O}_2$ concentration        | $\text{g O m}^{-3}$   | F6b                            |      |
| $[P_n']$      | maximum nodule structural P concentration      | $\text{g P g C}^{-1}$ | F3,F18a                        | 0.01 |

|                |                                                                                                                          |                                       |               |        |
|----------------|--------------------------------------------------------------------------------------------------------------------------|---------------------------------------|---------------|--------|
| $P_{ni,l}$     | nodule structural P                                                                                                      | g P m <sup>-2</sup>                   | F18a,F20,F26  |        |
| $[P_{ni,l}]$   | nodule structural P concentration                                                                                        | g P g C <sup>-1</sup>                 | F3,F11        |        |
| $\pi_{ni,l}$   | nodule nonstructural P                                                                                                   | g P m <sup>-2</sup>                   | F18a,F23,F26  |        |
| $\pi_{ri,l}$   | root nonstructural P                                                                                                     | g P m <sup>-2</sup>                   | F23           |        |
| $[\pi_{ni,l}]$ | nodule concentration of nonstructural P                                                                                  | g g <sup>-1</sup>                     | F13           |        |
| $R$            | gas constant                                                                                                             | J mol <sup>-1</sup> K <sup>-1</sup>   | F2            | 8.3143 |
| $R_{gi,l}$     | nodule growth respiration                                                                                                | g C m <sup>-2</sup> h <sup>-1</sup>   | F9,F12,F15    |        |
| $R'$           | specific nodule respiration at 25°C, and non-limiting O <sub>2</sub> ,<br>$\chi_{ndi,l}$ , $V_{ndi,l}$ and $\pi_{ndi,l}$ | h <sup>-1</sup>                       | F1            | 0.125  |
| $R_{i,l}$      | nodule respiration under ambient O <sub>2</sub>                                                                          | g C m <sup>-2</sup> h <sup>-1</sup>   | F4,F9,F10,F24 |        |
| $R_m$          | specific nodule maintenance respiration at 25°C                                                                          | g C g C <sup>-1</sup> h <sup>-1</sup> | F7            |        |
| $R_{maxi,l}$   | nodule respiration under non-limiting O <sub>2</sub>                                                                     | g C m <sup>-2</sup> h <sup>-1</sup>   | F1,F4,F5      |        |
| $R_{mi,l}$     | nodule maintenance respiration                                                                                           | g C m <sup>-2</sup> h <sup>-1</sup>   | F7,F9,F10,F24 |        |
| $R_{N_2i,l}$   | nodule respiration for N <sub>2</sub> fixation                                                                           | g C m <sup>-2</sup> h <sup>-1</sup>   | F14,F15,F24   |        |

|                       |                                                                |                                    |             |       |
|-----------------------|----------------------------------------------------------------|------------------------------------|-------------|-------|
| $R_{si,l}$            | nodule senescence respiration                                  | $\text{g C m}^{-2} \text{ h}^{-1}$ | F9,F11      |       |
| $r_{ri,l}$            | root radius                                                    | m                                  | F6b         |       |
| $r_{wl}$              | radius of soil water films                                     | m                                  | F6b         |       |
| $S$                   | change in entropy                                              | $\text{J mol}^{-1} \text{ K}^{-1}$ | F2          | 710   |
| $T_l$                 | soil temperature                                               | K                                  | F2,F8       |       |
| $U_{\chi,l}$          | uptake of nodule nonstructural C for growth                    | $\text{g C m}^{-2} \text{ h}^{-1}$ | F15,F16,F24 |       |
| $V_{\chi,l}$          | nonstructural C transfer between root and nodule               | $\text{g C m}^{-2} \text{ h}^{-1}$ | F21,F24     |       |
| $V_{vi,l}$            | nonstructural N transfer between root and nodule               | $\text{g N m}^{-2} \text{ h}^{-1}$ | F22,F25     |       |
| $V_{N_2,l}$           | $\text{N}_2$ fixation                                          | $\text{g N m}^{-2} \text{ h}^{-1}$ | F12,F14,F25 |       |
| $V_{O_2\text{max},l}$ | $\text{O}_2$ uptake by nodules under non-limiting $\text{O}_2$ | $\text{g O m}^{-2} \text{ h}^{-1}$ | F4,F5,F6a   |       |
| $V_{O_2,l}$           | $\text{O}_2$ uptake by nodules under ambient $\text{O}_2$      | $\text{g O m}^{-2} \text{ h}^{-1}$ | F4,F6       |       |
| $V_{\bar{n},l}$       | nonstructural P transfer between root and nodule               | $\text{g P m}^{-2} \text{ h}^{-1}$ | F23,F26     |       |
| $Y_n'$                | nodule growth yield                                            | $\text{g C g C}^{-1}$              | F15,F16     | 0.67  |
| $y$                   | shape parameter for $f_{tm}$                                   | -                                  | F8          | 0.081 |

## Appendix G: CH<sub>4</sub> production and consumption

### Anaerobic fermenters and H<sub>2</sub> producing acetogens

|                                                                                                                                   |                                    |                         |       |
|-----------------------------------------------------------------------------------------------------------------------------------|------------------------------------|-------------------------|-------|
| $R_{i,f} = \{R'_{f} M_{i,f,a} [\text{DOC}_{i,c}] / (\mathbf{K}_f ((1 + [\text{O}_2] / \mathbf{K}_i) + [\text{DOC}_{i,c}]))\} f_t$ | respiration by fermenters          |                         | [G1]  |
| $\text{DOC}_{i,c} \rightarrow 0.67 \text{ A}_{i,c} + 0.33 \text{ CO}_2\text{-C} + 0.11 \text{ H}_2$                               | partition respiration products     |                         | [G2]  |
| $U_{i,f,c} = R_{m,i,f} + (R_{i,f} - R_{m,i,f})(1.0 + Y_f)$                                                                        | uptake by fermenters               | $[R_{i,f} > R_{m,i,f}]$ | [G3a] |
| $U_{i,f,c} = R_{i,f}$                                                                                                             |                                    | $[R_{i,f} < R_{m,i,f}]$ | [G3b] |
| $Y_f = -\Delta G_f / \mathbf{E}_M$                                                                                                | growth yield of fermentation       |                         | [G4]  |
| $\Delta G_f = \Delta \mathbf{G}'_f + \{RT \ln([\text{H}_2] / [\text{H}_2']^4)\}$                                                  | free energy change of fermentation |                         | [G5]  |
| $\delta M_{i,f,j,c} / \delta t = F_j U_{i,f,c} - F_j R_{i,f} - D_{i,f,j,c}$                                                       | growth of fermenters               | $[R_{i,f} > R_{m,i,f}]$ | [G6a] |
| $\delta M_{i,f,j,c} / \delta t = F_j U_{i,f,c} - R_{m,i,f,j} - D_{i,f,j,c}$                                                       |                                    | $[R_{i,f} < R_{m,i,f}]$ | [G6b] |

### Acetotrophic methanogens

|                                                                                           |                                            |                         |       |
|-------------------------------------------------------------------------------------------|--------------------------------------------|-------------------------|-------|
| $R_{i,m} = \{R'_{m} M_{i,m,a} [\text{A}_{i,c}] / (\mathbf{K}_m + [\text{A}_{i,c}])\} f_t$ | respiration by acetotrophic<br>methanogens |                         | [G7]  |
| $\text{A}_{i,c} \rightarrow 0.50 \text{ CH}_4\text{-C} + 0.50 \text{ CO}_2\text{-C}$      | partition respiration products             |                         | [G8]  |
| $U_{i,m,c} = R_{m,i,m} + (R_{i,m} - R_{m,i,m})(1.0 + Y_m)$                                | uptake by acetotrophic<br>methanogens      | $[R_{i,m} > R_{m,i,m}]$ | [G9a] |

$$U_{i,m,c} = R_{i,m} \quad [R_{i,m} < R_{mi,m}] \quad [G9b]$$

$$-Y_m = -\Delta G'_m / E_M \quad \text{growth yield of acetotrophic} \quad [G10]$$

methanogenesis

$$\delta M_{i,m,j,c} / \delta t = F_j U_{i,m,c} - F_j R_{i,m} - D_{i,m,j,c} \quad \text{growth of acetotrophic} \quad [R_{i,m} > R_{mi,m}] \quad [G11a]$$

methanogens

$$\delta M_{i,m,j,c} / \delta t = F_j U_{i,m,c} - R_{mi,m,j} - D_{i,m,j,c} \quad [R_{i,m} < R_{mi,m}] \quad [G11b]$$

### Hydrogenotrophic methanogens

$$R_h = \{R'_h M_{h,a} [H_2] / (K_h + [H_2]) [CO_2] / (K_c + [CO_2])\} f_t \quad \text{respiration by hydrogenotrophic} \quad [G12]$$

methanogens

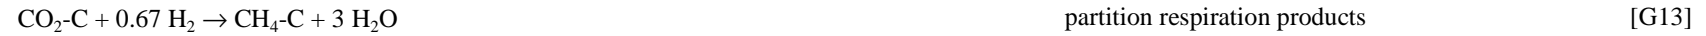

$$U_{h,c} = R_{mh} + (R_h - R_{mh})(1.0 + Y_h) \quad \text{uptake by hydrogenotrophic} \quad [R_h > R_{mh}] \quad [G14a]$$

methanogens

$$U_{h,c} = R_h \quad [R_h < R_{mh}] \quad [G14b]$$

$$Y_h = -\Delta G_h / E_C \quad \text{growth yield of hydrogenotrophic} \quad [G15]$$

methanogenesis

$$\Delta G_h = \Delta G'_h - \{RT \ln([H_2] / [H_2']^4)\} \quad \text{free energy change of} \quad [G16]$$

hydrogenotrophic methanogenesis

$$\delta M_{h,j,c}/\delta t = F_j U_{h,c} - F_j R_h - D_{h,j,c}$$

growth of hydrogenotrophic  
methanogens [R<sub>h</sub> > R<sub>mh</sub>] [G17a]

$$\delta M_{h,j,c}/\delta t = F_j U_{h,c} - R_{mh,j} - D_{h,j,c}$$

[R<sub>h</sub> < R<sub>mh</sub>] [G17b]

### Autotrophic methanotrophs

$$X'_t = \{X'_t M_{t,a} [\text{CH}_4]/(K_t + [\text{CH}_4])\} f_t$$

CH<sub>4</sub> oxidation by methanotrophs [G18]  
under non-limiting O<sub>2</sub>

$$R'_t = X'_t Y_{tR}$$

respiration by methanotrophs under [G19]  
non-limiting O<sub>2</sub>

$$Y_{tR} = -\Delta G'_t / E_G$$

energy yield from CH<sub>4</sub> oxidation [G20]

$$X_t = X'_t f_{O_2t}$$

CH<sub>4</sub> oxidation by methanotrophs [G21 a]  
under ambient O<sub>2</sub>

$$R_t = R'_t f_{O_2t}$$

respiration by methanotrophs under [G21 b]  
ambient O<sub>2</sub>

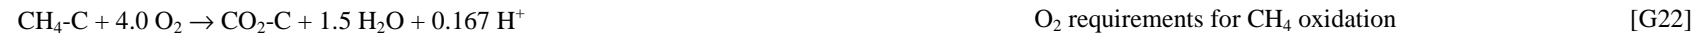

O<sub>2</sub> requirements for CH<sub>4</sub> oxidation [G22]  
by methanotrophs

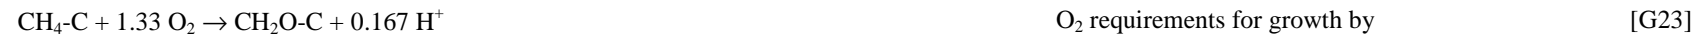

O<sub>2</sub> requirements for growth by [G23]  
methanotrophs

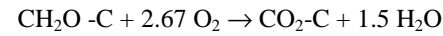

O<sub>2</sub> requirements for respiration by [G24]

methanotrophs

$$U_{t,c} = R_{mt} + (R_t - R_{mt})(1.0 + Y_{tG})$$

uptake by methanotrophs [R<sub>t</sub> > R<sub>mt</sub>] [G25a]

$$U_{t,c} = R_t$$

[R<sub>t</sub> < R<sub>mt</sub>] [G25b]

$$Y_{tG} = -\Delta G'_c / E_M$$

growth yield of methanotrophy [G26]

$$\delta M_{t,j,c} / \delta t = F_j U_{t,c} - F_j R_t - D_{t,j,c}$$

[R<sub>t</sub> > R<sub>mt</sub>] [G27a]

$$\delta M_{t,j,c} / \delta t = F_j U_{t,c} - R_{mt,j} - D_{t,j,c}$$

[R<sub>t</sub> < R<sub>mt</sub>] [G27b]

### Definition of variables in appendix G

| Variable                 | Definition                                                         | Units                               | Equations | Input Values | Reference |
|--------------------------|--------------------------------------------------------------------|-------------------------------------|-----------|--------------|-----------|
| A                        | acetate                                                            | g C m <sup>-2</sup>                 | [G2]      |              |           |
| [A]                      | aqueous concentration of acetate                                   | g C m <sup>-3</sup>                 | [G7]      |              |           |
| <i>a</i>                 | descriptor for <i>j</i> = active component of <i>M<sub>i</sub></i> |                                     |           |              |           |
| [CH <sub>4</sub> ]       | aqueous concentration of CH <sub>4</sub>                           | g C m <sup>-3</sup>                 | [G18]     |              |           |
| [CO <sub>2</sub> ]       | aqueous concentration of CO <sub>2</sub>                           | g C m <sup>-3</sup>                 | [G12]     |              |           |
| <i>D<sub>h,j,c</sub></i> | decomposition of hydrogenotrophic methanogens                      | g C m <sup>-2</sup> h <sup>-1</sup> | [G17]     |              |           |

|               |                                                                                      |                                    |                  |       |                                |
|---------------|--------------------------------------------------------------------------------------|------------------------------------|------------------|-------|--------------------------------|
| $D_{i,f,j,c}$ | decomposition of fermenters and acetogens                                            | $\text{g C m}^{-2} \text{ h}^{-1}$ | [G6]             |       |                                |
| $D_{i,m,j,c}$ | decomposition of acetotrophic methanogens                                            | $\text{g C m}^{-2} \text{ h}^{-1}$ | [G11]            |       |                                |
| $D_{t,j,c}$   | decomposition of autotrophic methanotrophs                                           | $\text{g C m}^{-2} \text{ h}^{-1}$ | [G27]            |       |                                |
| $E_C$         | energy required to construct new M from $\text{CO}_2$                                | $\text{kJ g C}^{-1}$               | [G15]            | 75    |                                |
| $E_G$         | energy required to transform $\text{CH}_4$ into organic C                            | $\text{kJ g C}^{-1}$               | [G20]            | 23.5  | Anthony<br>(1982)              |
| $E_M$         | energy required to construct new M from organic C                                    | $\text{kJ g C}^{-1}$               | [G4,G10,G26]     | 25    |                                |
| $F_j$         | partitioning coefficient for $j$ in $M_{i,n,j}$                                      |                                    | [G6,G11,G17,G27] |       |                                |
| $f$           | descriptor for fermenters and acetogens in each $M_i$                                |                                    |                  |       |                                |
| $f_{o_2t}$    | ratio of $\text{O}_2$ uptake to $\text{O}_2$ requirement for $\text{CH}_4$ oxidation |                                    | [G21a,b]         |       |                                |
| $f_t$         | temperature function for growth-related processes<br>(dimensionless)                 |                                    | [G1,G7,G12]      |       |                                |
| $\Delta G'_c$ | free energy change of C oxidation- $\text{O}_2$ reduction                            | $\text{kJ g C}^{-1}$               | [G26]            | -37.5 | Brock and<br>Madigan<br>(1991) |



|               |                                                                                           |                                          |           |       |                                         |
|---------------|-------------------------------------------------------------------------------------------|------------------------------------------|-----------|-------|-----------------------------------------|
| $\Delta G_f$  | free energy change of fermentation plus acetogenesis                                      | $\text{kJ g } P_{i,c}^{-1}$              | [G4,G5]   |       |                                         |
| $\Delta G'_f$ | $\Delta G_f$ when $[\text{H}_2] = [\text{H}_2']$                                          | $\text{kJ g } P_{i,c}^{-1}$              | [G5]      | -4.43 | Brock and Madigan (1991), Schink (1997) |
| $\Delta G_h$  | free energy change of hydrogenotrophic methanogenesis                                     | $\text{kJ g } \text{CO}_2\text{-C}^{-1}$ | [G15,G16] |       |                                         |
| $\Delta G'_h$ | free energy change of hydrogenotrophic methanogenesis when $[\text{H}_2] = [\text{H}_2']$ | $\text{kJ g } \text{CO}_2\text{-C}^{-1}$ | [G16]     | -0.27 | Brock and Madigan (1991)                |
| $\Delta G'_m$ | free energy change of acetotrophic methanogenesis                                         | $\text{kJ g } A_{i,c}^{-1}$              | [G10]     | -1.03 | Brock and Madigan (1991), Schink (1997) |
| $\Delta G'_t$ | free energy change of $\text{CH}_4$ oxidation by methanotrophs                            | $\text{kJ g } \text{CH}_4\text{-C}^{-1}$ | [G20]     | -9.45 | Brock and Madigan (1991)                |

|          |                                                                                                                |                |              |                      |                                          |
|----------|----------------------------------------------------------------------------------------------------------------|----------------|--------------|----------------------|------------------------------------------|
| $[H_2]$  | aqueous concentration of $H_2$                                                                                 | $g\ H\ m^{-3}$ | [G5,G12,G16] |                      |                                          |
| $[H_2']$ | aqueous concentration of $H_2$ when $\Delta G_h = \Delta G'_h$ and $\Delta G_f = \Delta G'_f$                  | $g\ H\ m^{-3}$ | [G5,G16]     | $150 \times 10^{-6}$ | Brock and Madigan (1991)                 |
| $h$      | descriptor for hydrogenotrophic methanogens in each $M_i$                                                      |                |              |                      |                                          |
| $i$      | descriptor for organic matter-microbe complex ( $i$ = plant residue, manure, particulate OM, or humus)         |                |              |                      |                                          |
| $j$      | descriptor for structural or kinetic components for each functional type within each $M_i$ (e.g. $a$ = active) |                |              |                      |                                          |
| $K_c$    | M-M constant for uptake of $CO_2$ by hydrogenotrophic methanogens                                              | $g\ C\ m^{-3}$ | [G12]        | 0.12                 |                                          |
| $K_f$    | M-M constant for uptake of $DOC_{i,c}$ by fermenters and acetogens                                             | $g\ C\ m^{-3}$ | [G1]         | 12                   | McGill et al. (1981)                     |
| $K_i$    | inhibition constant for $O_2$ on fermentation                                                                  | $g\ O\ m^{-3}$ | [G1]         | 0.064                |                                          |
| $K_h$    | M-M constant for uptake of $H_2$ by hydrogenotrophic methanogens                                               | $g\ H\ m^{-3}$ | [G12]        | 0.01                 | Robinson and Tiedje (1982), Mosey (1983) |

|                             |                                                                                |                                    |           |                         |                                             |
|-----------------------------|--------------------------------------------------------------------------------|------------------------------------|-----------|-------------------------|---------------------------------------------|
| <b><math>K_m</math></b>     | M-M constant for uptake of $A_{i,c}$ by acetotrophic methanogens               | $\text{g C m}^{-3}$                | [G7]      | 12                      | Smith and Mah (1978), Zehnder et al. (1980) |
| <b><math>K_t</math></b>     | M-M constant for uptake of $\text{CH}_4$ by methanotrophs                      | $\text{g C m}^{-3}$                | [G18]     | $3 \times 10^{-3}$      | Conrad (1984)                               |
| $k$                         | descriptor for elemental fraction within each $j$ ( $j = c, n \text{ or } p$ ) |                                    |           |                         |                                             |
| <b>M</b>                    | microbial communities                                                          | $\text{g C m}^{-2}$                |           |                         |                                             |
| <b><math>M_h</math></b>     | hydrogenotrophic methanogen community                                          | $\text{g C m}^{-2}$                | [G12,G17] |                         |                                             |
| <b><math>M_{i,f}</math></b> | fermenter and acetogenic community                                             | $\text{g C m}^{-2}$                | [G1,G6]   |                         |                                             |
| <b><math>M_{i,m}</math></b> | acetotrophic methanogen community                                              | $\text{g C m}^{-2}$                | [G7,G11]  |                         |                                             |
| <b><math>M_t</math></b>     | autotrophic methanotrophic community                                           | $\text{g C m}^{-2}$                | [G18,G27] |                         |                                             |
| $m$                         | descriptor for acetotrophic methanogens in each $M_i$                          |                                    |           |                         |                                             |
| <b>DOC</b>                  | soluble organic matter                                                         | $\text{g C m}^{-2}$                | [G2]      |                         |                                             |
| <b>[DOC]</b>                | aqueous concentration of soluble organic matter                                | $\text{g C m}^{-3}$                | [G1]      |                         |                                             |
| <b>R</b>                    | gas constant                                                                   | $\text{kJ mol}^{-1} \text{K}^{-1}$ | [G5,G16]  | $8.3143 \times 10^{-3}$ |                                             |

|             |                                                                                                                                               |                                               |                       |      |                                                 |
|-------------|-----------------------------------------------------------------------------------------------------------------------------------------------|-----------------------------------------------|-----------------------|------|-------------------------------------------------|
| $R'_f$      | specific respiration by fermenters and acetogens at saturating $[P_{i,c}]$ , 30 °C and zero water potential                                   | $\text{g C g } M_{i,f,a}^{-1} \text{ h}^{-1}$ | [G1]                  | 0.4  | Lawrence (1971), Wofford et al. (1986)          |
| $R_h$       | CO <sub>2</sub> reduction by hydrogenotrophic methanogens                                                                                     | $\text{g C m}^{-2} \text{ h}^{-1}$            | [G12,G13,G14,G17,G18] |      |                                                 |
| $R'_h$      | specific CO <sub>2</sub> reduction by hydrogenotrophic methanogens at saturating $[H_2]$ and $[CO_2]$ , and at 30 °C and zero water potential | $\text{g C g } M_{h,a}^{-1} \text{ h}^{-1}$   | [G12]                 | 0.12 | Shea et al. (1968), Zehnder and Wuhrmann (1977) |
| $R_{i,f}$   | respiration of hydrolysis products by fermenters and acetogens                                                                                | $\text{g C m}^{-2} \text{ h}^{-1}$            | [G1,G2,G3,G6]         |      |                                                 |
| $R_{i,m}$   | respiration of acetate by acetotrophic methanogens                                                                                            | $\text{g C m}^{-2} \text{ h}^{-1}$            | [G7,G8,G9,G11]        |      |                                                 |
| $R'_m$      | specific respiration by acetotrophic methanogens at saturating $[A_{i,c}]$ , 30 °C and zero water potential                                   | $\text{g C g } M_{i,m,a}^{-1} \text{ h}^{-1}$ | [G7]                  | 0.20 | Smith and Mah (1980)                            |
| $R_{m,h,j}$ | maintenance respiration by hydrogenotrophic methanogens                                                                                       | $\text{g C m}^{-2} \text{ h}^{-1}$            | [G14,G17]             |      |                                                 |

|              |                                                                                         |                                   |                             |
|--------------|-----------------------------------------------------------------------------------------|-----------------------------------|-----------------------------|
| $R_{mi,f,j}$ | maintenance respiration by fermenters and acetogens                                     | $\text{g C m}^{-2} \text{h}^{-1}$ | [G3,G6]                     |
| $R_{mi,m,j}$ | maintenance respiration by acetotrophic methanogens                                     | $\text{g C m}^{-2} \text{h}^{-1}$ | [G9,G11]                    |
| $R_{m^t,j}$  | maintenance respiration by methanotrophs                                                | $\text{g C m}^{-2} \text{h}^{-1}$ | [G25,G27]                   |
| $R_t$        | CH <sub>4</sub> oxidation by methanotrophs for respiration                              | $\text{g C m}^{-2} \text{h}^{-1}$ | [G21b,G23,G24,<br>G25,G27a] |
| $R'_t$       | CH <sub>4</sub> oxidation by methanotrophs for respiration at saturating O <sub>2</sub> | $\text{g C m}^{-2} \text{h}^{-1}$ | [G19,G21b]                  |
| T            | soil temperature                                                                        | K                                 | [G5,G16]                    |
| $t$          | descriptor for autotrophic methanotrophs                                                |                                   |                             |
| $U_{h,c}$    | rate of CO <sub>2</sub> uptake by $M_h$                                                 | $\text{g C m}^{-2} \text{h}^{-1}$ | [G14,G17,G18]               |
| $U_{i,f,k}$  | rate of DOC <sub><math>i,k</math></sub> uptake by $M_{i,f}$                             | $\text{g C m}^{-2} \text{h}^{-1}$ | [G3,G6]                     |
| $U_{i,m,c}$  | rate of A <sub><math>i,c</math></sub> uptake by $M_{i,m}$                               | $\text{g C m}^{-2} \text{h}^{-1}$ | [G9,G11]                    |
| $U_{t,c}$    | rate of CH <sub>4</sub> uptake by $M_t$                                                 | $\text{g C m}^{-2} \text{h}^{-1}$ | [G25,G27]                   |
| $X_t$        | CH <sub>4</sub> oxidation by methanotrophs                                              | $\text{g C m}^{-2} \text{h}^{-1}$ | [G21a,G22]                  |

|          |                                                                                                                   |                                                        |               |     |               |
|----------|-------------------------------------------------------------------------------------------------------------------|--------------------------------------------------------|---------------|-----|---------------|
| $X'_t$   | CH <sub>4</sub> oxidation by methanotrophs at saturating O <sub>2</sub>                                           | g C m <sup>-2</sup> h <sup>-1</sup>                    | [G1,G2,G4a]   |     |               |
| $X'_t$   | specific CH <sub>4</sub> oxidation by methanotrophs at saturating O <sub>2</sub> , 30 °C and zero water potential | g C g <sup>-1</sup> h <sup>-1</sup>                    | [G18]         | 0.5 | Conrad (1984) |
| $Y_f$    | biomass yield from fermentation and acetogenic reactions                                                          | g M <sub>i,f</sub> g DOC <sub>i,c</sub> <sup>-1</sup>  | [G3,G4]       |     |               |
| $Y_h$    | biomass yield from hydrogenotrophic methanogenic reaction                                                         | g M <sub>h</sub> g CO <sub>2</sub> -C <sup>-1</sup>    | [G14,G15,G18] |     |               |
| $Y_m$    | biomass yield from acetotrophic methanogenic reaction                                                             | g M <sub>i,m</sub> g A <sub>i,c</sub> <sup>-1</sup>    | [G9,G10]      |     |               |
| $Y_{tG}$ | biomass yield from methanotrophic growth respiration                                                              | g M <sub>t</sub> -C g CH <sub>4</sub> -C <sup>-1</sup> | [G25a,G26]    |     |               |
| $Y_{tR}$ | ratio of CH <sub>4</sub> respired vs. CH <sub>4</sub> oxidized by methanotrophs                                   | g C g C <sup>-1</sup>                                  | [G19,G20]     |     |               |

## Appendix H: Inorganic N transformations

### Mineralization and immobilization of NH<sub>4</sub><sup>+</sup> by all microbial populations

$$I_{\text{NH}_4^{i,n,j}} = (M_{i,m,j,C} C_{\text{Nj}} - M_{i,m,j,N}) \quad (I_{\text{NH}_4^{i,n,j}} < 0) \quad [\text{H1a}]$$

$$I_{\text{NH}_4^{i,n,j}} = (M_{i,m,j,C} C_{\text{Nj}} - M_{i,m,j,N}) [\text{NH}_4^+] / ([\text{NH}_4^+] + K_{\text{NH}_4m}) \quad (I_{\text{NH}_4^{i,n,j}} > 0) \quad [\text{H1b}]$$

$$I_{\text{NO}_3^{i,n,j}} = (M_{i,m,j,C} C_{\text{Nj}} - (M_{i,m,j,N} + I_{\text{NH}_4^{i,n,j}})) [\text{NO}_3^-] / ([\text{NO}_3^-] + K_{\text{NO}_3m}) \quad (I_{\text{NO}_3^{i,n,j}} > 0) \quad [\text{H1b}]$$

### Oxidation of DOC and reduction of O<sub>2</sub> by heterotrophs

$$X'_{\text{DOC},i,h} = \{X'_{\text{DOC}} M_{i,h,a} [\text{DOC}] / ([\text{DOC}] + K_{\text{Xh}})\} f_i \quad [\text{H2}]$$

$$R'_{O_2i,h} = \mathbf{RQ}_C X'_{\text{DOC}i,h} \quad [\text{H3}]$$

$$R_{O_2i,h} = 4\pi n M_{i,h,a} D_{sO_2} ([O_{2s}] - [O_{2mi,h}]) [r_m r_w / (r_w - r_m)] \quad [\text{H4a}]$$

$$= R'_{O_2i,h} [O_{2mi,h}] / ([O_{2mi,h}] + \mathbf{K}_{O_2h}) \quad [\text{H4b}]$$

$$X_{\text{DOC}i,h} = X'_{\text{DOC}i,h} R_{O_2i,h} / R'_{O_2i,h} \quad [\text{H5}]$$

### **Oxidation of DOC and reduction of $\text{NO}_3^-$ , $\text{NO}_2^-$ and $\text{N}_2\text{O}$ by denitrifiers**

$$R'_{\text{NO}_3i,d} = \mathbf{E}_{\text{NO}_x} f_e (R'_{O_2i,d} - R_{O_2i,d}) \quad [\text{H6}]$$

$$R_{\text{NO}_3i,d} = R'_{\text{NO}_3i,d} [\text{NO}_3^-] / ([\text{NO}_3^-] + \mathbf{K}_{\text{NO}_3d}) \quad [\text{H7}]$$

$$R_{\text{NO}_2i,d} = (R'_{\text{NO}_3i,d} - R_{\text{NO}_3i,d}) [\text{NO}_2^-] / ([\text{NO}_2^-] + \mathbf{K}_{\text{NO}_2d}) \quad [\text{H8}]$$

$$R_{\text{N}_2\text{O}i,d} = 2 (R'_{\text{NO}_3i,d} - R_{\text{NO}_3i,d} - R_{\text{NO}_2i,d}) [\text{N}_2\text{O}] / ([\text{N}_2\text{O}] + \mathbf{K}_{\text{N}_2\text{O}d}) \quad [\text{H9}]$$

$$X_{\text{DOC}i,d} = X_{\text{DOC}i,d} \text{ (from [H5])} + \mathbf{F}_{\text{NO}_x} (R_{\text{NO}_3i,d} + R_{\text{NO}_2i,d}) + \mathbf{F}_{\text{N}_2\text{O}} R_{\text{N}_2\text{O}i,d} \quad [\text{H10}]$$

### **Oxidation of $\text{NH}_3$ and reduction of $\text{O}_2$ by nitrifiers**

$$X'_{\text{NH}_3i,n} = X'_{\text{NH}_3} M_{i,n,a} \{ [\text{NH}_3\text{S}] / ([\text{NH}_3\text{S}] + \mathbf{K}_{\text{NH}_3n}) \} \{ [\text{CO}_2\text{S}] / ([\text{CO}_2\text{S}] + \mathbf{K}_{\text{CO}_2}) \} f_i \quad [\text{H11}]$$

$$R'_{O_2i,n} = \mathbf{RQ}_{\text{NH}_3} X'_{\text{NH}_3i,n} + \mathbf{RQ}_C X'_{\text{C}i,n} \quad [\text{H12}]$$

$$R_{O_2i,n} = 4\pi n M_{i,n,a} D_{sO_2} (r_m r_w / (r_w - r_m)) ([O_{2s}] - [O_{2mi,n}]) \quad [\text{H13a}]$$

$$= R'_{O_2i,n} [O_{2mi,n}] / ([O_{2mi,n}] + \mathbf{K}_{O_2n}) \quad [\text{H13b}]$$

$$X_{\text{NH}_3i,n} = X'_{\text{NH}_3i,n} R_{O_2i,n} / R'_{O_2i,n} \quad [\text{H14}]$$

### Oxidation of NO<sub>2</sub><sup>-</sup> and reduction of O<sub>2</sub> by nitrifiers

$$X'_{\text{NO}_2i,o} = X'_{\text{NO}_2} M_{i,o,a} \left\{ \frac{[\text{NO}_2^-]}{[\text{NO}_2^-] + K_{\text{NO}_2o}} \right\} \left\{ \frac{[\text{CO}_2\text{S}]}{[\text{CO}_2\text{S}] + K_{\text{CO}_2}} \right\} f_i \quad [\text{H15}]$$

$$R'_{\text{O}_2i,o} = R_{\text{QNO}_2} X'_{\text{NO}_2i,o} + R_{\text{QC}} X'_{\text{Ci,o}} \quad [\text{H16}]$$

$$R_{\text{O}_2i,o} = 4\pi n M_{i,o,a} D_{\text{SO}_2} (r_m r_w / (r_w - r_m)) ([\text{O}_2\text{S}] - [\text{O}_2\text{mi,o}]) \quad [\text{H17a}]$$

$$= R'_{\text{O}_2i,o} [\text{O}_2\text{mi,o}] / ([\text{O}_2\text{mi,o}] + K_{\text{O}_2o}) \quad [\text{H17b}]$$

$$X_{\text{NO}_2i,o} = X'_{\text{NO}_2i,o} R_{\text{O}_2i,o} / R'_{\text{O}_2i,o} \quad [\text{H18}]$$

### Oxidation of NH<sub>3</sub> and reduction of NO<sub>2</sub><sup>-</sup> by nitrifiers

$$R'_{\text{NO}_2i,n} = E_{\text{NO}_x} f_e (R'_{\text{O}_2i,n} - R_{\text{O}_2i,n}) \quad [\text{H19}]$$

$$R_{\text{NO}_2i,n} = R'_{\text{NO}_2i,n} \left\{ \frac{[\text{NO}_2^-]}{[\text{NO}_2^-] + K_{\text{NO}_2n}} \right\} \left\{ \frac{[\text{CO}_2\text{S}]}{[\text{CO}_2\text{S}] + K_{\text{CO}_2}} \right\} \quad [\text{H20}]$$

$$X_{\text{NH}_3i,n} = X_{\text{NH}_3i,n} (\text{from [H14]}) + 0.33 R_{\text{NO}_2i,n} \quad [\text{H21}]$$

### Definition of variables in appendix H

| Name | Definition | Units | Equations | Input Values | Reference |
|------|------------|-------|-----------|--------------|-----------|
|------|------------|-------|-----------|--------------|-----------|

#### *Subscripts*

|          |                                                            |
|----------|------------------------------------------------------------|
| <i>a</i> | active component of M <sub><i>i,m</i></sub>                |
| <i>d</i> | heterotrophic denitrifier population (subset of <i>h</i> ) |



|          |                                                               |
|----------|---------------------------------------------------------------|
| <i>h</i> | heterotrophic community (subset of <i>m</i> )                 |
| <i>i</i> | substrate-microbe complex                                     |
| <i>j</i> | kinetic components of $M_{i,m}$                               |
| <i>m</i> | all microbial communities                                     |
| <i>n</i> | autotrophic ammonia oxidizer population (subset of <i>m</i> ) |
| <i>o</i> | autotrophic nitrite oxidizer population (subset of <i>m</i> ) |

*Variables*

|                            |                                                                                               |                     |               |                                                   |
|----------------------------|-----------------------------------------------------------------------------------------------|---------------------|---------------|---------------------------------------------------|
| $C_{Nj}$                   | maximum ratio of $M_{i,m,j,N}$ to $M_{i,m,j,C}$ maintained by $M_{i,m,j}$                     | $g\ N\ g\ C^{-1}$   | [H1]          | 0.22 and 0.13 for <i>j</i> = labile and resistant |
| [CO <sub>2s</sub> ]        | CO <sub>2</sub> concentration in soil solution                                                | $g\ C\ m^{-3}$      | [H11,H15,H20] |                                                   |
| [DOC <sub><i>i</i></sub> ] | concentration of dissolved decomposition products                                             | $g\ C\ m^{-3}$      | [H2]          |                                                   |
| $D_{sO_2}$                 | aqueous dispersivity-diffusivity of O <sub>2</sub>                                            | $m^2\ h^{-1}$       | [H4,H13,H17]  |                                                   |
| $E_{NO_x}$                 | e <sup>-</sup> accepted by NO <sub>x</sub> vs. O <sub>2</sub> when oxidizing DOC              | $g\ N\ g\ O_2^{-1}$ | [H6,H19]      | 28/32 = 0.875                                     |
| $F_{NO_x}$                 | e <sup>-</sup> donated by C vs. e <sup>-</sup> accepted by NO <sub>x</sub> when oxidizing DOC | $g\ C\ g\ N^{-1}$   | [H10]         | 12/28 = 0.43                                      |

|                    |                                                                                                                     |                        |               |              |                          |
|--------------------|---------------------------------------------------------------------------------------------------------------------|------------------------|---------------|--------------|--------------------------|
| $F_{N_2O}$         | $e^-$ donated by C vs. $e^-$ accepted by $N_2O$ when oxidizing DOC                                                  | $g\ C\ g\ N^{-1}$      | [H10]         | 6/28 = 0.215 |                          |
| $f_e$              | fraction of electrons not accepted by $O_2$ transferred to N oxides                                                 | -                      | [H6,H19]      | 0.25         | Koike and Hattori (1975) |
| $f_t$              | temperature function for microbial processes                                                                        | -                      | [H2,H11]      |              |                          |
| $I_{NH_4^{i,n,j}}$ | mineralization ( $I_{NH_4^{i,n,j}} < 0$ ) or immobilization ( $I_{NH_4^{i,n,j}} > 0$ ) of $NH_4^+$ by $M_{i,n,j,C}$ | $g\ N\ m^{-2}\ h^{-1}$ | [H1]          |              |                          |
| $I_{NO_3^{i,n,j}}$ | immobilization ( $I_{NO_3^{i,n,j}} > 0$ ) of $NO_3^-$ by $M_{i,n,j,C}$                                              | $g\ N\ m^{-2}\ h^{-1}$ | [H1]          |              |                          |
| $K_{CO_2}$         | Michaelis-Menten constant for reduction of $CO_2S$ by $M_{i,n,a}$ and $M_{i,o,a}$                                   | $g\ C\ m^{-3}$         | [H11,H15,H20] | 0.15         |                          |
| $K_{NH_3^n}$       | M-M constant for oxidation of $NH_3S$ by nitrifiers                                                                 | $g\ N\ m^{-3}$         | [H11]         | 0.01         | Suzuki et al. (1974)     |
| $K_{NH_4^m}$       | M-M constant for microbial $NH_4^+$ uptake                                                                          | $g\ N\ m^{-3}$         | [H1]          | 0.35         |                          |
| $K_{NO_2^d}$       | M-M constant for reduction of $NO_2^-$ by denitrifiers                                                              | $g\ N\ m^{-3}$         | [H8]          | 3.5          | Yoshinari et al. (1977)  |
| $K_{NO_2^n}$       | M-M constant for reduction of $NO_2^-$ by nitrifiers                                                                | $g\ N\ m^{-3}$         | [H20]         | 3.5          |                          |

|             |                                                            |                  |           |       |                             |
|-------------|------------------------------------------------------------|------------------|-----------|-------|-----------------------------|
| $K_{NO_2o}$ | M-M constant for oxidation of $NO_2^-$ by nitrifiers       | $g\ N\ m^{-3}$   | [H15]     | 10    |                             |
| $K_{NO_3d}$ | M-M constant for reduction of $NO_3^-$ by denitrifiers     | $g\ N\ m^{-3}$   | [H7]      | 3.5   | Yoshinari et al. (1977)     |
| $K_{N_2Od}$ | M-M constant for reduction of $N_2O$ by denitrifiers       | $g\ N\ m^{-3}$   | [H9]      | 0.35  | Yoshinari et al. (1977)     |
| $K_{O_2h}$  | M-M constant for reduction of $O_2s$ by heterotrophs       | $g\ O_2\ m^{-3}$ | [H4b]     | 0.064 | Griffin (1972)              |
| $K_{O_2n}$  | M-M constant for reduction of $O_2s$ by $NH_3$ oxidizers   | $g\ O_2\ m^{-3}$ | [H13b]    | 0.32  | Focht and Verstraete (1977) |
| $K_{O_2o}$  | M-M constant for reduction of $O_2s$ by $NO_2^-$ oxidizers | $g\ O_2\ m^{-3}$ | [H17b]    | 0.32  | Focht and Verstraete (1977) |
| $K_{Xh}$    | M-M constant for oxidation of DOC by heterotrophs          | $g\ C\ m^{-3}$   | [H2]      | 12    | McGill et al. (1981)        |
| $M_{i,h,a}$ | active biomass of heterotrophs                             | $g\ C\ m^{-2}$   | [H2,H7]   |       |                             |
| $M_{i,n,a}$ | active biomass of $NH_3$ oxidizers                         | $g\ C\ m^{-2}$   | [H11,H13] |       |                             |

|                        |                                                                                                                          |                                    |              |
|------------------------|--------------------------------------------------------------------------------------------------------------------------|------------------------------------|--------------|
| $M_{i,m,j,C}$          | C biomass of microbial population $M_{i,m,j}$                                                                            | $\text{g C m}^{-2}$                | [H1]         |
| $M_{i,m,j,N}$          | N biomass of microbial population $M_{i,m,j}$                                                                            | $\text{g N m}^{-2}$                | [H1]         |
| $M_{i,o,a}$            | active biomass of $\text{NO}_2^-$ oxidizers                                                                              | $\text{g C m}^{-2}$                | [H15,H17]    |
| $[\text{NH}_3]$        | concentration of $\text{NH}_3$ in soil solution                                                                          | $\text{g N m}^{-3}$                | [H11]        |
| $[\text{NH}_4^+]$      | concentration of $\text{NH}_4^+$ in soil solution                                                                        | $\text{g N m}^{-3}$                | [H1]         |
| $[\text{NO}_2^-]$      | concentration of $\text{NO}_2^-$ in soil solution                                                                        | $\text{g N m}^{-3}$                | [H8,H15,H20] |
| $[\text{NO}_3^-]$      | concentration of $\text{NO}_3^-$ in soil solution                                                                        | $\text{g N m}^{-3}$                | [H7]         |
| $[\text{N}_2\text{O}]$ | concentration of $\text{N}_2\text{O}$ in soil solution                                                                   | $\text{g N m}^{-3}$                | [H9]         |
| $n$                    | number of microbes                                                                                                       | $\text{g}^{-1}$                    | [H13,H17]    |
| $[\text{O}_{2mi,h}]$   | $\text{O}_2$ concentration at heterotrophic surfaces                                                                     | $\text{g O}_2 \text{ m}^{-3}$      | [H7]         |
| $[\text{O}_{2mi,n}]$   | $\text{O}_2$ concentration at $\text{NH}_3$ oxidizer surfaces                                                            | $\text{g O}_2 \text{ m}^{-3}$      | [H13]        |
| $[\text{O}_{2mi,o}]$   | $\text{O}_2$ concentration at $\text{NO}_2^-$ oxidizer surfaces                                                          | $\text{g O}_2 \text{ m}^{-3}$      | [H17]        |
| $[\text{O}_{2s}]$      | $\text{O}_2$ concentration in soil solution                                                                              | $\text{g O}_2 \text{ m}^{-3}$      | [H7,H13,H17] |
| $R_{\text{NO}_2i,d}$   | $\text{NO}_2^-$ reduction by denitrifiers                                                                                | $\text{g N m}^{-2} \text{ h}^{-1}$ | [H8,H9,H10]  |
| $R'_{\text{NO}_2i,n}$  | rate of $\text{NO}_2^-$ reduction by $\text{NH}_3$ oxidizers under non-limiting $[\text{NO}_2^-]$ and $[\text{CO}_{2s}]$ | $\text{g N m}^{-2} \text{ h}^{-1}$ | [H19,H20]    |

|                |                                                                                         |                          |                   |
|----------------|-----------------------------------------------------------------------------------------|--------------------------|-------------------|
| $R_{NO_2i,n}$  | rate of $NO_2^-$ reduction by $NH_3$ oxidizers under ambient $[NO_2^-]$ and $[CO_{2S}]$ | $g\ N\ m^{-2}\ h^{-1}$   | [H20,H21]         |
| $R'_{NO_3i,d}$ | $NO_3^-$ reduction by denitrifiers under non-limiting $[NO_3^-]$                        | $g\ N\ m^{-2}\ h^{-1}$   | [H6,H7,H8,H9]     |
| $R_{NO_3i,d}$  | $NO_3^-$ reduction by denitrifiers under ambient $[NO_3^-]$                             | $g\ N\ m^{-2}\ h^{-1}$   | [H7,H8,H9,H10]    |
| $R_{N_2O_i,d}$ | $N_2O$ reduction by denitrifiers                                                        | $g\ N\ m^{-2}\ h^{-1}$   | [H9,H10]          |
| $R'_{O_2i,d}$  | rate of $O_{2S}$ reduction by denitrifiers under non-limiting $[O_{2S}]$                | $g\ O_2\ m^{-2}\ h^{-1}$ | [H6]              |
| $R_{O_2i,d}$   | rate of $O_{2S}$ reduction by denitrifiers under ambient $[O_{2S}]$                     | $g\ O_2\ m^{-2}\ h^{-1}$ | [H6]              |
| $R'_{O_2i,h}$  | rate of $O_{2S}$ reduction by heterotrophs under non-limiting $[O_{2S}]$                | $g\ O_2\ m^{-2}\ h^{-1}$ | [H3,H4,H5]        |
| $R_{O_2i,h}$   | rate of $O_{2S}$ reduction by heterotrophs under ambient $[O_{2S}]$                     | $g\ O_2\ m^{-2}\ h^{-1}$ | [H4,H5]           |
| $R'_{O_2i,n}$  | rate of $O_{2S}$ reduction by $NH_3$ oxidizers under non-limiting $[O_{2S}]$            | $g\ O_2\ m^{-2}\ h^{-1}$ | [H12,H13.H14,H19] |

|                                    |                                                                                  |                       |               |      |                                          |
|------------------------------------|----------------------------------------------------------------------------------|-----------------------|---------------|------|------------------------------------------|
| $R_{O_2i,n}$                       | rate of $O_{2S}$ reduction by $NH_3$ oxidizers under ambient [ $O_{2S}$ ]        | $g O_2 m^{-2} h^{-1}$ | [H13,H14,H19] |      |                                          |
| $R'_{O_2i,o}$                      | rate of $O_{2S}$ reduction by $NO_2^-$ oxidizers under non-limiting [ $O_{2S}$ ] | $g O_2 m^{-2} h^{-1}$ | [H16,H17,H18] |      |                                          |
| $R_{O_2i,o}$                       | rate of $O_{2S}$ reduction by $NO_2^-$ oxidizers under ambient [ $O_{2S}$ ]      | $g O_2 m^{-2} h^{-1}$ | [H17,H18]     |      |                                          |
| <b>RQ<sub>C</sub></b>              | respiratory quotient for reduction of $O_2$ coupled to oxidation of C            | $g O_2 g C^{-1}$      | [H3,H12,H16]  | 2.67 | Brock and Madigan (1991)                 |
| <b>RQ<sub>NH<sub>3</sub></sub></b> | respiratory quotient for reduction of $O_2$ coupled to oxidation of $NH_{3S}$    | $g O_2 g N^{-1}$      | [H12]         | 3.43 | Brock and Madigan (1991)                 |
| <b>RQ<sub>NO<sub>2</sub></sub></b> | respiratory quotient for reduction of $O_2$ coupled to oxidation of $NO_2^-$     | $g O_2 g N^{-1}$      | [H16]         | 1.14 | Brock and Madigan (1991)                 |
| $r_m$                              | radius of microbial sphere                                                       | m                     | [H4,H13,H17]  |      |                                          |
| $r_w$                              | radius of $r_m$ + water film at current soil water potential                     | m                     | [H4,H13,H17]  |      | from $\psi_s$ according to Kemper (1966) |
| $X'_{Ci,n}$                        | rate of C oxidation by $NH_3$ oxidizers under non-limiting [ $O_{2S}$ ]          | $g C m^{-2} h^{-1}$   | [H12]         |      |                                          |

|                          |                                                                                                                                                          |                                     |               |       |                           |
|--------------------------|----------------------------------------------------------------------------------------------------------------------------------------------------------|-------------------------------------|---------------|-------|---------------------------|
| $X'_{C_{i,o}}$           | rate of C oxidation by $\text{NO}_2^-$ oxidizers under non-limiting $[\text{O}_{2\text{S}}]$                                                             | $\text{g C m}^{-2} \text{h}^{-1}$   | [H16]         |       |                           |
| $X'_{\text{DOC}}$        | specific rate of DOC oxidation by heterotrophs at 25 °C under non-limiting [DOC] and $[\text{O}_{2\text{S}}]$                                            | $\text{g C g C}^{-1} \text{h}^{-1}$ | [H2]          | 0.125 | Shields et al. (1973)     |
| $X'_{\text{DOC}_{i,h}}$  | rate of DOC oxidation by heterotrophs under non-limiting $[\text{O}_{2\text{S}}]$                                                                        | $\text{g N m}^{-2} \text{h}^{-1}$   | [H2,H3,H5]    |       |                           |
| $X_{\text{DOC}_{i,h}}$   | rate of DOC oxidation by heterotrophs under ambient $[\text{O}_{2\text{S}}]$                                                                             | $\text{g N m}^{-2} \text{h}^{-1}$   | [H5]          |       |                           |
| $X_{\text{DOC}_{i,d}}$   | rate of DOC oxidation by heterotrophs under ambient $[\text{O}_{2\text{S}}]$ and $[\text{NO}_x]$                                                         | $\text{g N m}^{-2} \text{h}^{-1}$   | [H10]         |       |                           |
| $X'_{\text{NH}_3}$       | specific rate of $\text{NH}_3$ oxidation by $\text{NH}_3$ oxidizers at 25 °C under non-limiting $[\text{O}_{2\text{S}}]$                                 | $\text{g N g C}^{-1} \text{h}^{-1}$ | [H11]]        | 0.625 | Belser and Schmidt (1980) |
| $X_{\text{NH}_3_{i,n}}$  | rate of $\text{NH}_3$ oxidation by $\text{NH}_3$ oxidizers coupled with reduction of $\text{O}_2 + \text{NO}_2^-$ under ambient $[\text{O}_{2\text{S}}]$ | $\text{g N m}^{-2} \text{h}^{-1}$   | [H14,H21]     |       |                           |
| $X'_{\text{NH}_3_{i,n}}$ | rate of $\text{NH}_3$ oxidation by $\text{NH}_3$ oxidizers under non-limiting $[\text{O}_{2\text{S}}]$                                                   | $\text{g N m}^{-2} \text{h}^{-1}$   | [H11,H12,H14] |       |                           |

|                |                                                                                                           |                           |               |     |               |
|----------------|-----------------------------------------------------------------------------------------------------------|---------------------------|---------------|-----|---------------|
| $X'_{NO_2i,o}$ | rate of $NO_2^-$ oxidation by $NO_2^-$ oxidizers under non-limiting $[O_{2s}]$                            | $g\ N\ m^{-2}\ h^{-1}$    | [H15,H16,H18] |     |               |
| $X_{NO_2i,o}$  | rate of $NO_2^-$ oxidation by $NO_2^-$ oxidizers coupled with reduction of $O_2$ under ambient $[O_{2s}]$ | $g\ N\ m^{-2}\ h^{-1}$    | [H18]         |     |               |
| $X'_{NO_2}$    | specific rate of $NO_2^-$ oxidation by $NO_2^-$ oxidizers at 25 °C under non-limiting $[O_{2s}]$          | $g\ N\ g\ C^{-1}\ h^{-1}$ | [H15]         | 2.5 | Belser (1977) |



553

554 **References**

555

556 Addiscott, T. M.: Kinetics and temperature relationships of mineralization and  
557 nitrification in Rothamsted soils with differing histories, *J. Soil Sci.*, 34, 343-353,  
558 doi: 10.1111/j.1365-2389.1983.tb01040.x, 1983.

559 Anthony, C.: *The Biochemistry of Methylootrophs*, Academic Press, London, UK, 1982.

560 Barber, S. A., and Silberbush, M.: Plant root morphology and nutrient uptake, in: *Roots, Nutrient  
561 and Water Influx, and Plant Growth*, edited by: Barber, S. A., and Bouldin, D. R., Amer. Soc.  
562 Agron. Spec. Publ. no. 49, Madison, WI, 65-87, 1984.

563 Barnes, B.V., Zak, D. R., Denton, S. R., and Spurr, S. H.: *Forest Ecology*, 4<sup>th</sup> edition,  
564 Wiley and Sons, NY, 1998.

565 Belser, L.W., and Schmidt, E. L.: Growth and oxidation kinetics of the three genera of  
566 ammonia oxidizers, *FEMS Microbiol. Lett.*, 7, 213-216, doi: 10.1111/j.1574-  
567 6941.1980.tb01628.x, 1980.

568 Belser, L.W.: Nitrate reduction to nitrite, a possible source of nitrite for growth of nitrite-  
569 oxidizing bacteria, *Appl. Environ. Micro.*, 34, 403-410, 1977.

570 Bernacchi, C. J., Singaas, E. L., Pimentel, C., Portis, A. L., and Long, S. P.: Improved  
571 temperature response functions for models of rubisco-limited photosynthesis, *Plant  
572 Cell Environ.*, 24, 253-259, doi: 10.1111/j.1365-3040.2001.00668.x, 2001.

573 Bernacchi, C. J., Pimentel, C., and Long, S. P.: In vivo temperature response functions of  
574 parameters required to model RuBP-limited photosynthesis, *Plant Cell Environ.*, 26,  
575 1419–1430, doi: 10.1046/j.0016-8025.2003.01050.x, 2003.

576 Berry, J. A., and Farquhar, G. D.: The CO<sub>2</sub> concentrating function of photosynthesis: a  
577 biochemical model, in: Proceedings of the 4th Internatl. Congress on Photosynthesis,  
578 edited by: Hall, D., Coombs, J., and Goodwin, T., Biochemical Society, London, 119-  
579 131, 1978.

580 Brock, T. D., and Madigan, M. T.: Biology of Microorganisms, 6<sup>th</sup> edition, Prentice Hall,  
581 NJ, 1991.

582 Campbell, G. S.: Soil Physics with BASIC, Elsevier, Netherlands, 1985.

583 Conrad, R.: Capacity of aerobic microorganisms to utilize and grow on atmospheric trace  
584 gases (H<sub>2</sub>, CO, CH<sub>4</sub>), in: Current Perspectives in Microbial Ecology, edited by: Klug,  
585 M. J., and Reddy, C. A., Amer. Soc. Microbiol. Wash. DC, 461-467, 1984.

586 de Vries, D.A.: Thermal properties of soils, in: Physics of Plant Environment, edited by:  
587 van Wijk, R., North Holland Publishing Co., Amsterdam, Netherlands, 210-235, 1963.

588 Dimitrov, D. D., Grant, R. F., Lafleur, P. M., and Humphreys, E. R.: Modelling  
589 subsurface hydrology of Mer Bleue bog, Soil Sci. Soc. Am. J., 74, 680–694,  
590 doi:10.2136/sssaj2009.0148, 2010.

591 Doussan C., Vercambre, G., and Pagès, L.: Modelling of the hydraulic architecture of  
592 root systems: An integrated approach to water absorption-distribution of axial and  
593 radial conductances in maize, Ann. Bot., 81, 225-232, doi: 10.1006/anbo.1997.0541,  
594 1998.

595 Edwards, G., and Walker, D.: C<sub>3</sub>, C<sub>4</sub>: Mechanisms, and Cellular and Environmental  
596 Regulation of Photosynthesis, Univ. of California Press, Berkely, CA, 1983.

597 Farquhar, G. D., von Caemmerer, S., and Berry, J. A.: A biochemical model of photosynthetic  
598 CO<sub>2</sub> assimilation in leaves of C<sub>3</sub> species, *Planta*, 149, 78-90, doi: 10.1007/BF00386231,  
599 1980.

600 Focht, D. D., and Verstraete, W.: Biochemical ecology of nitrification and denitrification, *Adv.*  
601 *Micro. Ecol.*, 1, 135-214, 1977.

602 Furbank, F. T., and Hatch, M. D.: Mechanism of C<sub>4</sub> photosynthesis, The size and composition  
603 of the inorganic carbon pool in bundle sheath cells, *Plant Physiol.*, 85, 958-964, doi:  
604 10.1104/pp.85.4.958, 1987.

605 Grant, R. F.: Mathematical modelling of nitrous oxide evolution during nitrification, *Soil Biol.*  
606 *Biochem.*, 27, 1117-1125, doi: 10.1016/0038-0717(95)00038-G, 1995.

607 Grant, R. F.: Mathematical modelling of nitrous oxide evolution during nitrification, *Soil Biol.*  
608 *Biochem.*, 27, 1117-1125, doi: 10.1016/0038-0717(95)00038-G, 1995.

609 Grant, R. F.: Simulation in *ecosys* of root growth response to contrasting soil water and  
610 nitrogen, *Ecol. Model.*, 107, 237-264, doi: 10.1016/S0304-3800(97)00221-4, 1998a.

611 Grant, R. F.: Simulation of methanogenesis in the mathematical model *ecosys*, *Soil Biol.*  
612 *Biochem.*, 30, 883-896, doi: 10.1016/S0038-0717(97)00218-6, 1998b.

613 Grant, R. F.: Simulation of methanotrophy in the mathematical model *ecosys*, *Soil Biol.*  
614 *Biochem.*, 31, 287-297, doi: 10.1016/S0038-0717(98)00119-9, 1999.

615 Grant, R. F.: A review of the Canadian ecosystem model *ecosys*, in: *Modeling Carbon*  
616 *and Nitrogen Dynamics for Soil Management*, edited by: Shaffer, M., CRC Press,  
617 Boca Raton, Fla., 173–264, 2001.

618 Grant, R. F.: Modelling topographic effects on net ecosystem productivity of boreal black  
619 spruce forests, *Tree Physiol.*, 24, 1-18, doi: 10.1093/treephys/24.1.1, 2004.

620 Grant, R. F., and Flanagan, L. B.: Modeling stomatal and nonstomatal effects of water  
621 deficits on CO<sub>2</sub> fixation in a semiarid grassland, *J. Geophys. Res.-Biogeosci.*, 112,  
622 G03011, doi: 10.1029/2006JG000302, 2007.

623 Grant, R. F., and Heaney, D. J.: Inorganic phosphorus transformation and transport in  
624 soils: mathematical modelling in *ecosys*, *Soil Sci. Soc. Am. J.*, 61, 752-764, doi:  
625 10.2136/sssaj1997.03615995006100030008x, 1997.

626 Grant, R. F., and Hesketh, J. D.: Canopy structure of maize (*Zea mays L.*) at different  
627 populations: simulation and experimental verification, *Biotronics*, 21, 11-24, 1992.

628 Grant, R. F., and Rochette, P.: Soil microbial respiration at different temperatures and  
629 water potentials: Theory and mathematical modeling, *Soil Sci. Soc. Am. J.*, 58, 1681-  
630 1690, doi: 10.2136/sssaj1994.03615995005800060015x, 1994.

631 Grant, R. F., Juma, N. G., and McGill, W. B.: Simulation of carbon and nitrogen  
632 transformations in soils: Mineralization, *Soil Biol. Biochem.*, 25, 1317-1329, doi:  
633 10.1016/0038-0717(93)90046-E, 1993a.

634 Grant, R. F., Juma, N. G., and McGill, W. B.: Simulation of carbon and nitrogen  
635 transformations in soils: Microbial biomass and metabolic products, *Soil Biol.*  
636 *Biochem.*, 25, 1331-1338, doi: 10.1016/0038-0717(93)90047-F, 1993b.

637 Grant, R. F., Wall, G. W., Kimball, B. A., Frumau, K. F. A., Pinter Jr., P. J., Hunsaker, D.  
638 J., and Lamorte, R. L.: Crop water relations under different CO<sub>2</sub> and irrigation: testing  
639 of *ecosys* with the Free Air CO<sub>2</sub> Enrichment (FACE) experiment, *Agricult. Forest*  
640 *Meteorol.*, 95, 27-51, doi: 10.1016/S0168-1923(99)00017-9, 1999.

641 Grant, R.F., Amrani, M., Heaney, D. J., Wright, R., and Zhang, M.: Mathematical  
642 modelling of phosphorus losses from land application of hog and cattle manure, J.  
643 Environ. Qual., 33, 210-231, doi: 10.2134/jeq2004.2100, 2004.

644 Grant, R. F., Kimball, B. A., Wall, G. W., Triggs, J. M., Brooks, T. J., Pinter Jr., P. J.,  
645 Conley, M. M., Ottman, M. J., Lamorte, R. L., Leavitt, S. W., Thompson, T. L., and  
646 Matthias, A. D.: Modeling elevated carbon dioxide effects on water relations, water  
647 use, and growth of irrigated sorghum, Agron. J., 96, 1693-1705, doi:  
648 10.2134/agronj2004.1693, 2004.

649 Grant, R. F., Black, T. A., Humphreys, E. R., and Morgenstern, K.: Changes in net  
650 ecosystem productivity with forest age following clearcutting of a coastal Douglas fir  
651 forest: testing a mathematical model with eddy covariance measurements along a  
652 forest chronosequence, Tree Physiol., 27, 115-131, doi: 0.1093/treephys/27.1.115,  
653 2007.

654 Grant, R. F., Barr, A. G., Black, T. A., Margolis, H. A., McCaughey, J. H., and  
655 Trofymow, J. A.: Net ecosystem productivity of temperate and boreal forests after  
656 clearcutting—a Fluxnet-Canada synthesis, Tellus B, 62, 475-496, doi: 10.1111/j.1600-  
657 0889.2010.00500.x, 2010.

658 Green, R. E., and Corey, R. B.: Calculation of hydraulic conductivity: A further  
659 evaluation of some predictive methods, Soil Sci. Soc. Am. Proc., 35, 3–8, doi:  
660 10.2136/sssaj1971.03615995003500010010x, 1971.

661 Griffin, D. M.: Ecology of Soil Fungi, Syracuse Univ. Press, Syracuse NY, 1972.

662 Jiao, J. A., and Chollet, R.: Light/dark regulation of maize leaf phosphoenol pyruvate  
663 carboxylase by in vivo phosphorylation, Arch. Biochem. Biophys., 261, 409-417, doi:  
664 10.1016/0003-9861(88)90357-8, 1988.

665 Kemper, W. D., and Rollins, J. B.: Osmotic efficiency coefficients across compacted  
666 clays, Soil Sci. Soc. Amer. J., 30, 529-534, doi: 10.2136/sssaj1966.0361599500300  
667 0050005x, 1966.

668 Kimmins, J. P.: Forest Ecology, Pearson Prentice Hall, NJ, 2004.

669 Koike, I., and Hattori, A.: Growth yield of a denitrifying bacterium, *Pseudomonas*  
670 *denitrificans*, under aerobic and denitrifying conditions, Soc. General Microbiol., 88,  
671 1-10, doi: 10.1099/00221287-88-1-1, 1975.

672 Laisk, A., and Edwards, G. E.: A mathematical model of C<sub>4</sub> photosynthesis: The  
673 mechanism of concentrating CO<sub>2</sub> in NADP-malic enzyme type species, Photosyn.  
674 Res., 66, 199-224, doi: 10.1023/A:1010695402963, 2000.

675 Larcher, W.: Physiological Plant Ecology, 4<sup>th</sup> edition, Springer-Verlag, Berlin, 2001.

676 Lawlor, D.: Photosynthesis: Molecular, Physiological and Environmental Processes,  
677 Longman Group, Essex, UK, 1993.

678 Lawrence, A. L.: Anaerobic biological treatment processes, in: Advances in Chemistry  
679 Series 105, edited by: Gould, R. F., Amer. Chem. Soc. Wash. DC, 163-189, 1971.

680 Leegood, R. C.: Transport during C<sub>4</sub> photosynthesis, in: Advances in Photosynthesis:  
681 Physiology and Metabolism, edited by: Leegood, R. C., Sharkey, T.D. and von  
682 Caemmerer, S., Kluwer Academic Publishers, Dordrecht, 449-469, 2000.

683 Lizama, H. M., and Suzuki, I.: Kinetics of sulfur and pyrite oxidation by *Thiobacillus*  
684 *thiooxidans*. Competitive inhibition by increasing concentrations of cells, *Can. J.*  
685 *Microbio.*, 37, 182-187, doi: 10.1139/m91-028, 1990.

686 Luxmoore, R. J., Stolzy, L. H., and Letey J.: Oxygen diffusion in the soil-plant system. I. a  
687 model, *Agron. J.*, 62, 317-322, doi: 10.2134/agronj1970.00021962006200030003x, 1970a.

688 Luxmoore, R. J., Stolzy, L. H., and Letey, J.: Oxygen diffusion in the soil-plant system. II.  
689 Respiration rate, permeability, and porosity of consecutive excised segments of maize and  
690 rice roots, *Agron. J.*, 62, 322-324, doi: 10.2134/agronj1970.00021962006200030004x, 1970b.

691 McGill, W. B., Hunt, H. W., Woodmansee, R. G., and Reuss, J. O.: Phoenix, a model of  
692 the dynamics of carbon and nitrogen in grassland soils, in: *Terrestrial Nitrogen Cycles*,  
693 edited by: Clark, F. E., and Rosswall, T., *Ecological Bulletins* 33, 49-115, 1981.

694 Medrano, H., Escalona, J. M., Bota, J., Gulías, J., and Flexas, J.: Regulation of  
695 photosynthesis of C<sub>3</sub> plants in response to progressive drought: stomatal conductance  
696 as a reference parameter, *Ann. Bot.*, 89, 895-905, doi: 10.1093/aob/mcf079, 2002.

697 Millington, R. J., and Quirk, J. M.: Transport in porous media, in: 7<sup>th</sup> *Trans. Int. Congr.*  
698 *Soil Sci.* vol. 1, edited by: van Beren, F. A., Madison, WI, Elsevier, Amsterdam, 97-  
699 106, 1960.

700 Mosey, F. E.: Kinetic descriptions of anaerobic digestion, in: *Third International*  
701 *Symposium on Anaerobic Digestion*, Univ. Cambridge, Boston, MS, 37-52, 1983.

702 Perrier, A.: Land surface processes: vegetation, in: *Atmospheric General Circulation*  
703 *Models*, edited by: Eagleson, P. S., Cambridge Univ. Press., Cambridge, UK, 395-448,  
704 1982.

705 Pirt, S. J.: Principles of Microbe and Cell Cultivation, Blackwell Scientific, Oxford,  
706 UK, 1975.

707 Postgate, J.: Nitrogen Fixation, 3<sup>rd</sup> edition, Cambridge Univ. Press, Cambridge, UK,  
708 1998.

709 Robinson, J. A., and Tiedje, J. M.: Kinetics of hydrogen consumption by rumen fluid,  
710 digester sludge and sediment, Appl. Environ. Microbiol., 44, 1374-1384, 1982.

711 Sawada, S., Sakamoto, T., Sato, M., Kasai, M., and Usuda, H.: Photosynthesis with  
712 single-rooted Amaranthus leaves. II. Regulation of Ribulose-1,5-Bisphosphate  
713 Carboxylase, Phosphoenolpyruvate Carboxylase, NAD-Malic Enzyme and NAD-  
714 Malate Dehydrogenase and coordination between PCR and C<sub>4</sub> photosynthetic  
715 metabolism in response to changes in the source-sink balance, Plant Cell Physiol.,  
716 43, 1293-301, doi: 10.1093/pcp/pcf153, 2002.

717 Schink, B.: Energetics of syntrophic cooperation in methanogenic degradation,  
718 Microbiol. Mol. Biol. Rev., 61, 262-280, 1997.

719 Seeman, J. R., Badger, M. R., and Berry, J. A.: Variations in the specific activity of  
720 ribulose-1,5-bisphosphate carboxylase between species utilizing differing  
721 photosynthetic pathways, Plant Physiol., 74, 791-794, doi: 10.1104/pp.74.4.791,  
722 1984.

723 Sharpe, P. S. H., and DeMichelle, D. W.: Reaction kinetics of poikilothermic  
724 development, J. Theor. Biol., 64, 649-670, doi: 10.1016/0022-5193(77)90265-X,  
725 1977.



726 Shea, T. G., Pretorius, W. E., Cole, R. D., and Pearson, E. A.: Kinetics of hydrogen  
727 assimilation in the methane fermentation, *Water Res.*, 2, 833-848, doi:  
728 10.1016/0043-1354(68)90038-9, 1968.

729 Shields, J. A., Paul, E. A., Lowe, W. E., and Parkinson, D.: Turnover of microbial tissue  
730 in soil under field conditions, *Soil Biol. Biochem.*, 5, 753-764, doi: 10.1016/0038-  
731 0717(73)90020-5, 1973.

732 Shulten, H.-R., and Schnitzer, M.: Chemical model structures for organic matter and  
733 soils, *Soil Sci.*, 162, 115-130, 1997.

734 Skopp, J.: Oxygen uptake and transfer in soils: analysis of the air-water interfacial area,  
735 *Soil Sci. Soc. Amer. J.*, 49, 1327-1331, doi: 10.2136/sssaj1985.036159950049000  
736 60001x, 1985.

737 Smith, M. R., and Mah, R. A.: Growth and methanogenesis by *Methanosarcina* strain 227  
738 on acetate and methanol, *Appl. Environ. Microbiol.*, 36, 870-879, 1978.

739 Suzuki, I., Dular, U., and Kwok, S. C.: Ammonia or ammonium ion as substrate for  
740 oxidation by *Nitrosomonas europaeae* cells and extracts, *J. Bacteriol.*, 120, 556-558,  
741 1974.

742 van Bavel, C. H. M., and Hillel, D. I.: Calculating potential and actual evaporation from a  
743 bare soil surface by simulation of concurrent flow of water and heat, *Agric. Meteorol.*,  
744 17, 453-476, doi: 10.1016/0002-1571(76)90022-4, 1976.

745 Veen, B. W.: Relation between root respiration and root activity, *Plant Soil*, 63, 73-76.,  
746 doi: 10.1007/BF02374259, 1981.

747 Waring, R. H., and Running, S. W.: *Forest Ecosystems: Analysis at Multiple Scales*, 2<sup>nd</sup>  
748 edition, Academic Press, London, UK, 1998.

749 Wilhelm, E., Battino, R., and Wilcock, R. J.: Low-pressure solubility of gases in liquid  
750 water, Chem. Rev., 77, 219-262, doi: 10.1021/cr60306a003, 1977.

751 Williams, D. G., Gempko, V., Fravolini, A., Leavitt, S. W., Wall, G. W., Kimball, B. A.,  
752 Pinter Jr., P. J., LaMorte, R., and Ottman, M.: Carbon isotope discrimination by  
753 Sorghum bicolor under CO<sub>2</sub> enrichment and drought, New Phytol., 150, 285-293, doi:  
754 10.1046/j.1469-8137.2001.00093.x, 2001.

755 Wofford, N. G., Beaty, P. S., and McInerey, M. J.: Preparation of cell-free extracts and  
756 the enzymes involved in fatty acid metabolism in *Syntrophomonas wolfei*, J.  
757 Bacteriol., 167, 189-195, 1986.

758 Yoshinari, T., Hynes, R., and Knowles, R.: Acetylene inhibition of nitrous oxide  
759 reduction and measurement of denitrification and nitrogen fixation in soil, Soil Biol.  
760 Biochem., 9, 177-183, doi: 10.1016/0038-0717(77)90072-4, 1977.

761 Zehnder, A. J. B., and Wuhrmann, K.: Physiology of a *Methanobacterium* strain AZ,  
762 Arch. Microbiol., 111, 199-205, doi: 10.1007/BF00549357, 1977.

763 Zehnder, A. J. B., Huser, B. A., Brock, T. D. and Wuhrmann, K.: Characterization of an  
764 acetate-decarboxylating, non-hydrogen-oxidizing methane bacterium, Arch.  
765 Microbiol., 124, 1-11, doi: 10.1007/BF00407022, 1980.
